# Supplementary material for: Synthesis of phenoxathiins using an iron-catalysed C–H thioarylation
Source: Royal Society of Chemistry journal article supplement (doi:10.1039/d2ob00022a), 2022-01-01

**Supporting Information for:**

**Synthesis of phenoxathiins using an iron-catalysed C–H thioarylation**

Amy C. Dodds and Andrew Sutherland\*

*School of Chemistry, The Joseph Black Building, University of Glasgow, Glasgow G12 8QQ,  
UK. Email: Andrew.Sutherland@glasgow.ac.uk.*

**Table of Contents**

|                                                                                 |        |
|---------------------------------------------------------------------------------|--------|
| 1. $^1\text{H}$ and $^{13}\text{C}\{^1\text{H}\}$ NMR Spectra for all Compounds | S2–S61 |
|---------------------------------------------------------------------------------|--------|

<sup>1</sup>H NMR (400 MHz, CDCl<sub>3</sub>)

7.54  
7.54  
7.52  
7.52  
7.34  
7.33  
7.25  
7.24  
7.22  
7.22  
7.14  
7.13  
7.12  
7.12  
7.11  
7.10  
7.09  
7.02  
7.02  
7.00  
7.00  
7.00  
6.98  
6.98  
6.61  
6.61  
6.59  
6.59  
6.21

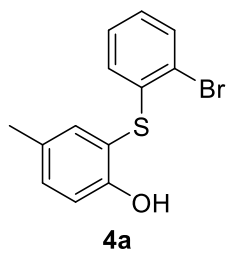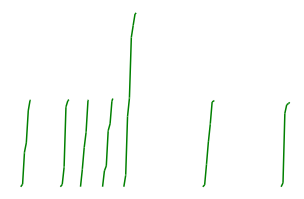

2.31

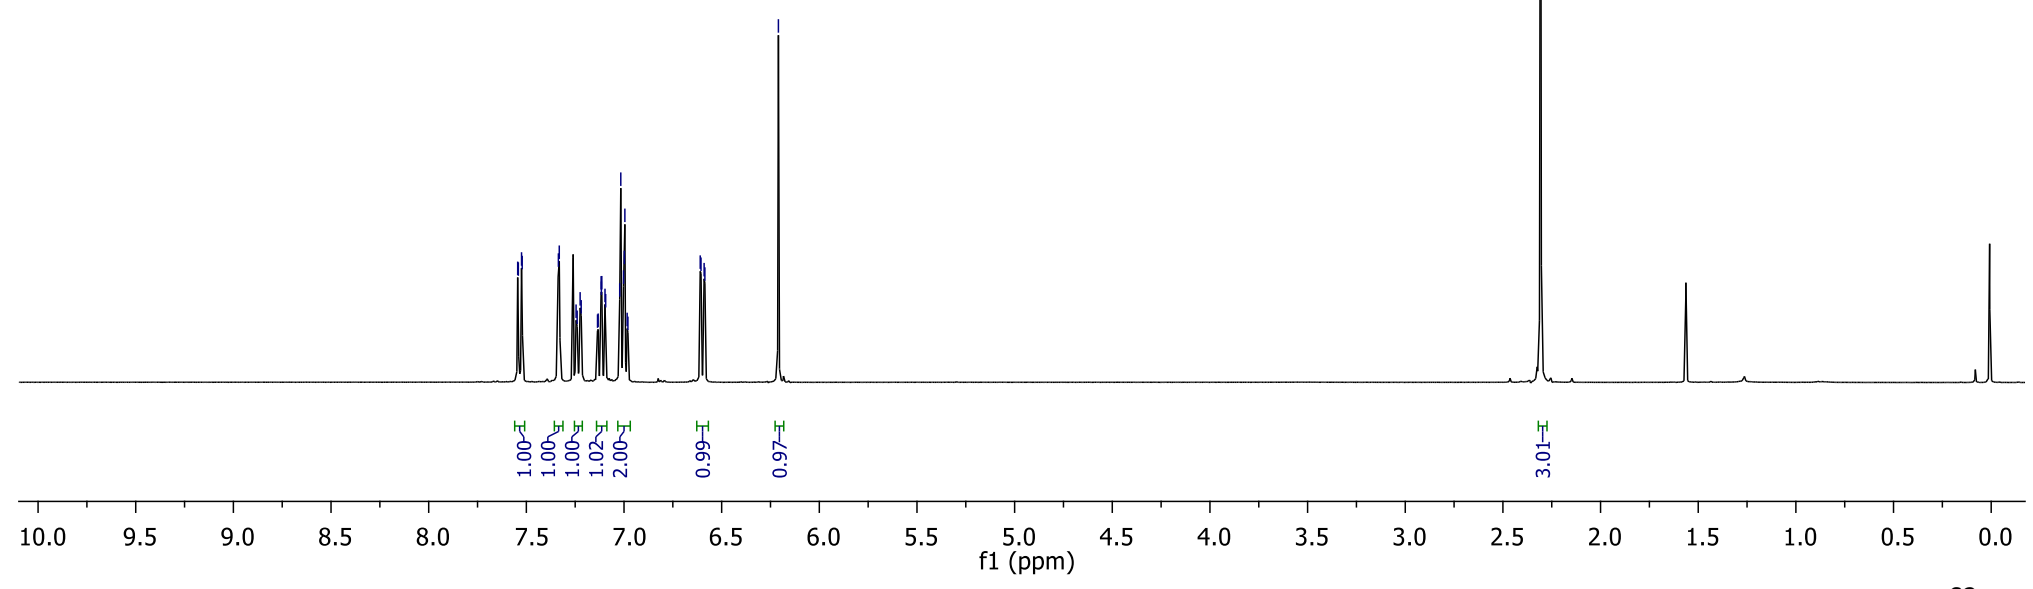

$^{13}\text{C}$  NMR (101 MHz,  $\text{CDCl}_3$ )

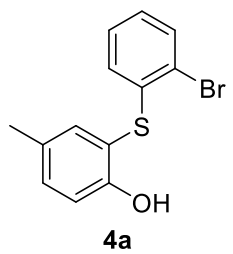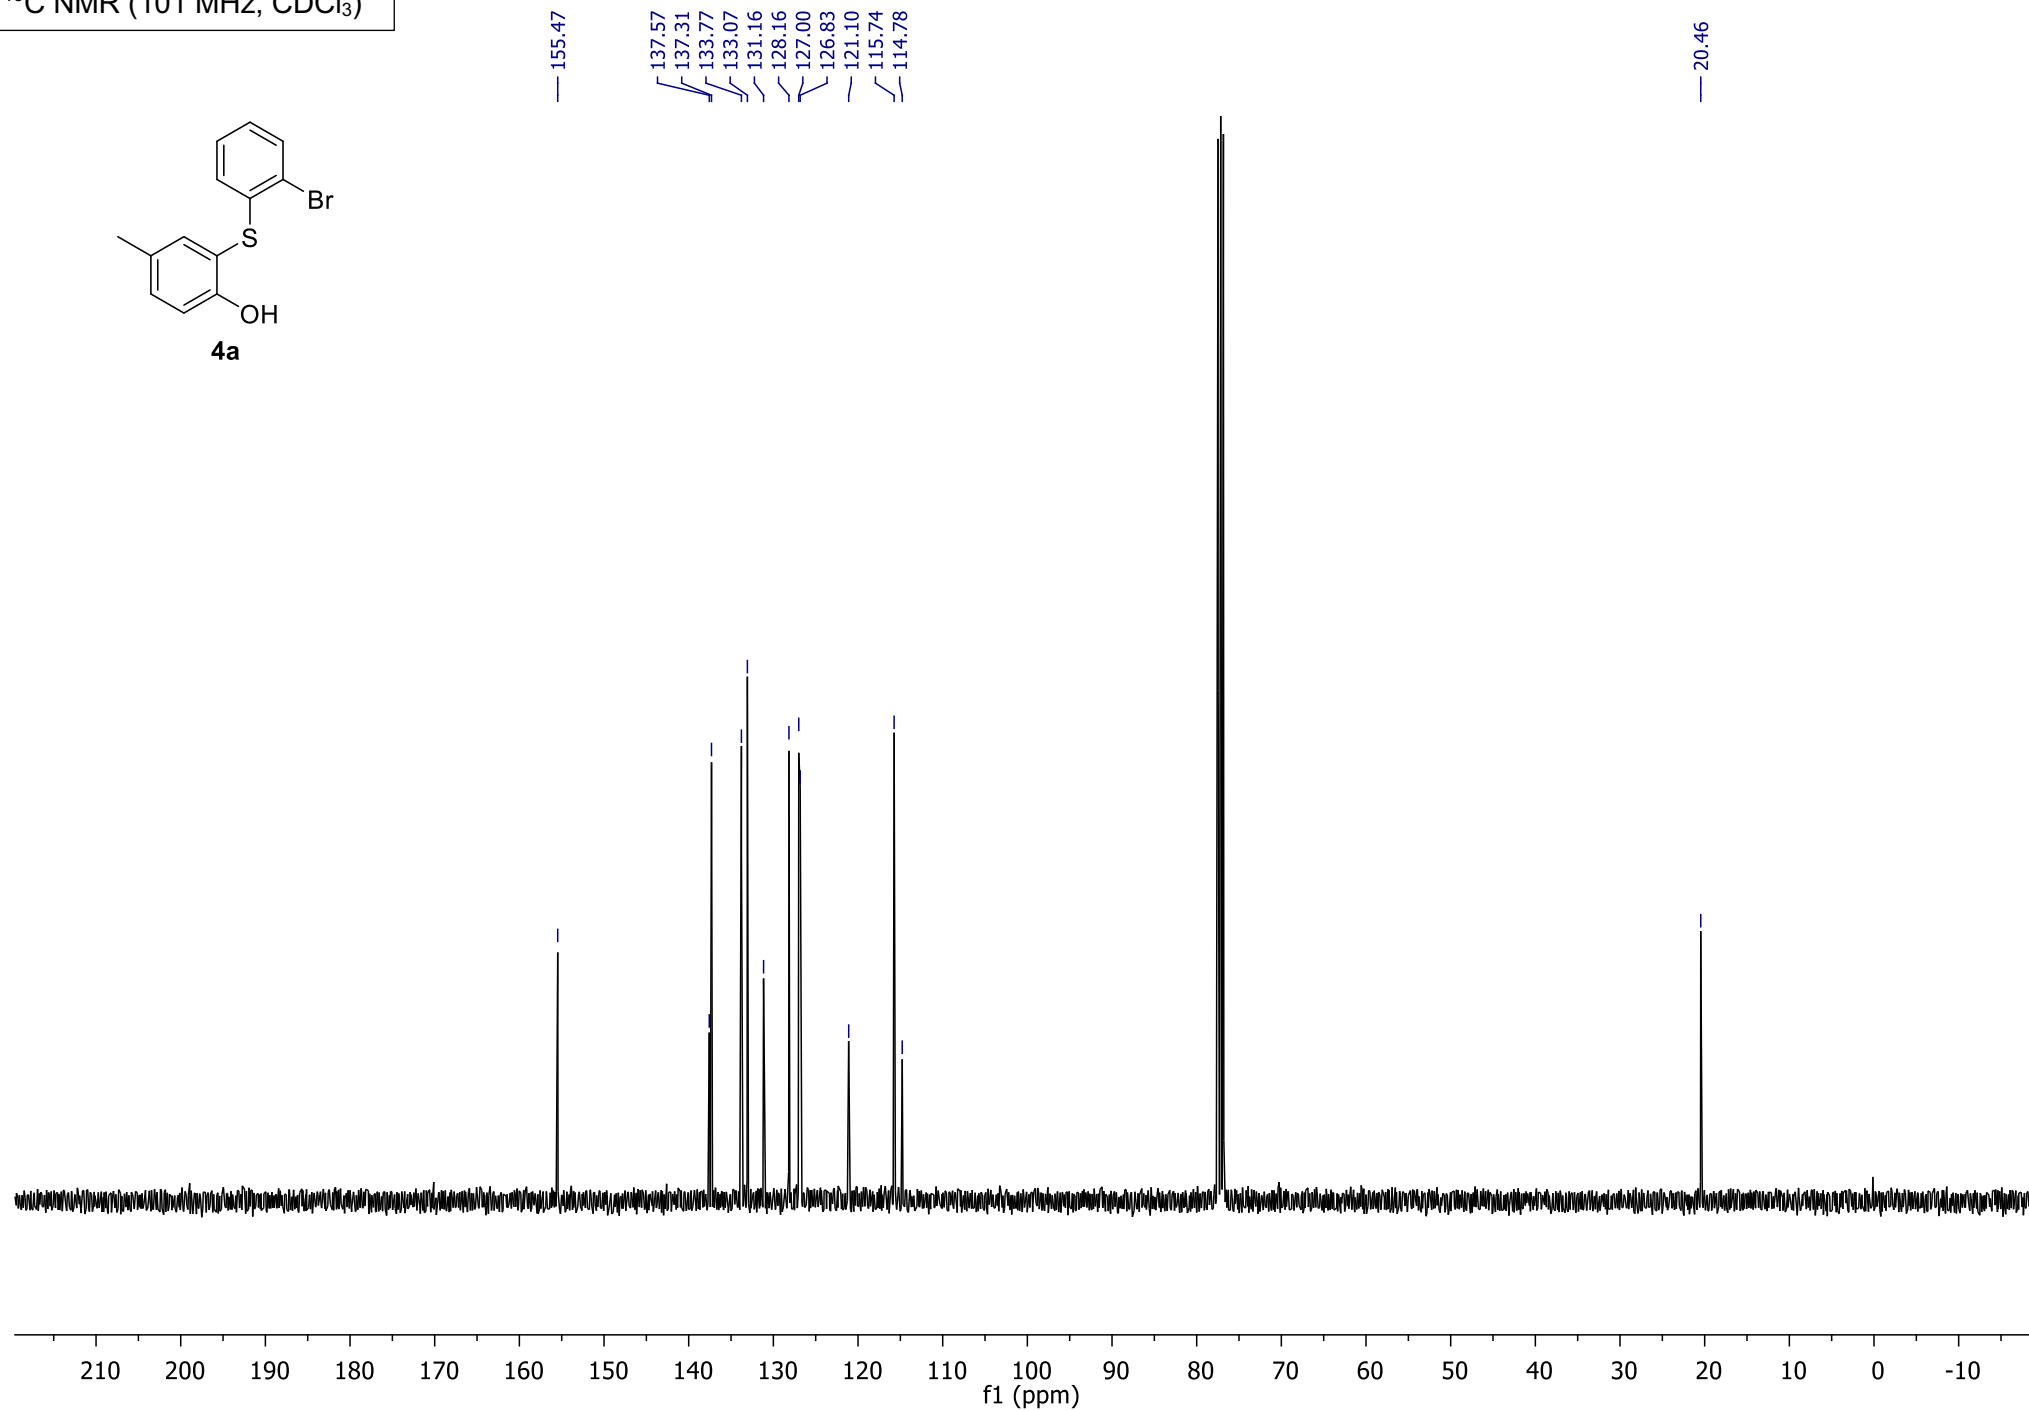

<sup>1</sup>H NMR (400 MHz, CDCl<sub>3</sub>)

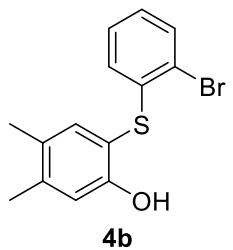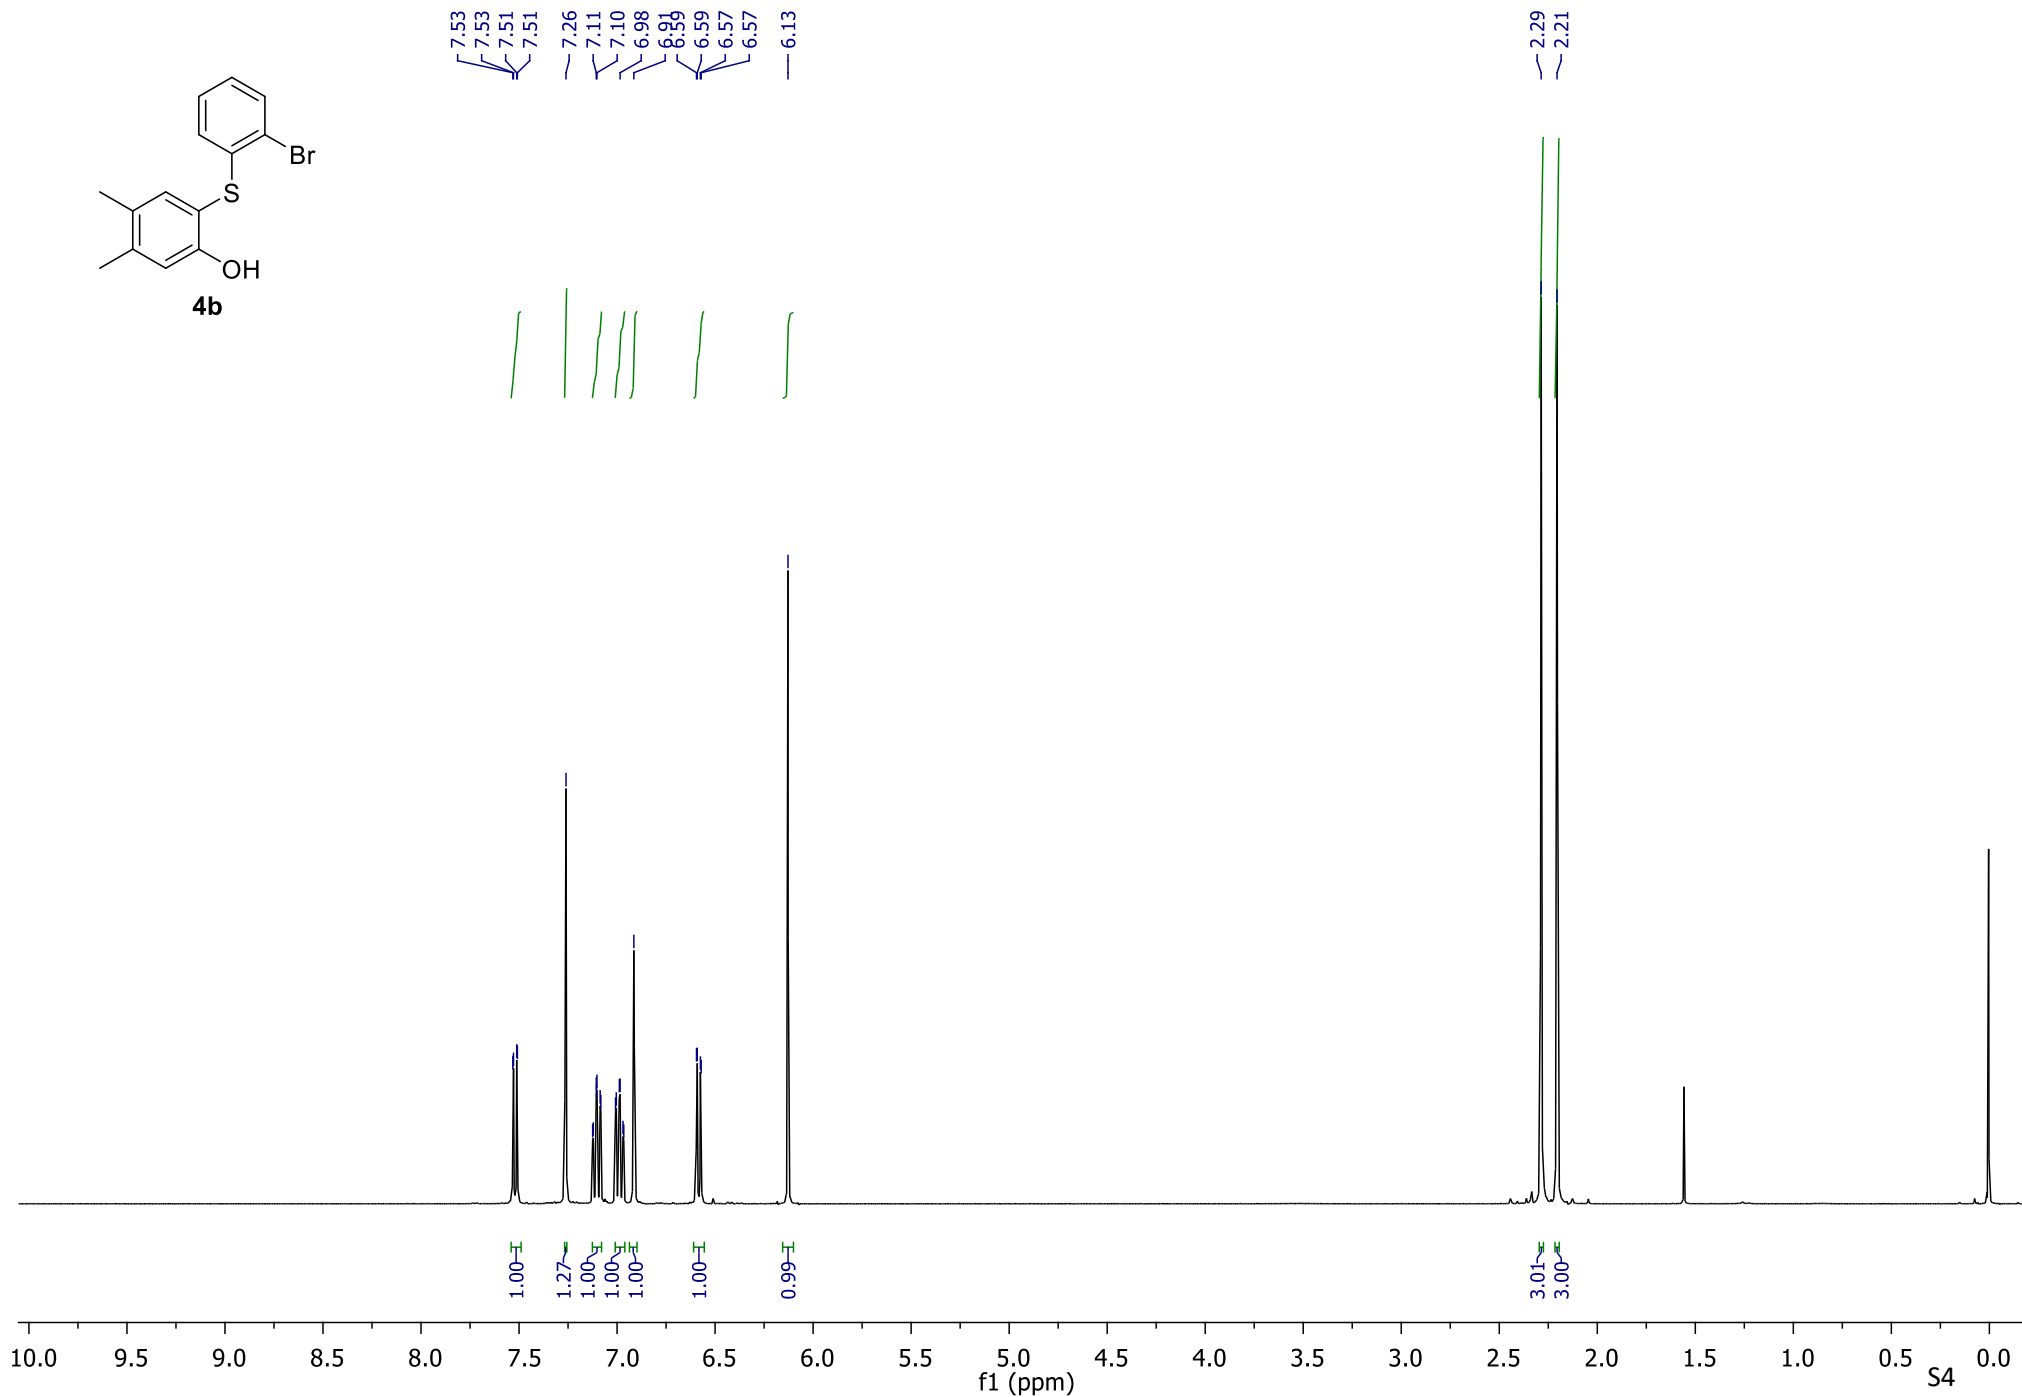

<sup>13</sup>C NMR (101 MHz, CDCl<sub>3</sub>)

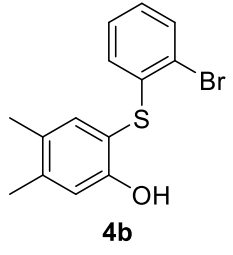

- 155.63
- 142.44
- 137.93
- 137.53
- 132.97
- 130.11
- 128.08
- 126.80
- 126.57
- 120.81
- 116.93
- 111.35
- 20.23
- 18.87

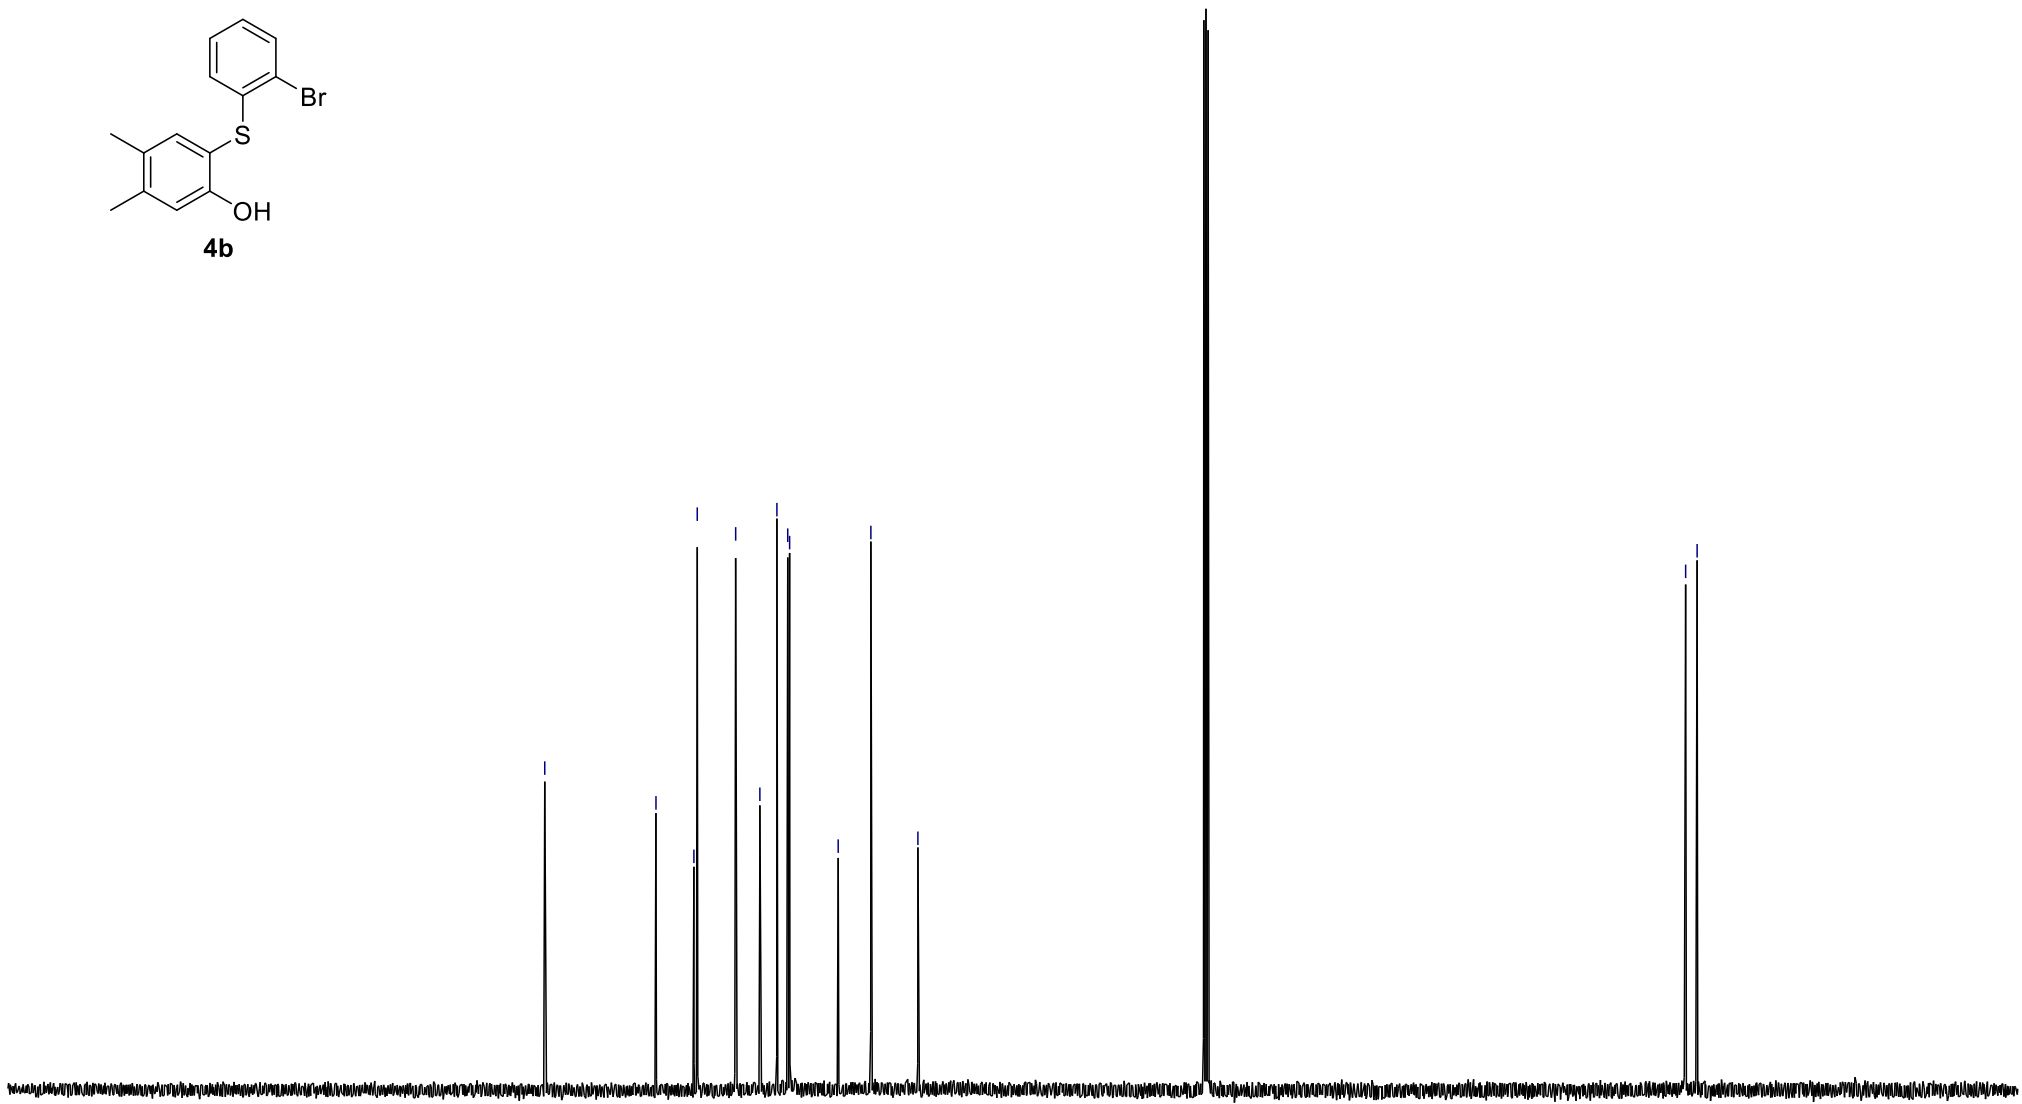

210 200 190 180 170 160 150 140 130 120 110 100 90 80 70 60 50 40 30 20 10 0 -10  
f1 (ppm)

<sup>1</sup>H NMR (400 MHz, CDCl<sub>3</sub>)

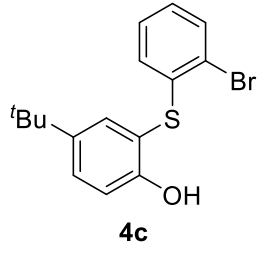

7.55  
7.55  
7.54  
7.53  
7.49  
7.48  
7.46  
7.46  
7.12  
7.12  
7.06  
7.04  
6.58  
6.57  
6.55

//  
///  
/  
/

1.32

2.00  
1.01  
1.00  
1.00  
1.02  
1.00  
1.00

9.00

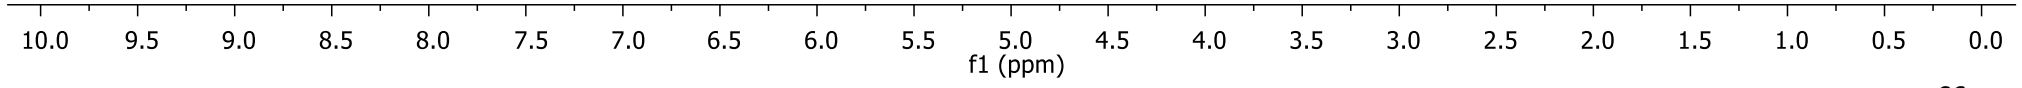

$^{13}\text{C}$  NMR (101 MHz,  $\text{CDCl}_3$ )

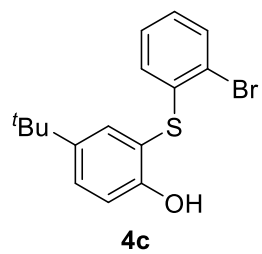

— 155.35  
— 144.83  
— 137.67  
— 133.95  
— 133.05  
— 130.24  
— 128.17  
— 126.89  
— 126.53  
— 120.91  
— 115.46  
— 114.32

— 34.39  
— 31.57

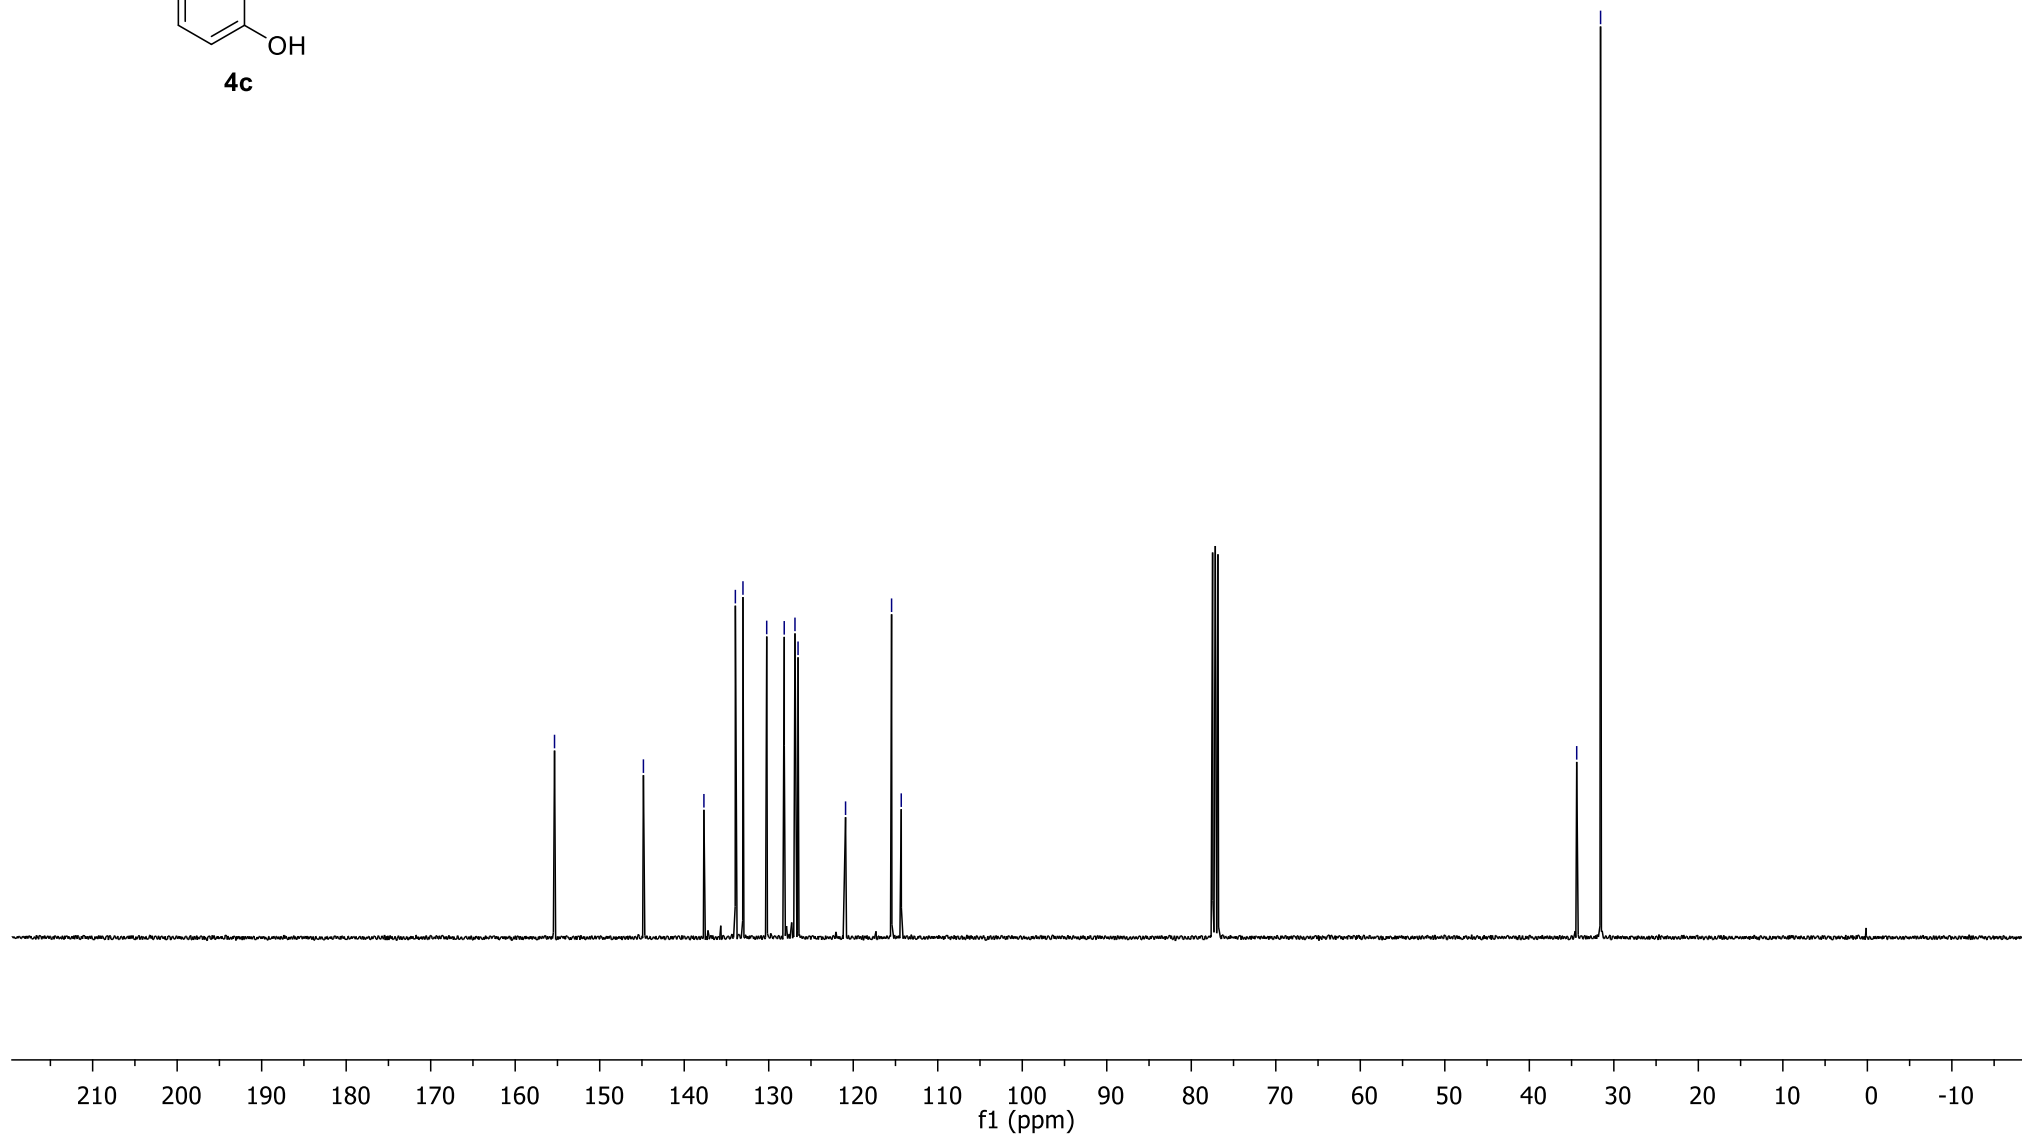

<sup>1</sup>H NMR (400 MHz, CDCl<sub>3</sub>)

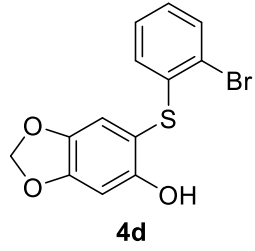

7.53  
7.53  
7.51  
7.51  
7.14  
7.14  
7.01  
6.92  
6.65  
6.64  
6.64  
6.64  
5.99

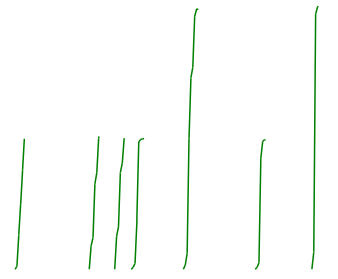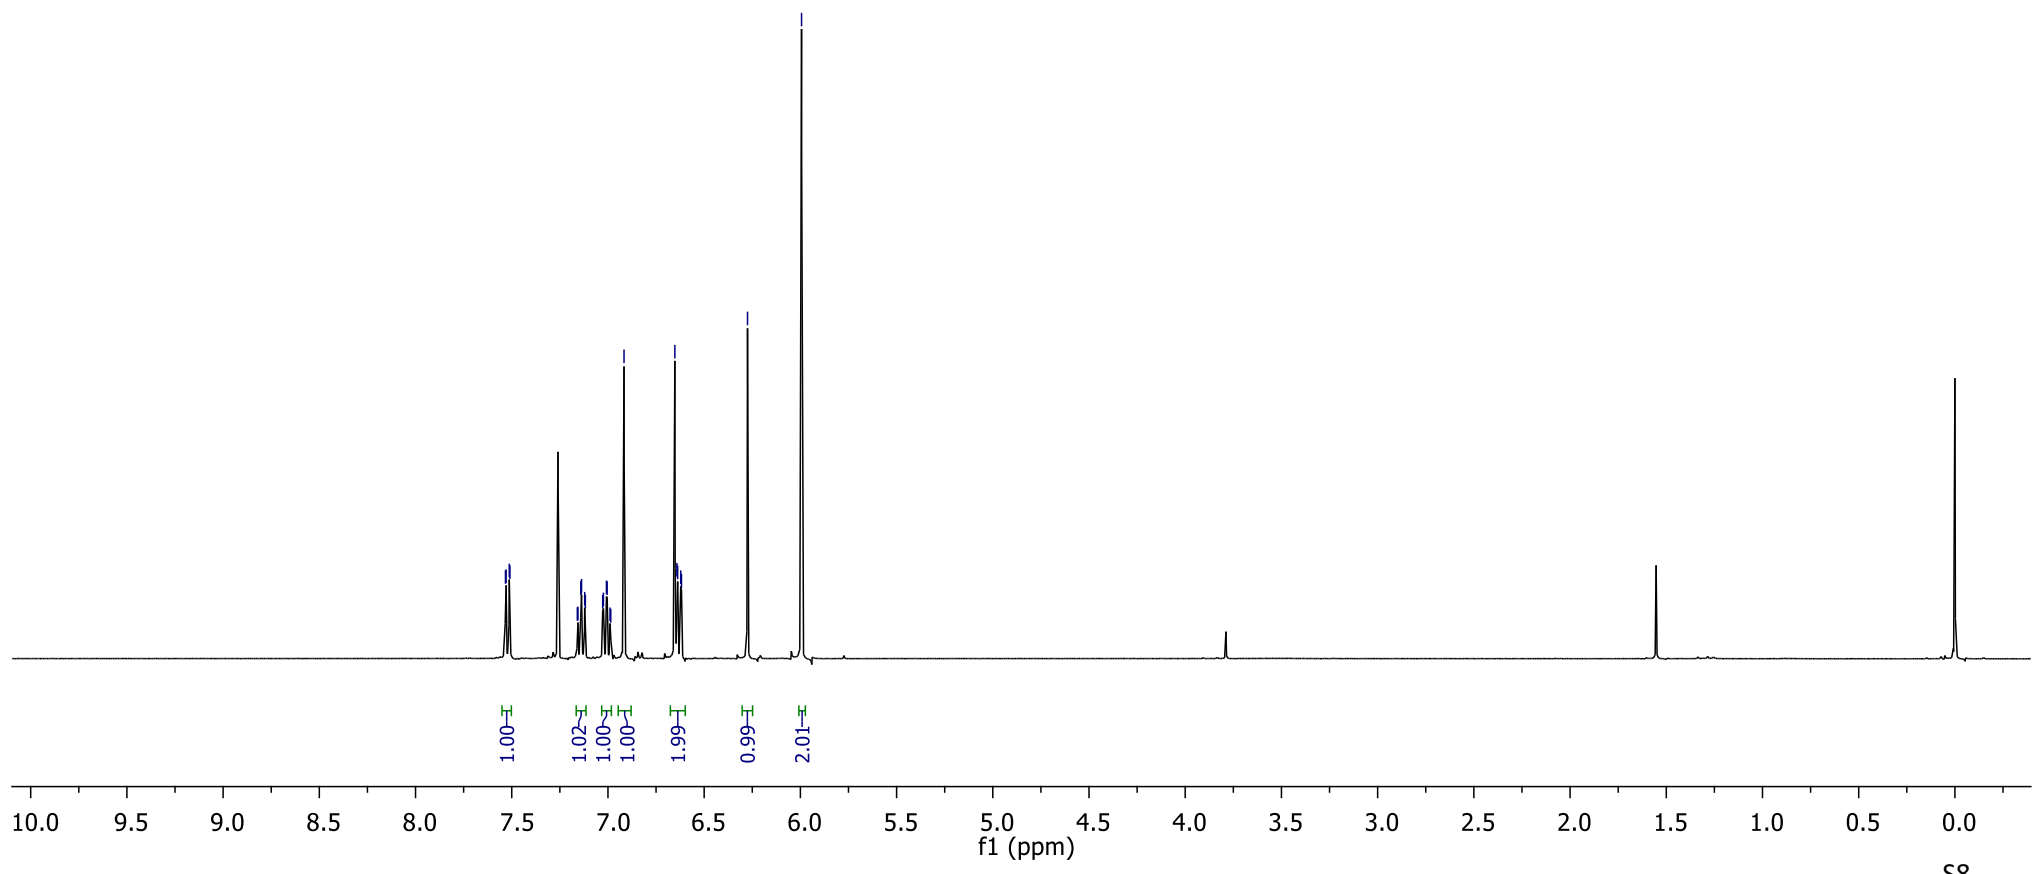



<sup>13</sup>C NMR (101 MHz, CDCl<sub>3</sub>)

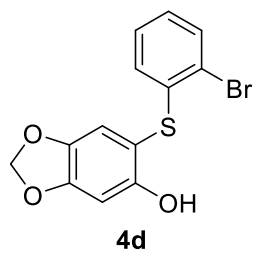

154.09  
151.64  
142.17  
137.85  
133.09  
128.16  
127.05  
126.51  
120.83  
114.65  
104.46  
101.91  
97.86

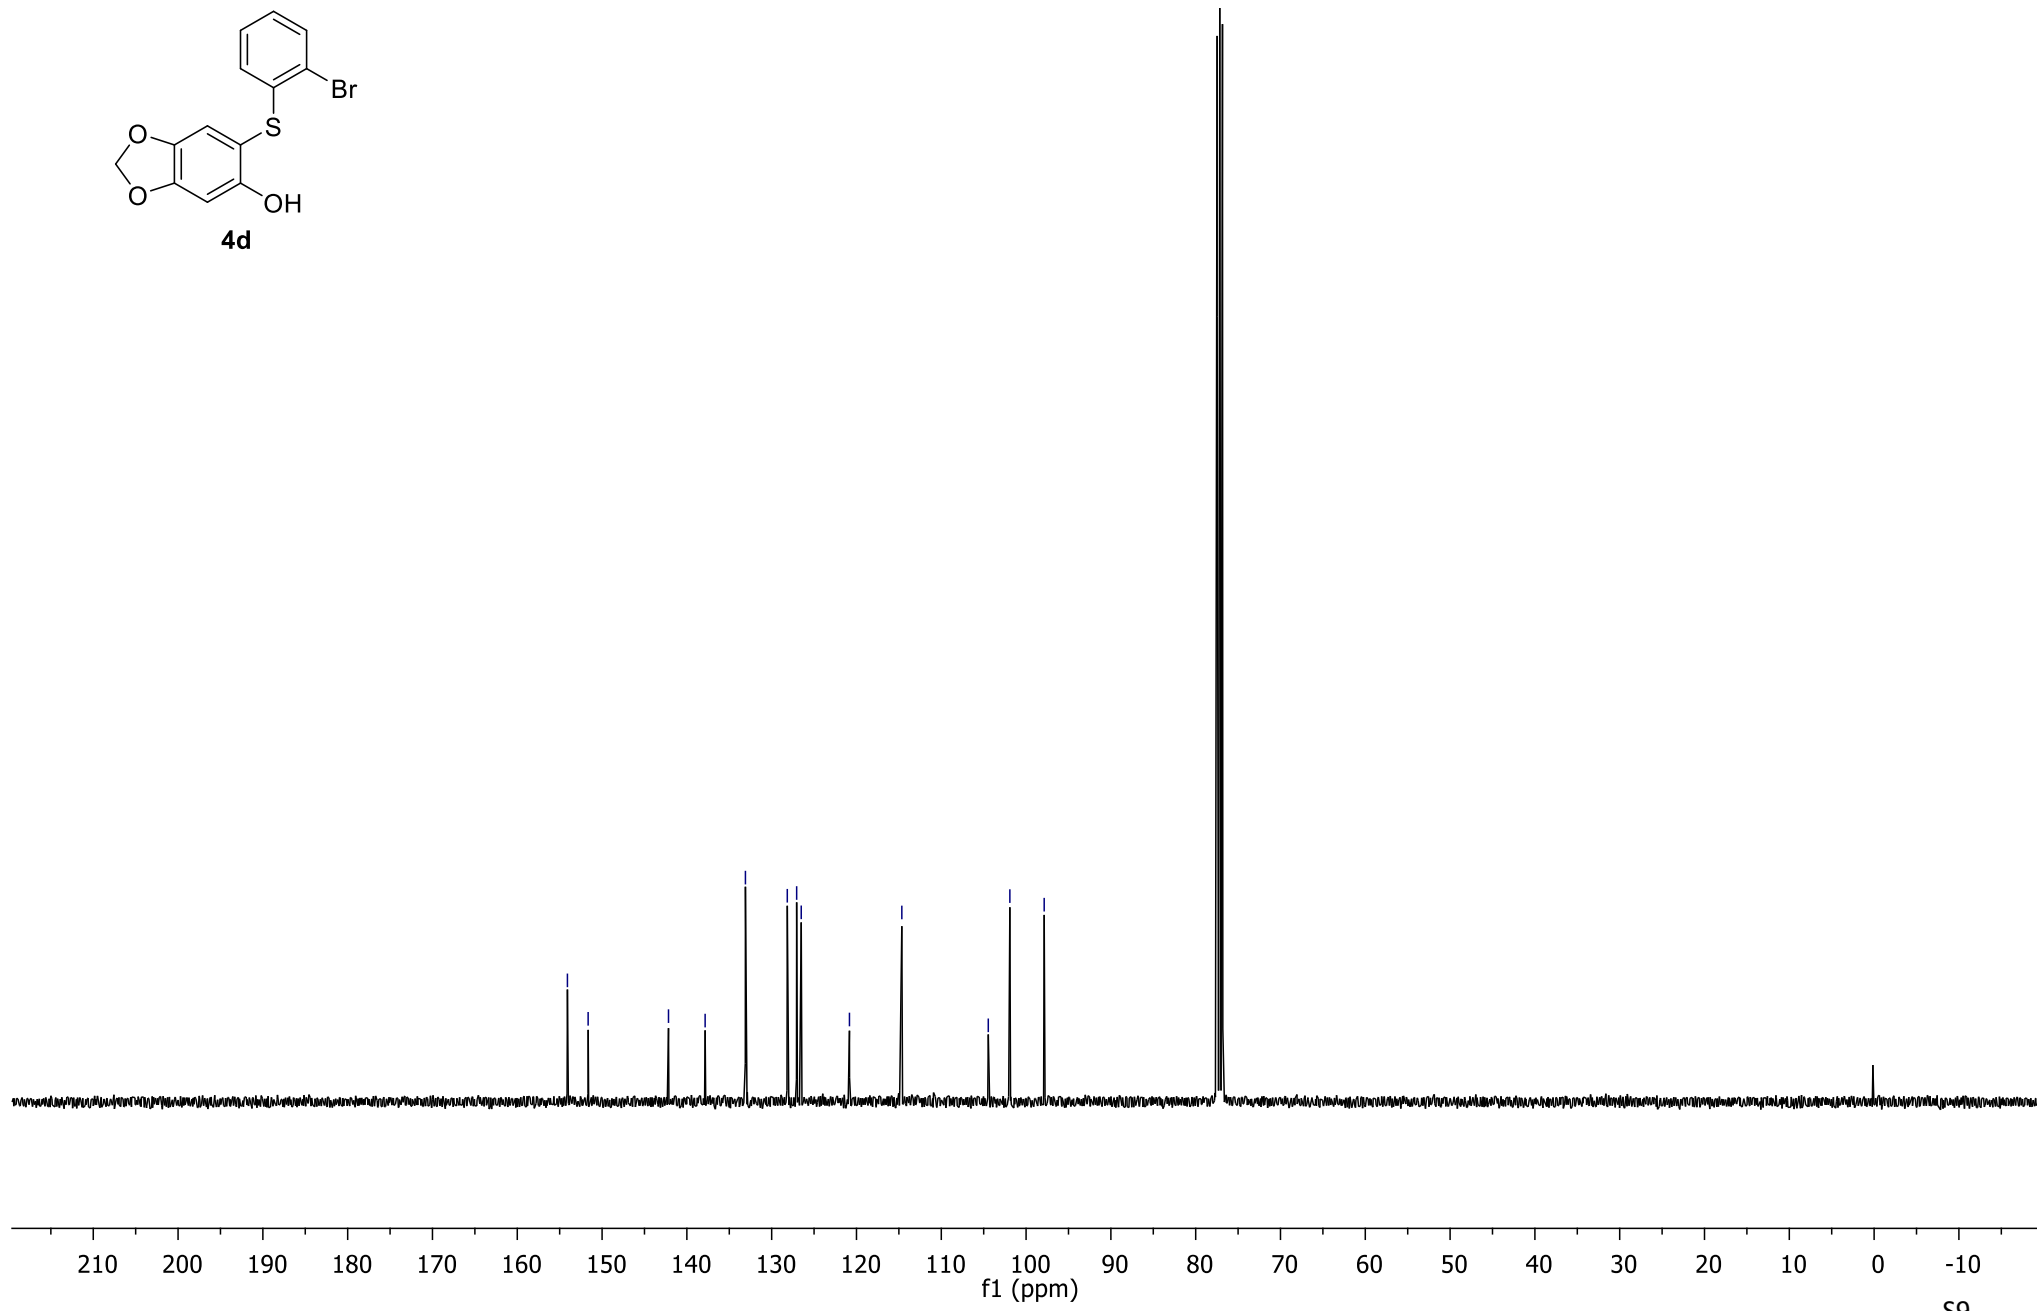

<sup>1</sup>H NMR (400 MHz, CDCl<sub>3</sub>)

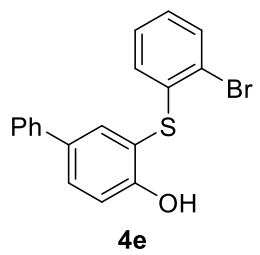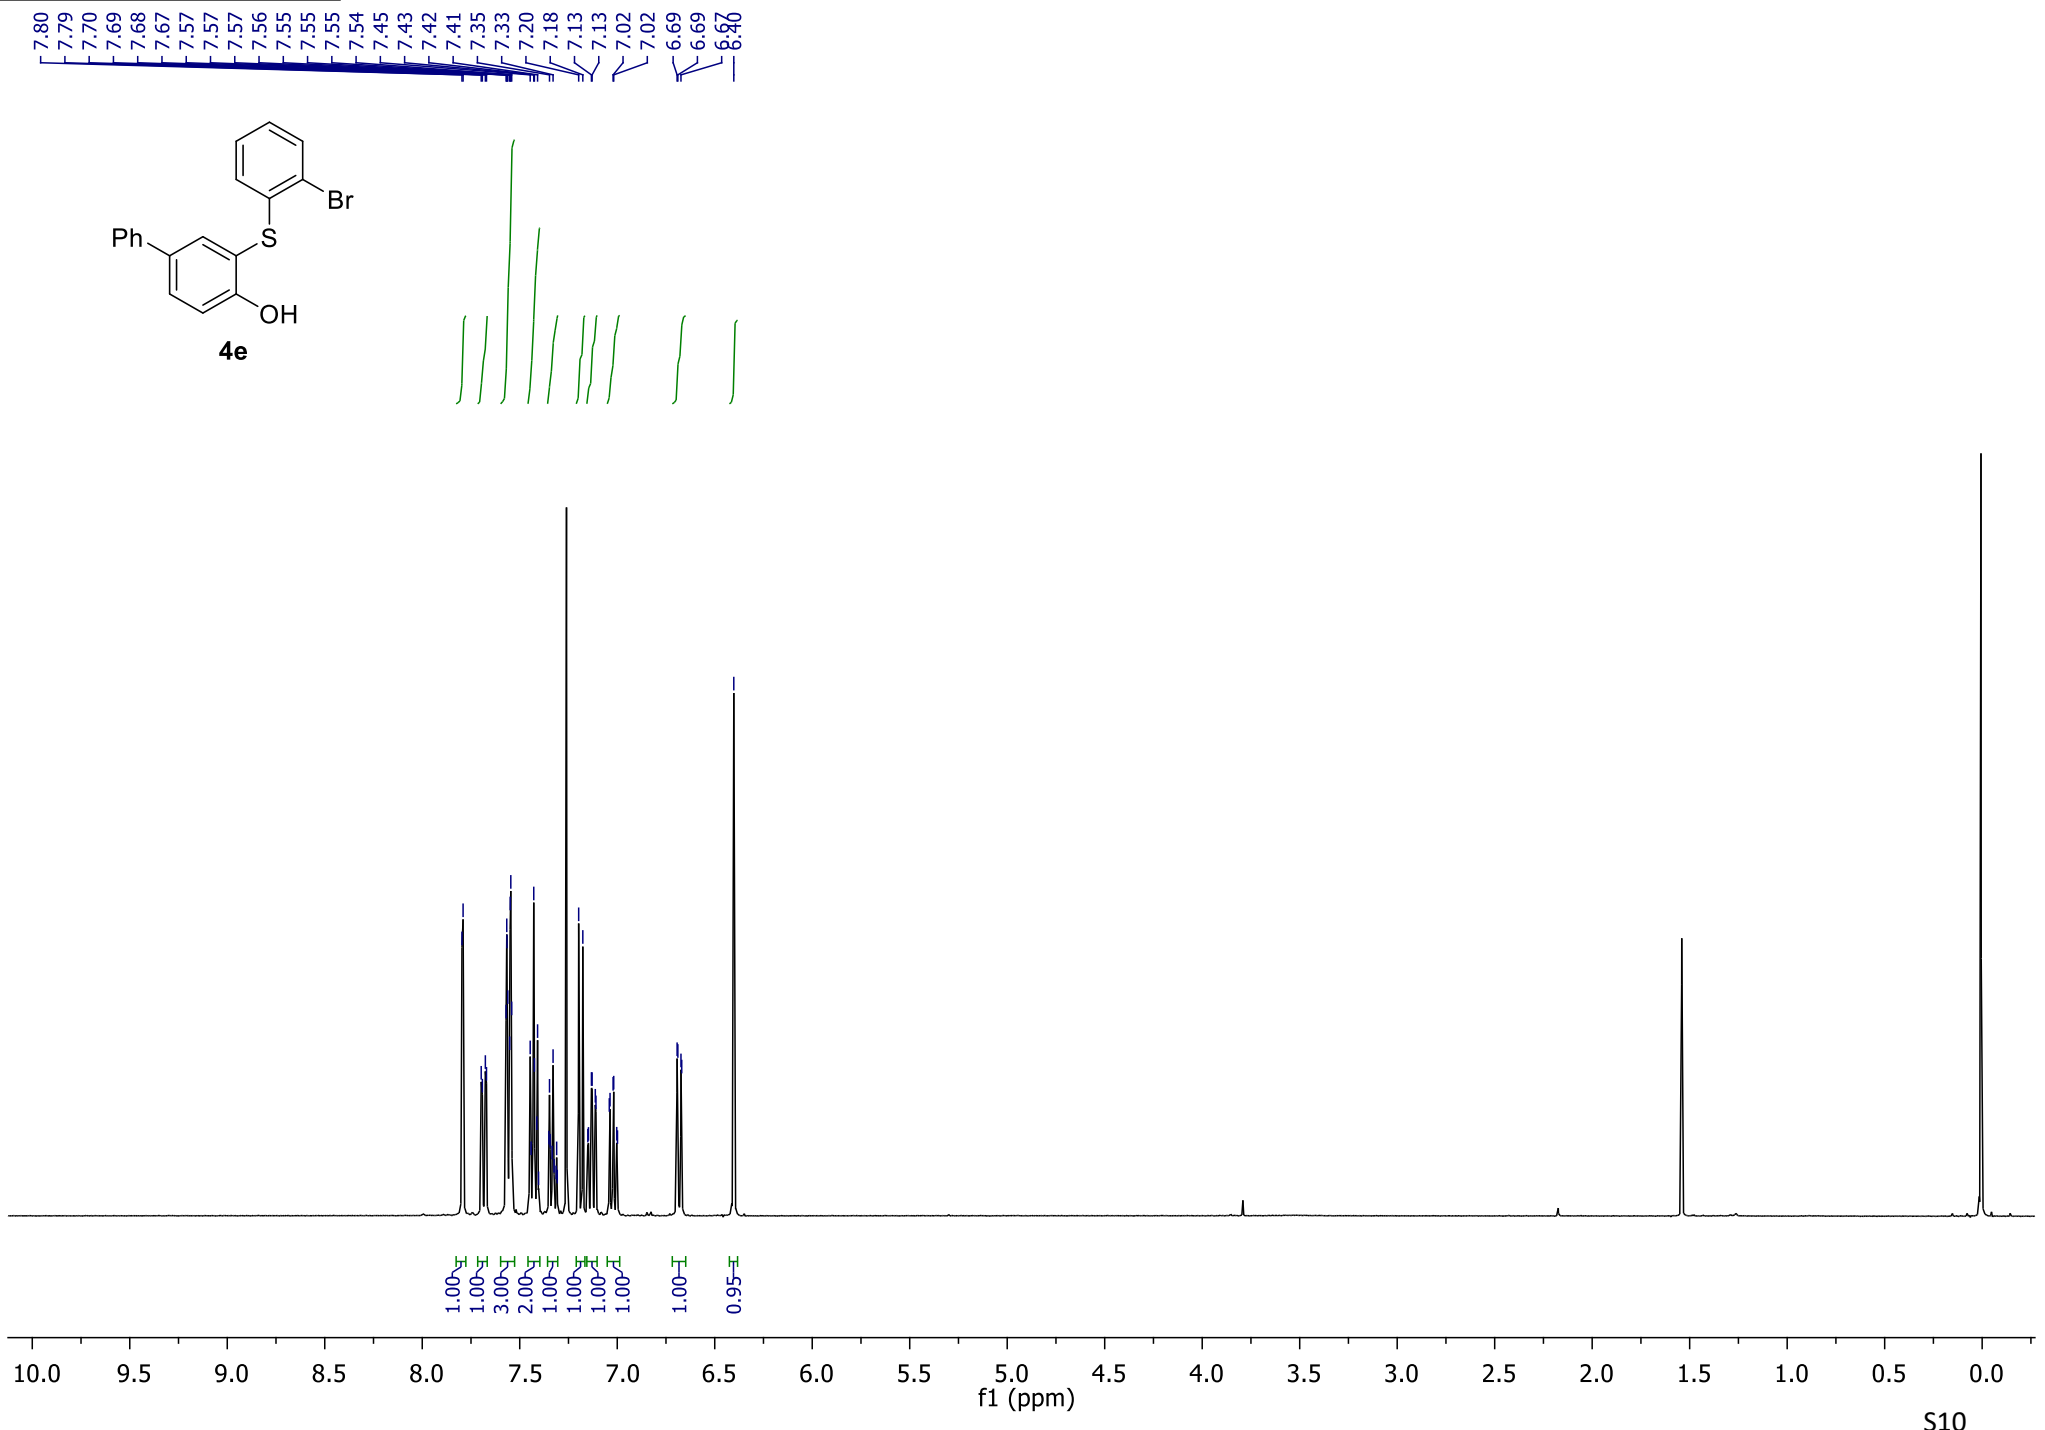

$^{13}\text{C}$  NMR (101 MHz,  $\text{CDCl}_3$ )

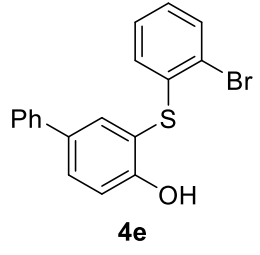

- 157.08
- 139.74
- 137.24
- 135.65
- 135.12
- 133.17
- 131.68
- 129.04
- 128.28
- 127.34
- 127.23
- 127.00
- 126.78
- 121.29
- 116.40
- 115.87

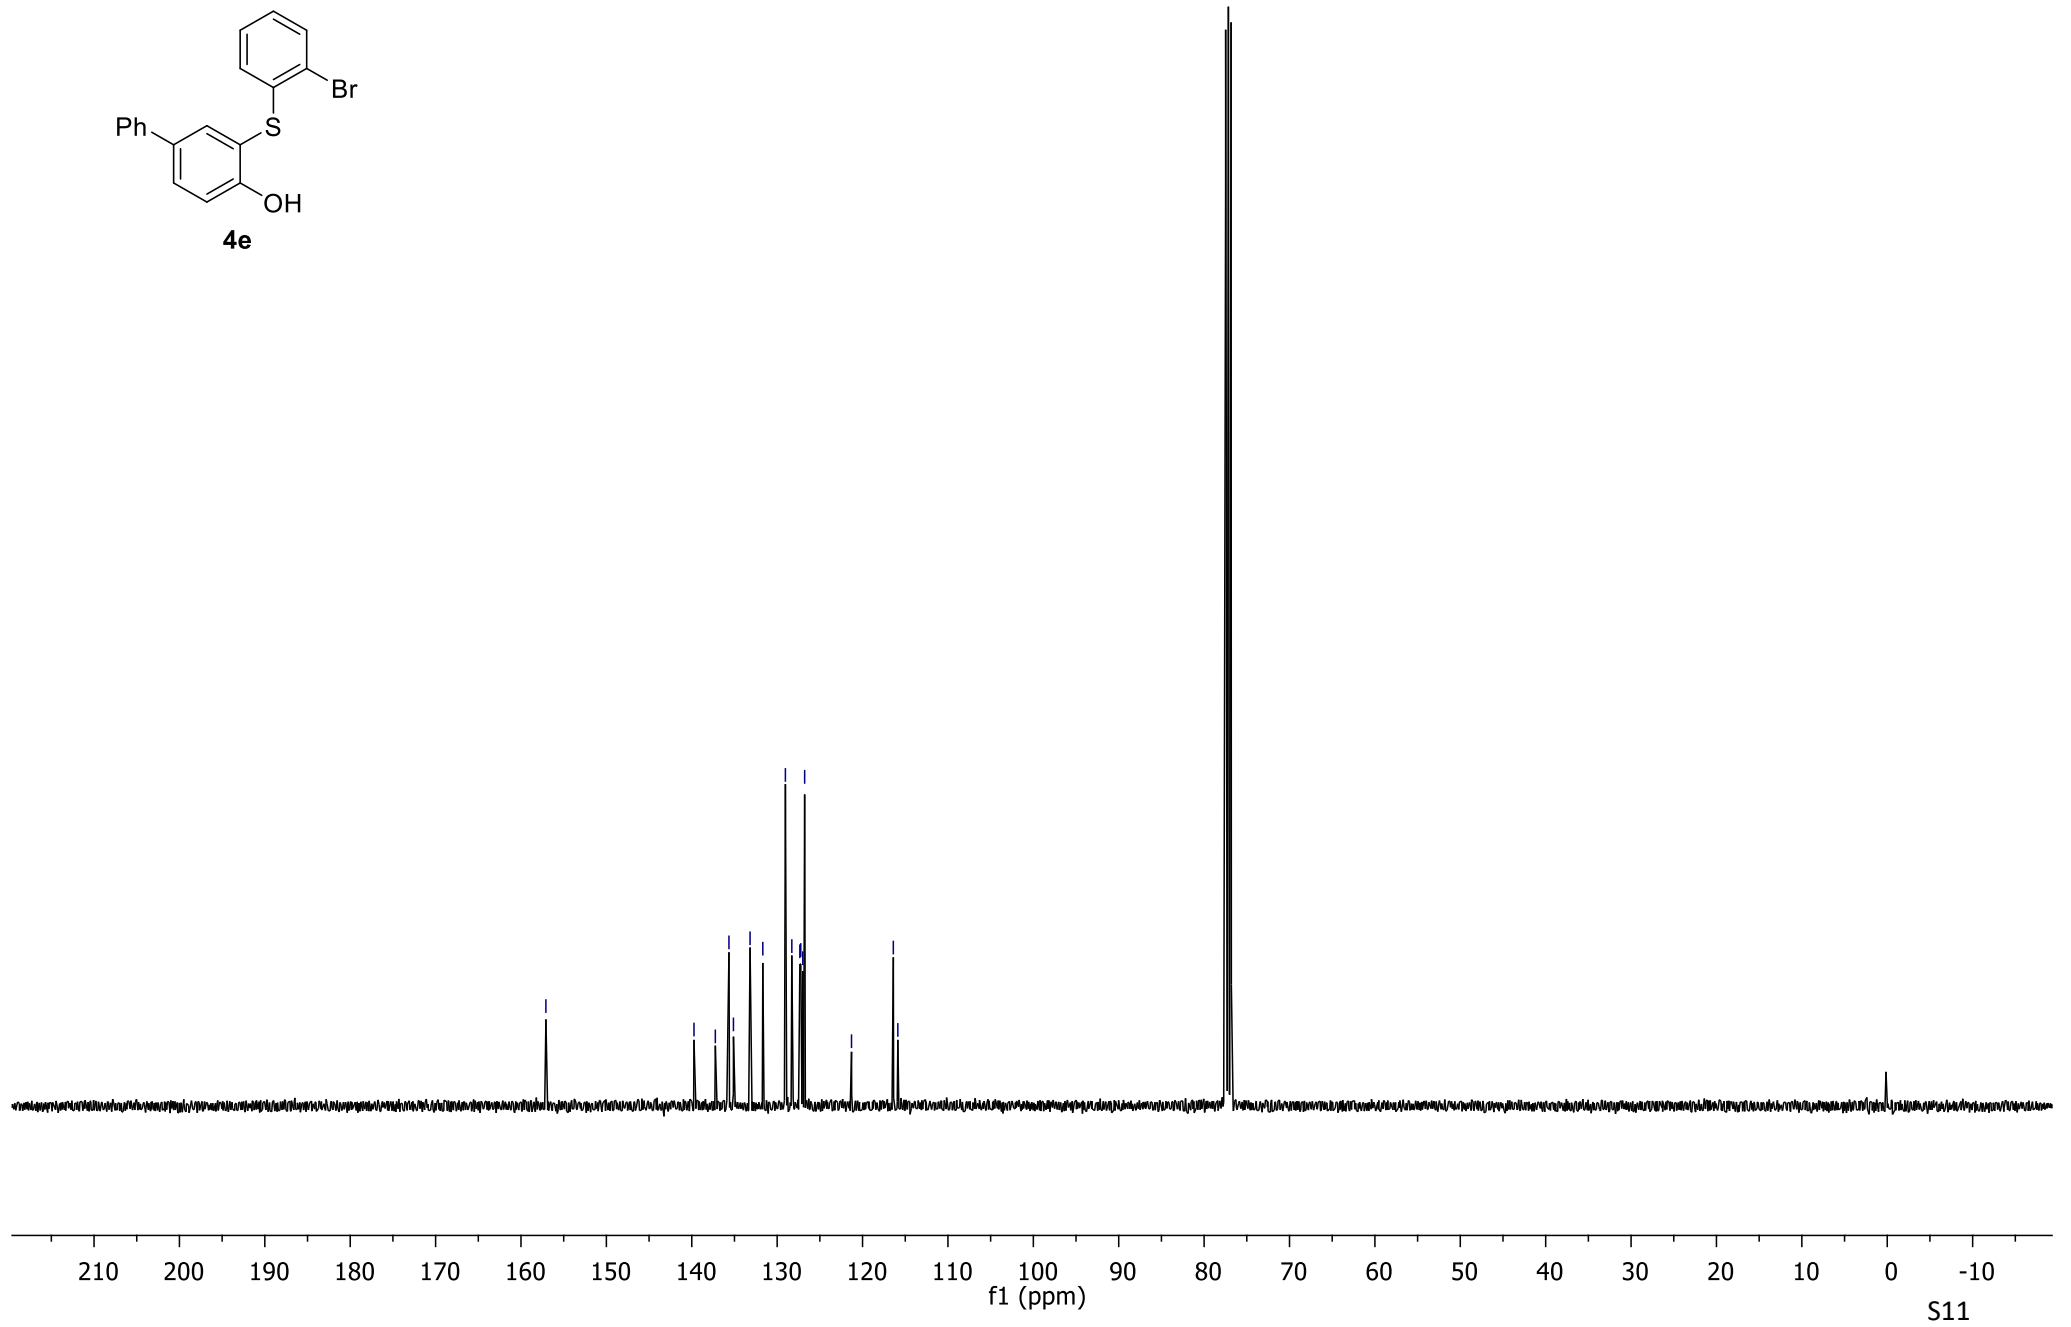

<sup>1</sup>H NMR (400 MHz, CDCl<sub>3</sub>)

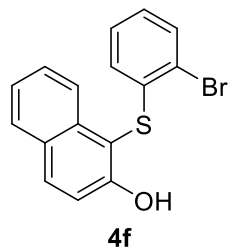

8.16  
8.13  
7.97  
7.94  
7.85  
7.83  
7.57  
7.57  
7.57  
7.56  
7.55  
7.54  
7.53  
7.53  
7.52  
7.51  
7.51  
7.49  
7.49  
7.42  
7.42  
7.40  
7.40  
7.40  
7.38  
7.38  
7.37  
7.35  
7.02  
6.96  
6.95  
6.37  
6.36  
6.36  
6.35  
6.35  
6.35  
6.34  
6.33

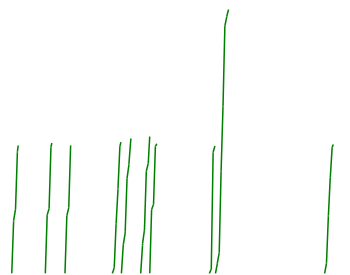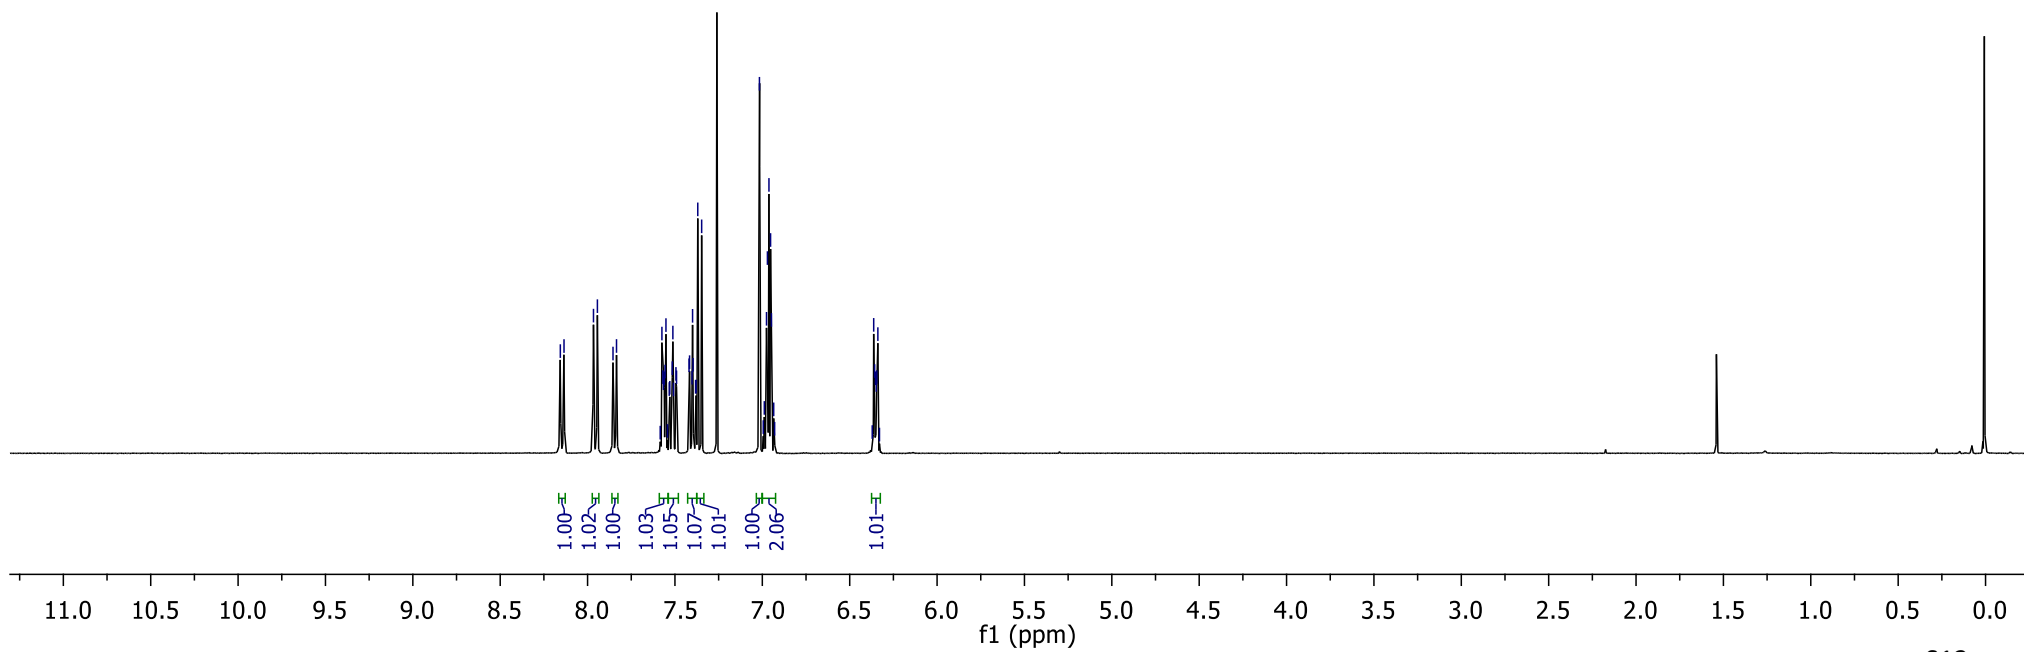

$^{13}\text{C}$  NMR (101 MHz,  $\text{CDCl}_3$ )

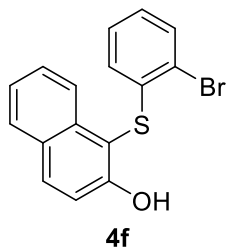

157.42  
136.59  
135.44  
133.46  
133.12  
129.71  
128.79  
128.35  
128.14  
126.96  
126.53  
124.67  
124.24  
121.22  
117.22  
107.32

77.48  
77.16  
76.84

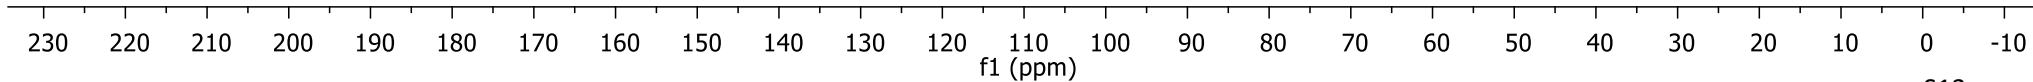

<sup>1</sup>H NMR (400 MHz, CDCl<sub>3</sub>)

9.87

8.08  
7.98  
7.97  
7.96  
7.95  
7.55  
7.55  
7.24  
7.21  
7.06  
7.05  
6.65  
6.64  
6.63  
6.62

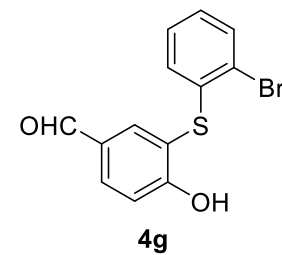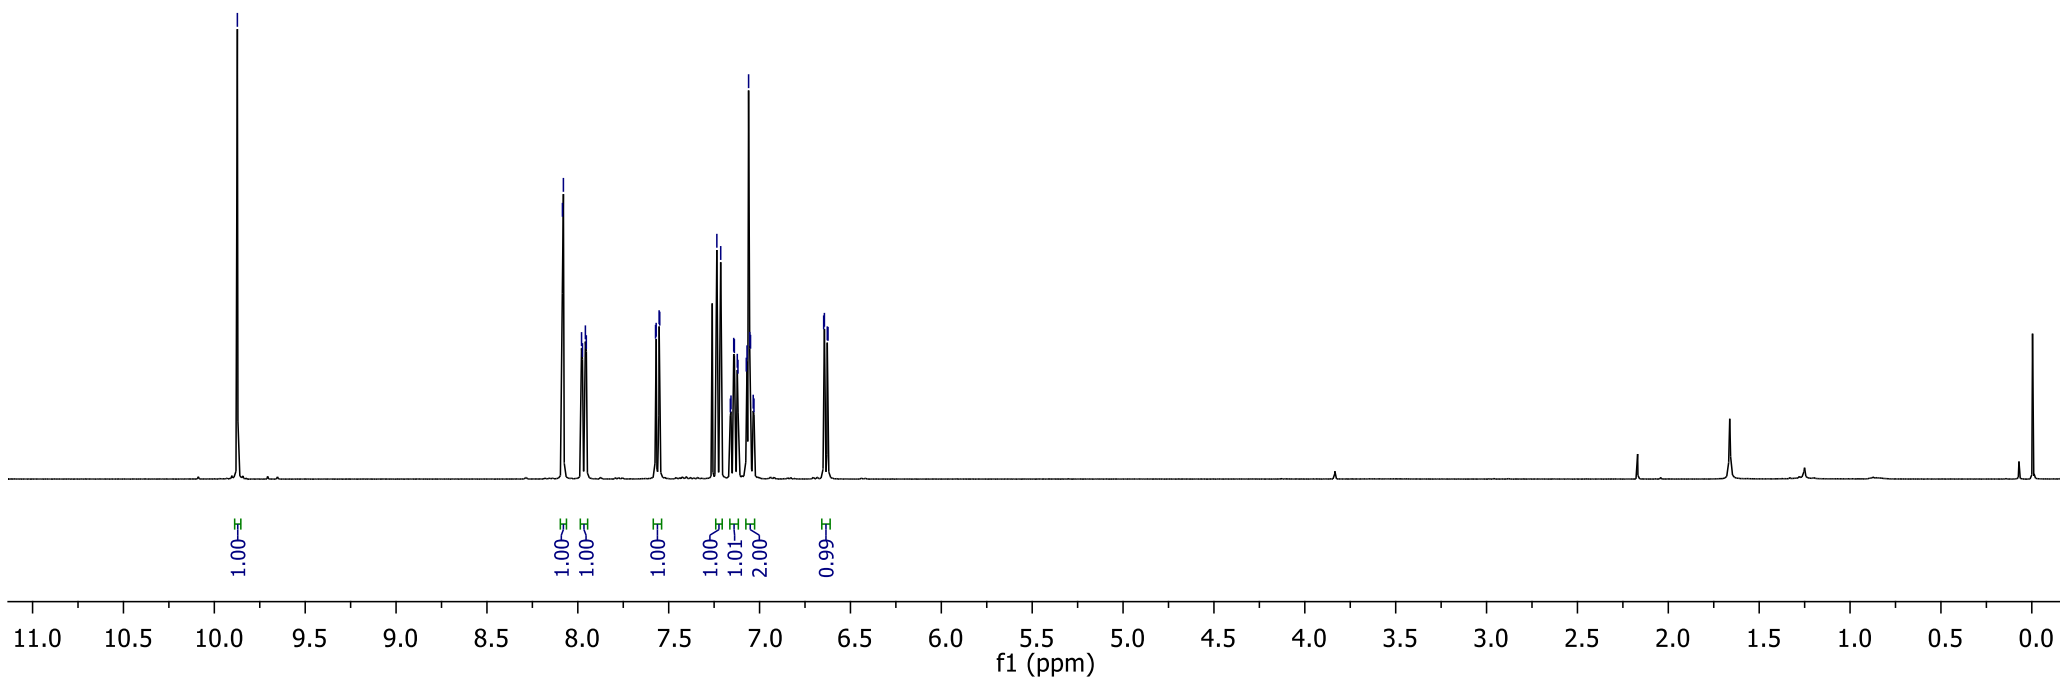

<sup>13</sup>C NMR (101 MHz, CDCl<sub>3</sub>)

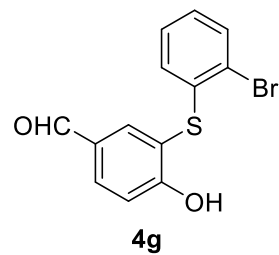

189.91

162.59

139.98  
136.04  
134.09  
133.40  
131.02  
128.39  
127.86  
127.45  
121.94  
117.25  
116.80

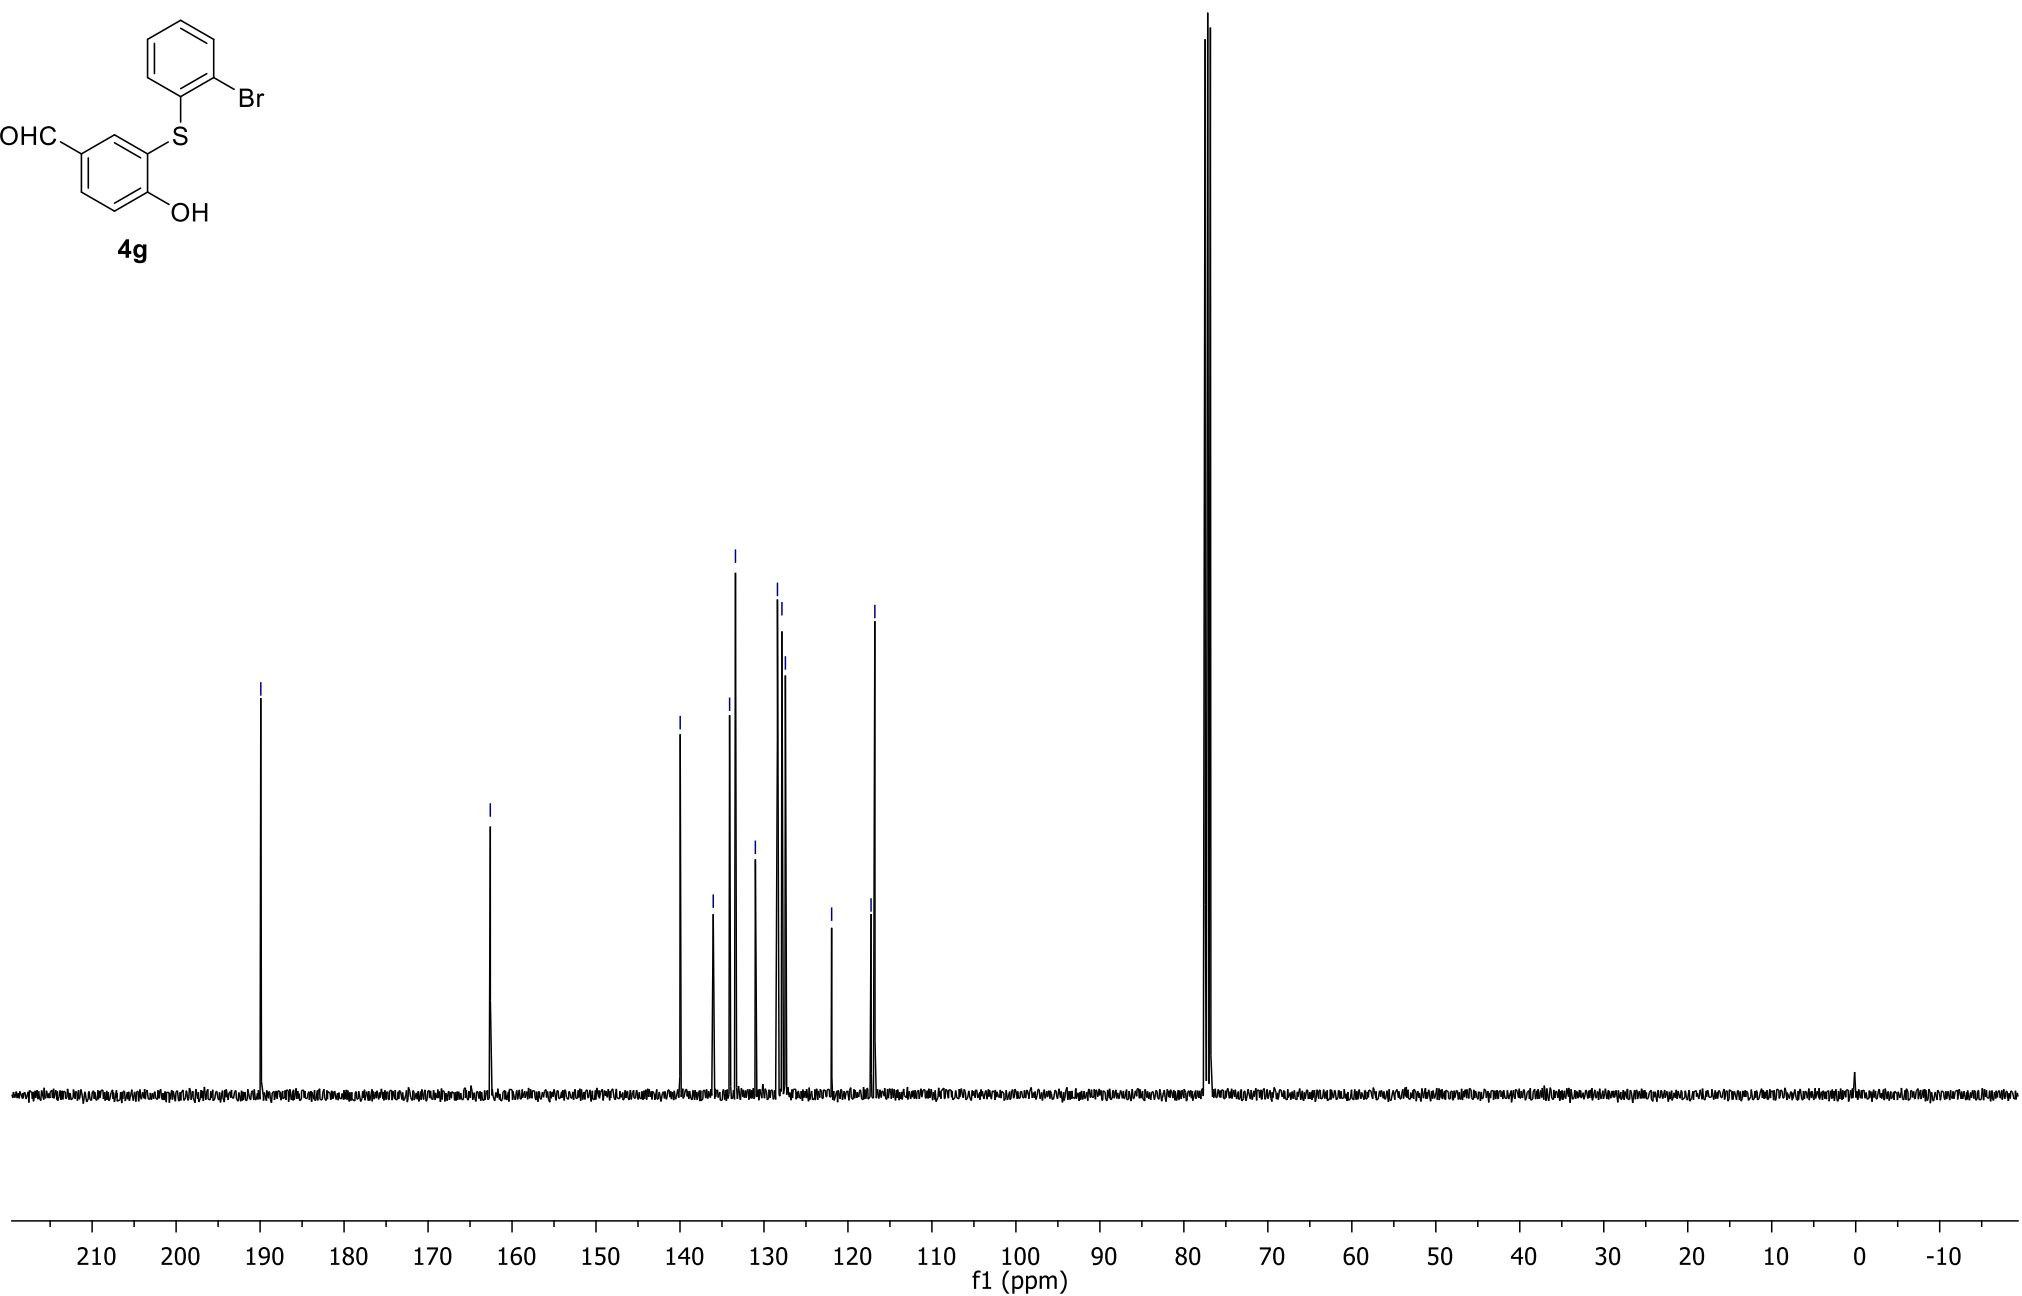

<sup>1</sup>H NMR (400 MHz, CDCl<sub>3</sub>)

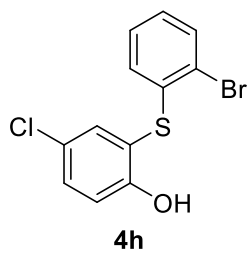

7.56  
7.56  
7.54  
7.54  
7.52  
7.52  
7.39  
7.39  
7.37  
7.36  
7.17  
7.17  
7.15  
7.15  
7.13  
7.13  
7.06  
7.06  
7.06  
7.04  
7.04  
7.03  
7.03  
7.02  
6.65  
6.65  
6.63

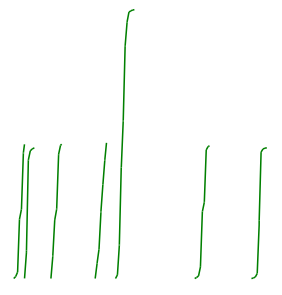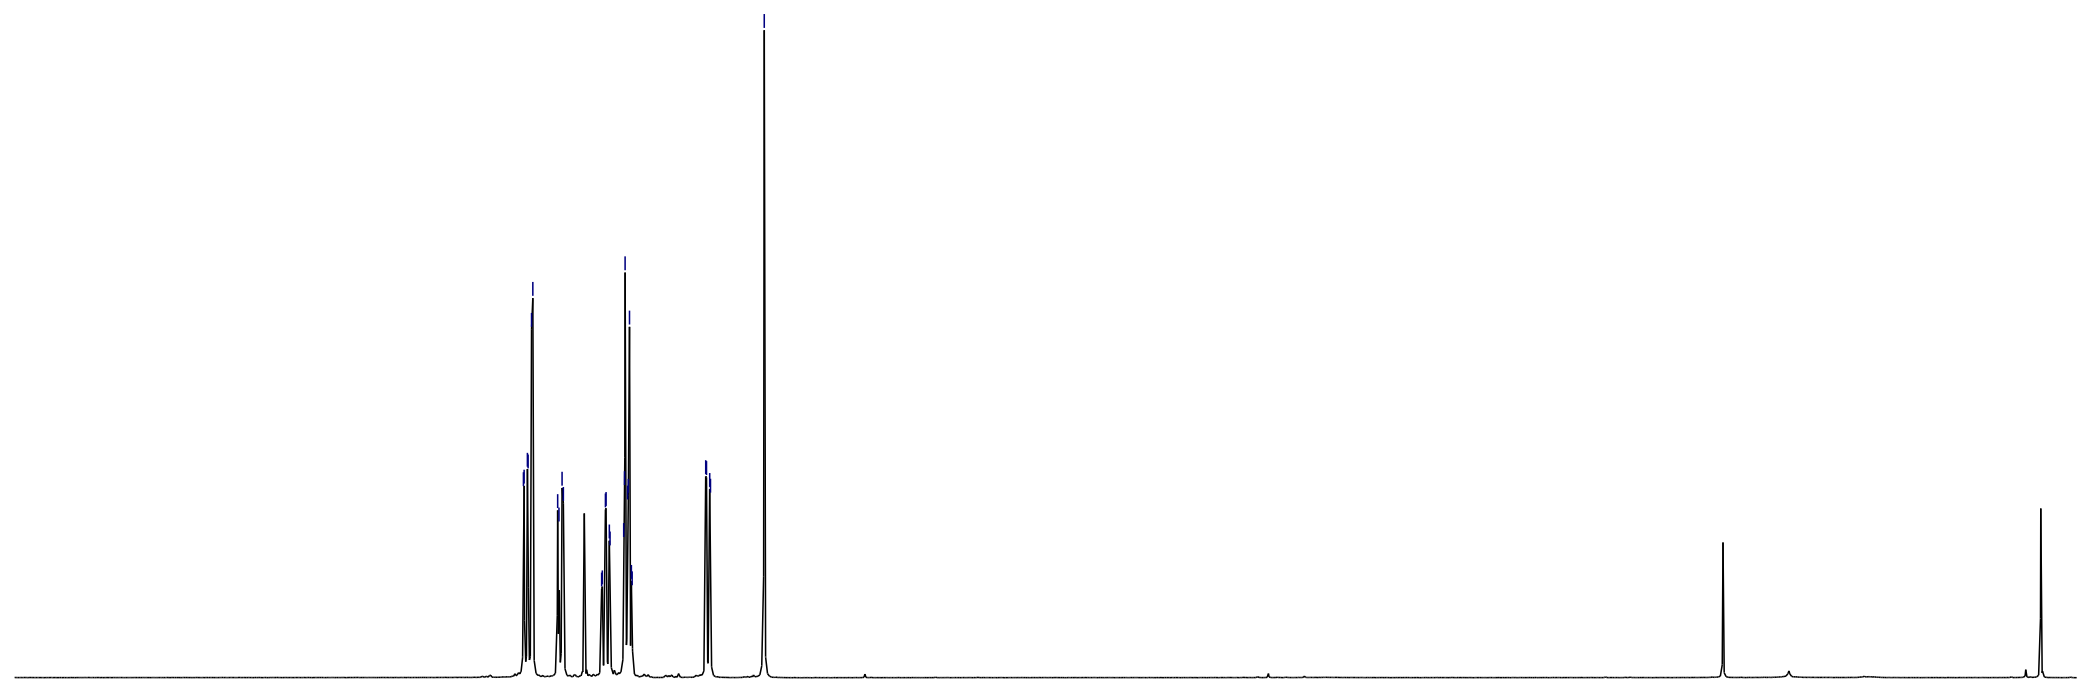

1.00  
0.97  
1.00  
1.01  
2.00  
0.99  
0.97

10.0 9.5 9.0 8.5 8.0 7.5 7.0 6.5 6.0 5.5 5.0 4.5 4.0 3.5 3.0 2.5 2.0 1.5 1.0 0.5 0.0

f1 (ppm)



$^{13}\text{C}$  NMR (101 MHz,  $\text{CDCl}_3$ )

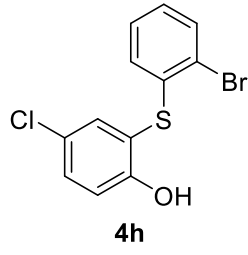

- 156.31
- 136.40
- 136.19
- 133.27
- 132.92
- 128.35
- 127.61
- 127.24
- 125.90
- 121.58
- 117.24
- 117.07

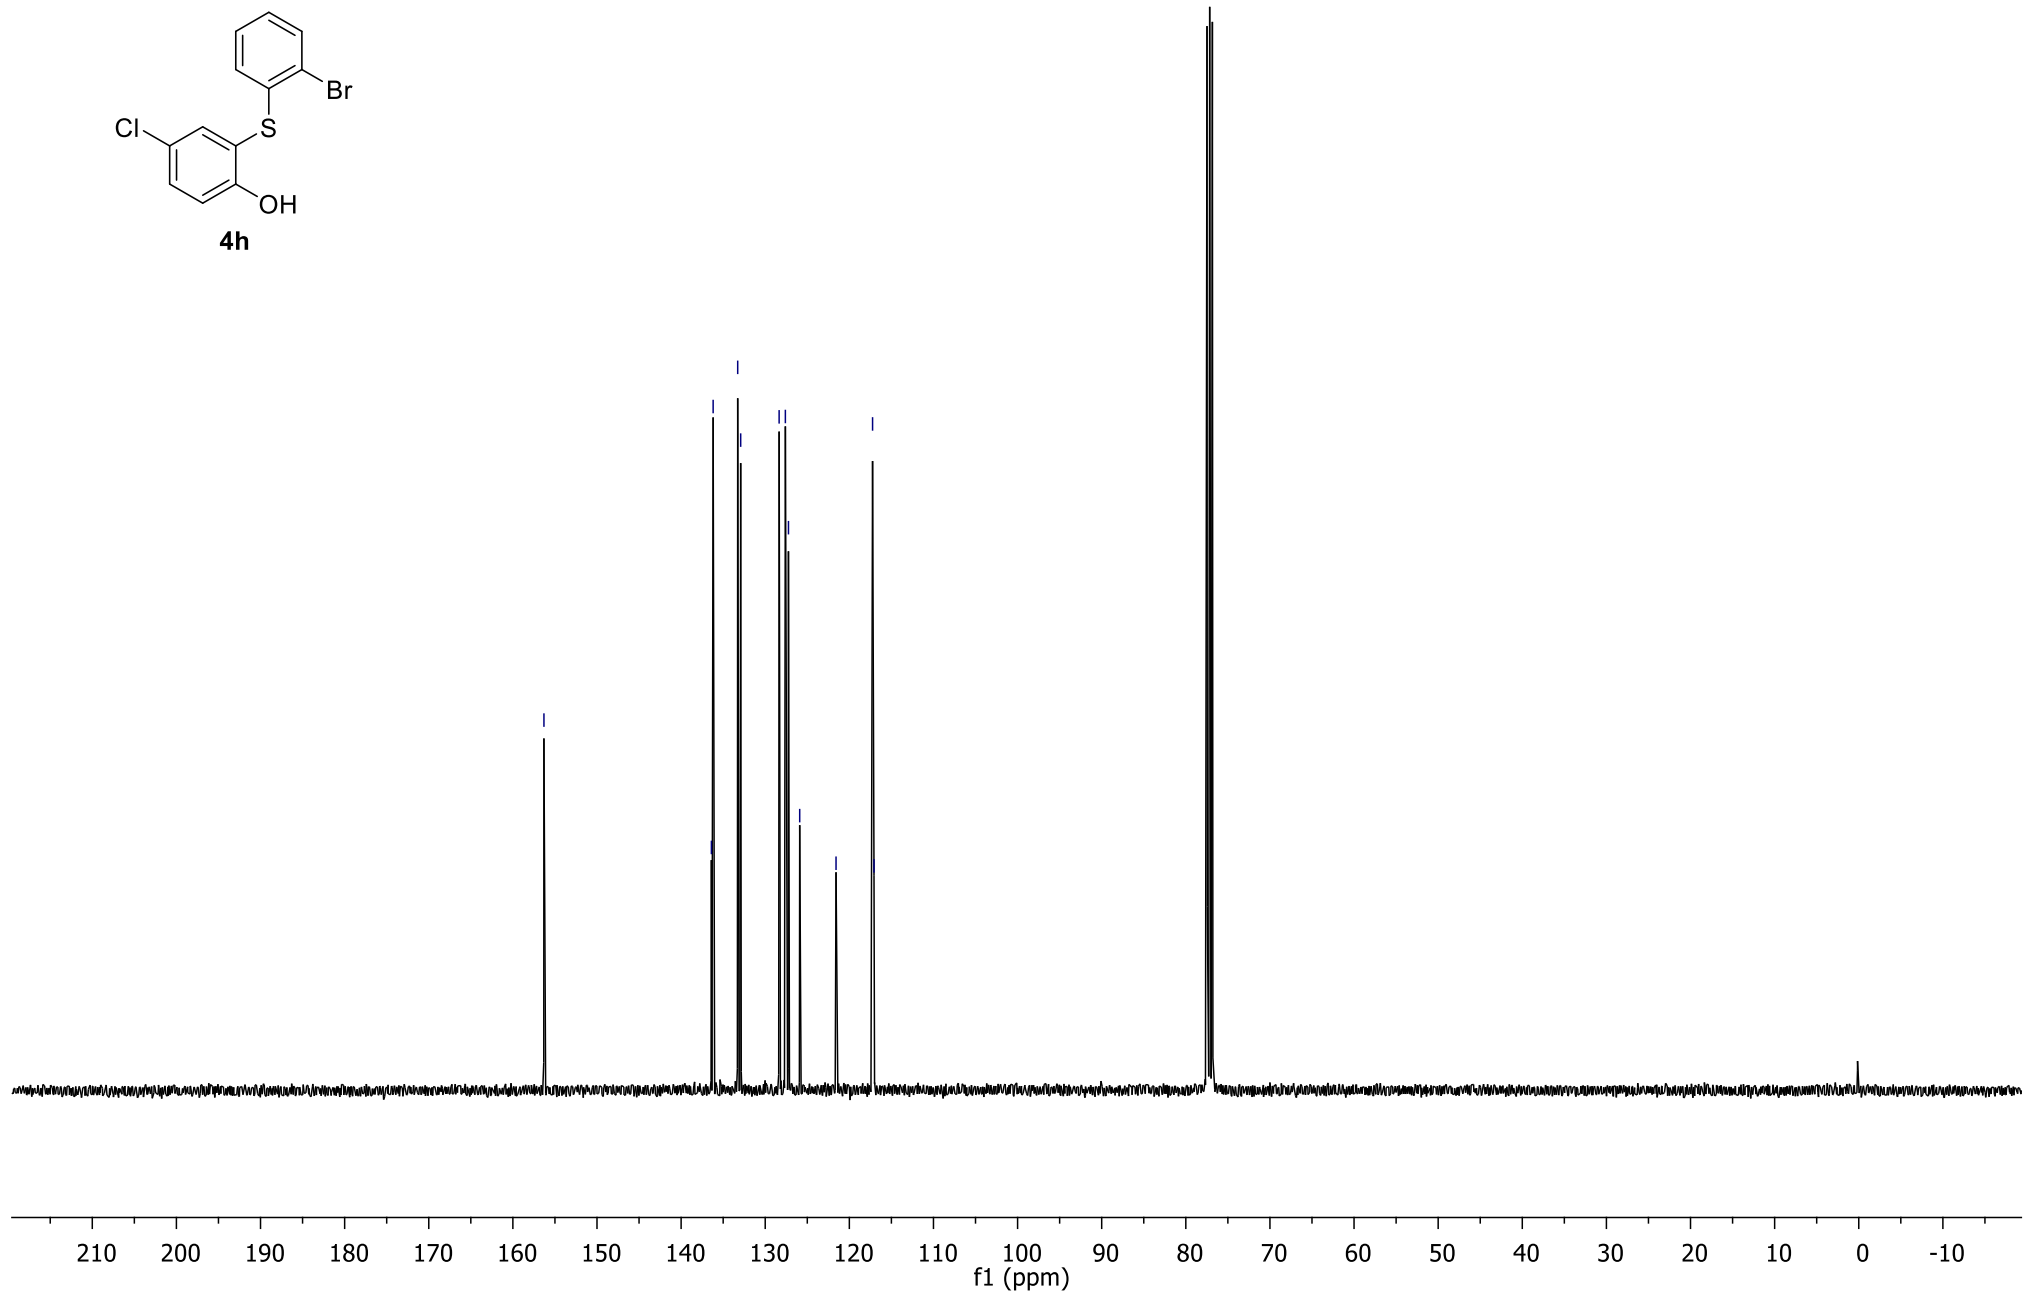

<sup>1</sup>H NMR (400 MHz, CDCl<sub>3</sub>)

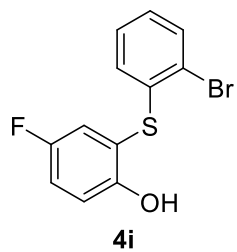

7.57  
7.56  
7.55  
7.54  
7.15  
7.07  
7.06  
6.84  
6.67  
6.65  
6.65  
6.20

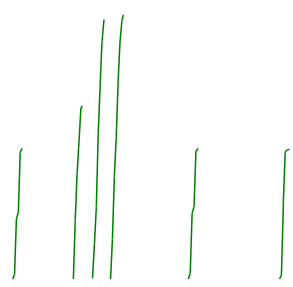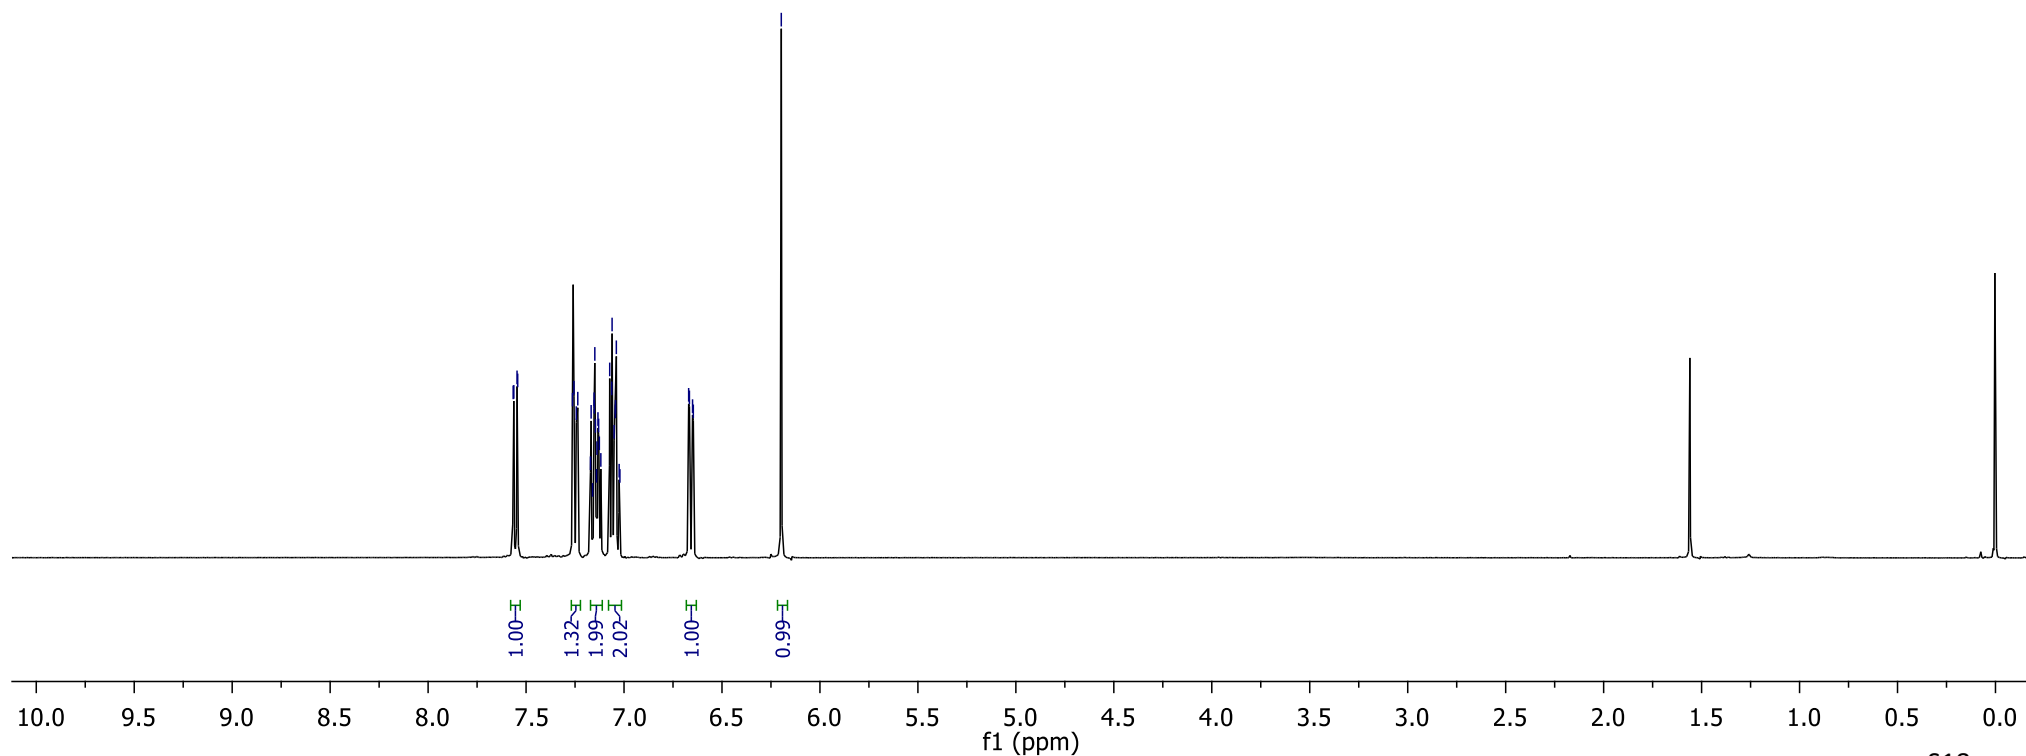

<sup>13</sup>C NMR (101 MHz, CDCl<sub>3</sub>)

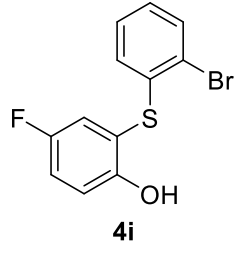

- 157.88
- 155.48
- 153.98
- 153.96
- 136.52
- 133.29
- 128.33
- 127.60
- 127.29
- 122.77
- 122.54
- 121.65
- 120.01
- 119.78
- 116.84
- 116.77
- 116.29
- 116.20

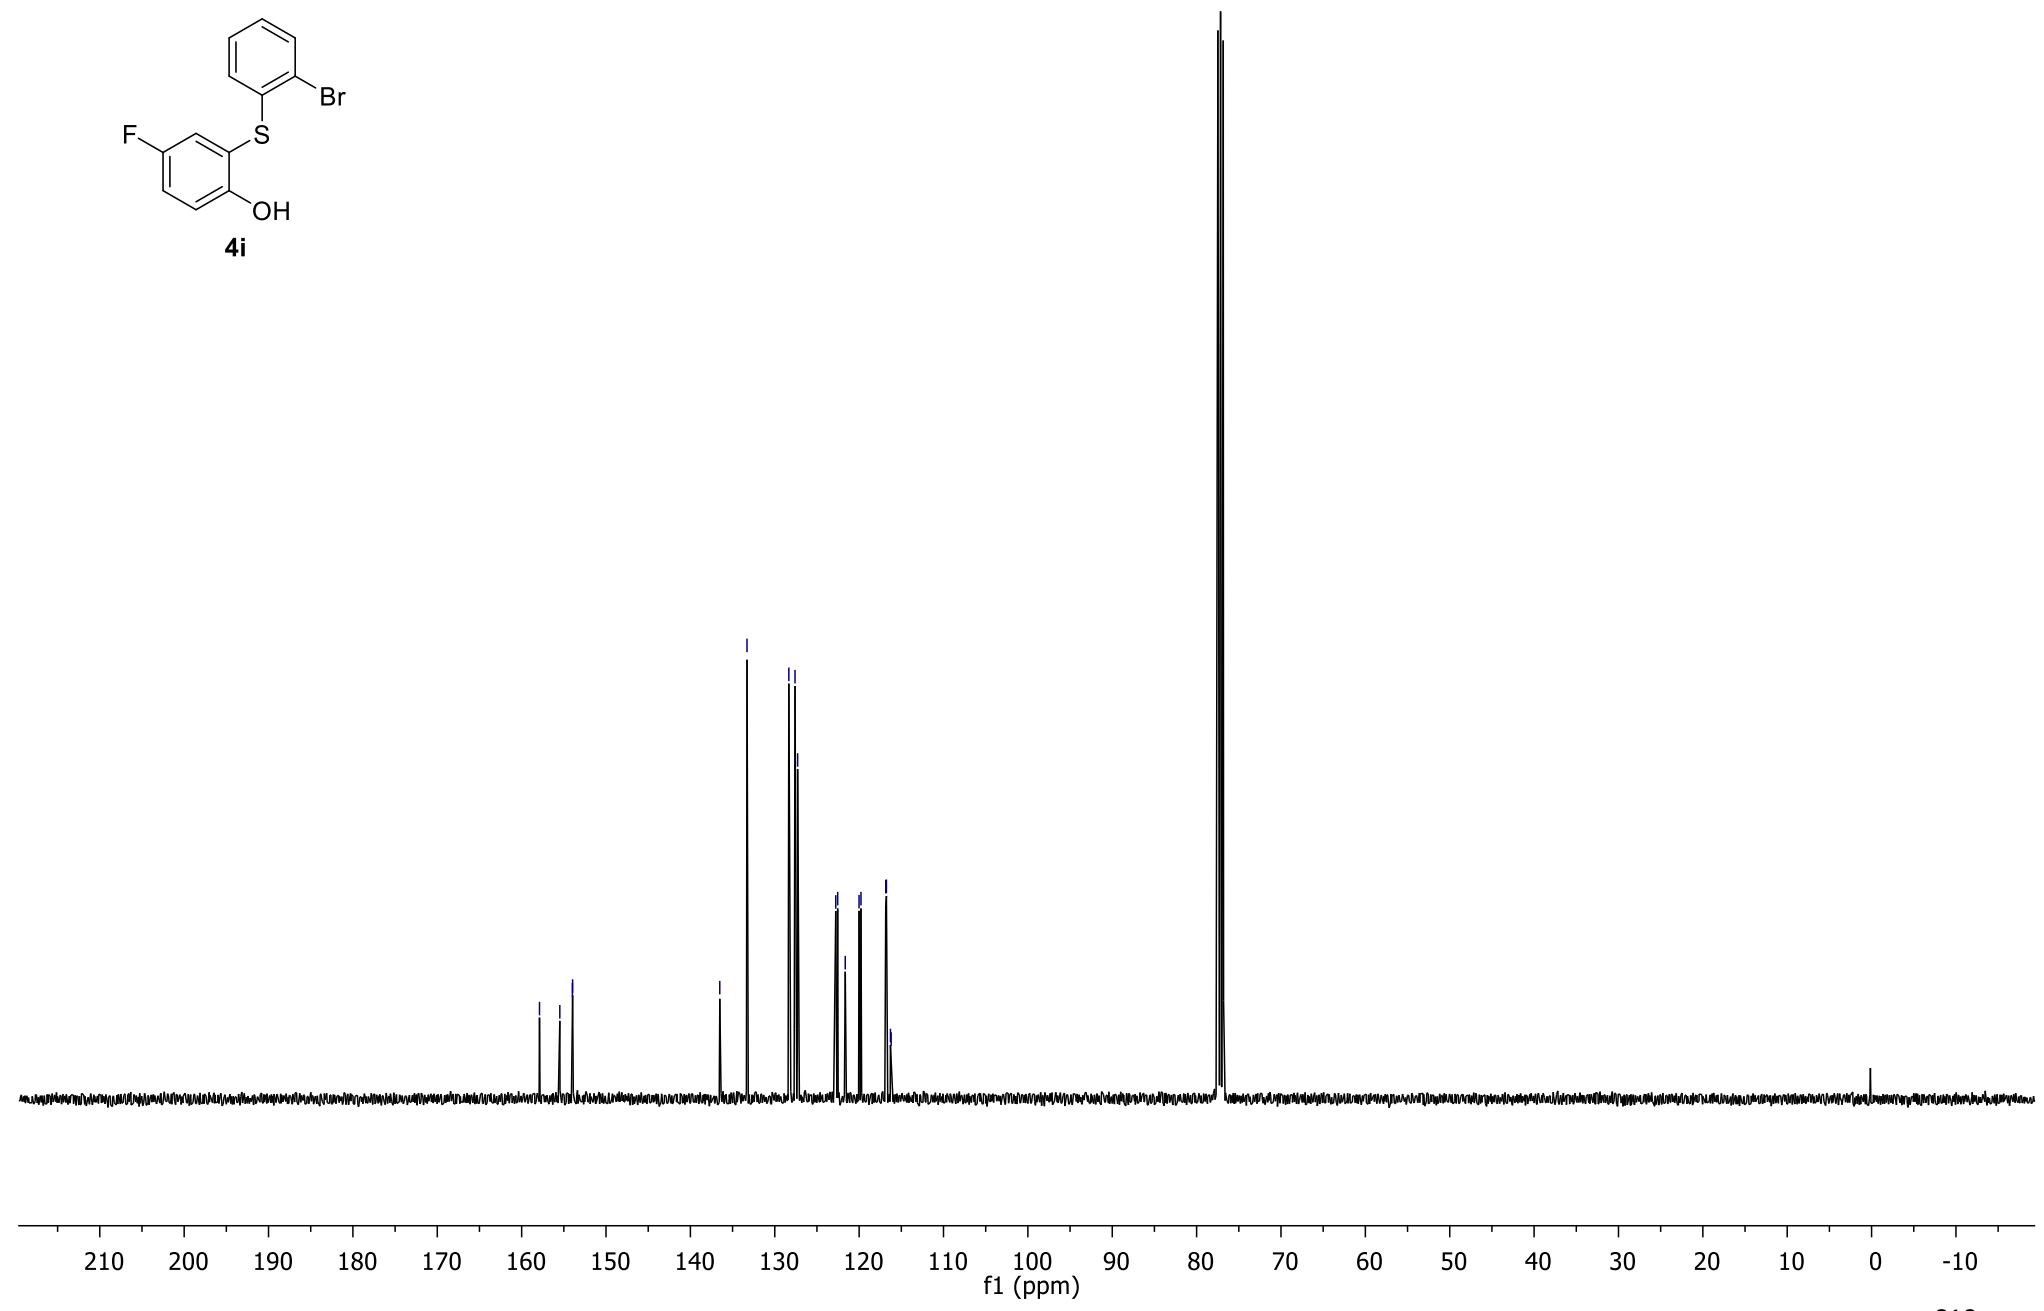

<sup>1</sup>H NMR (400 MHz, CDCl<sub>3</sub>)

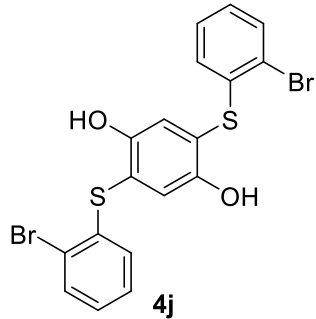

7.59  
7.58  
7.57  
7.56  
7.24  
7.20  
7.19  
7.18  
7.07  
7.07  
6.82  
6.81  
8.88

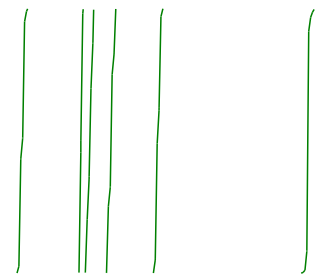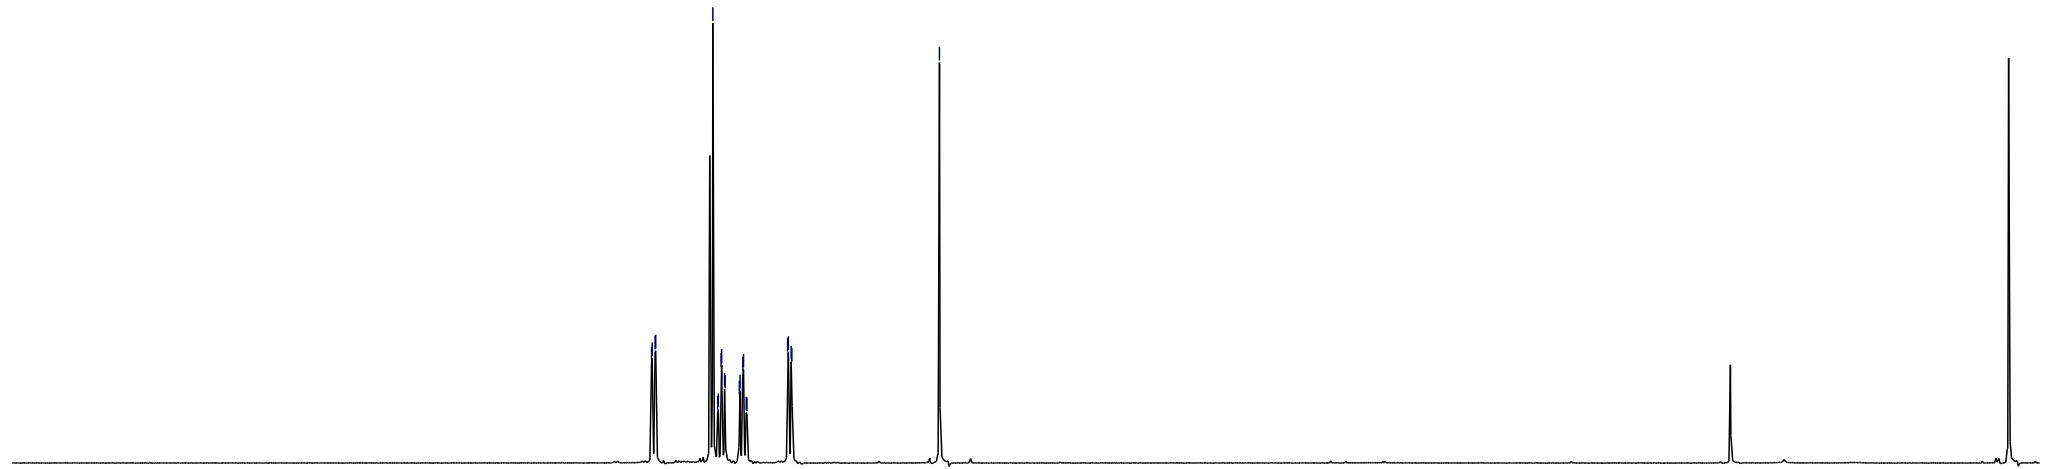

2.00  
2.00  
1.99  
2.00  
2.00  
2.00

11.0 10.5 10.0 9.5 9.0 8.5 8.0 7.5 7.0 6.5 6.0 5.5 5.0 4.5 4.0 3.5 3.0 2.5 2.0 1.5 1.0 0.5 0.0

f1 (ppm)

S20

$^{13}\text{C}$  NMR (101 MHz,  $\text{CDCl}_3$ )

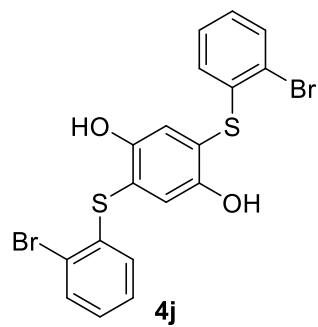

151.14

136.11  
133.38  
128.41  
128.14  
127.91  
122.53  
122.29  
120.57

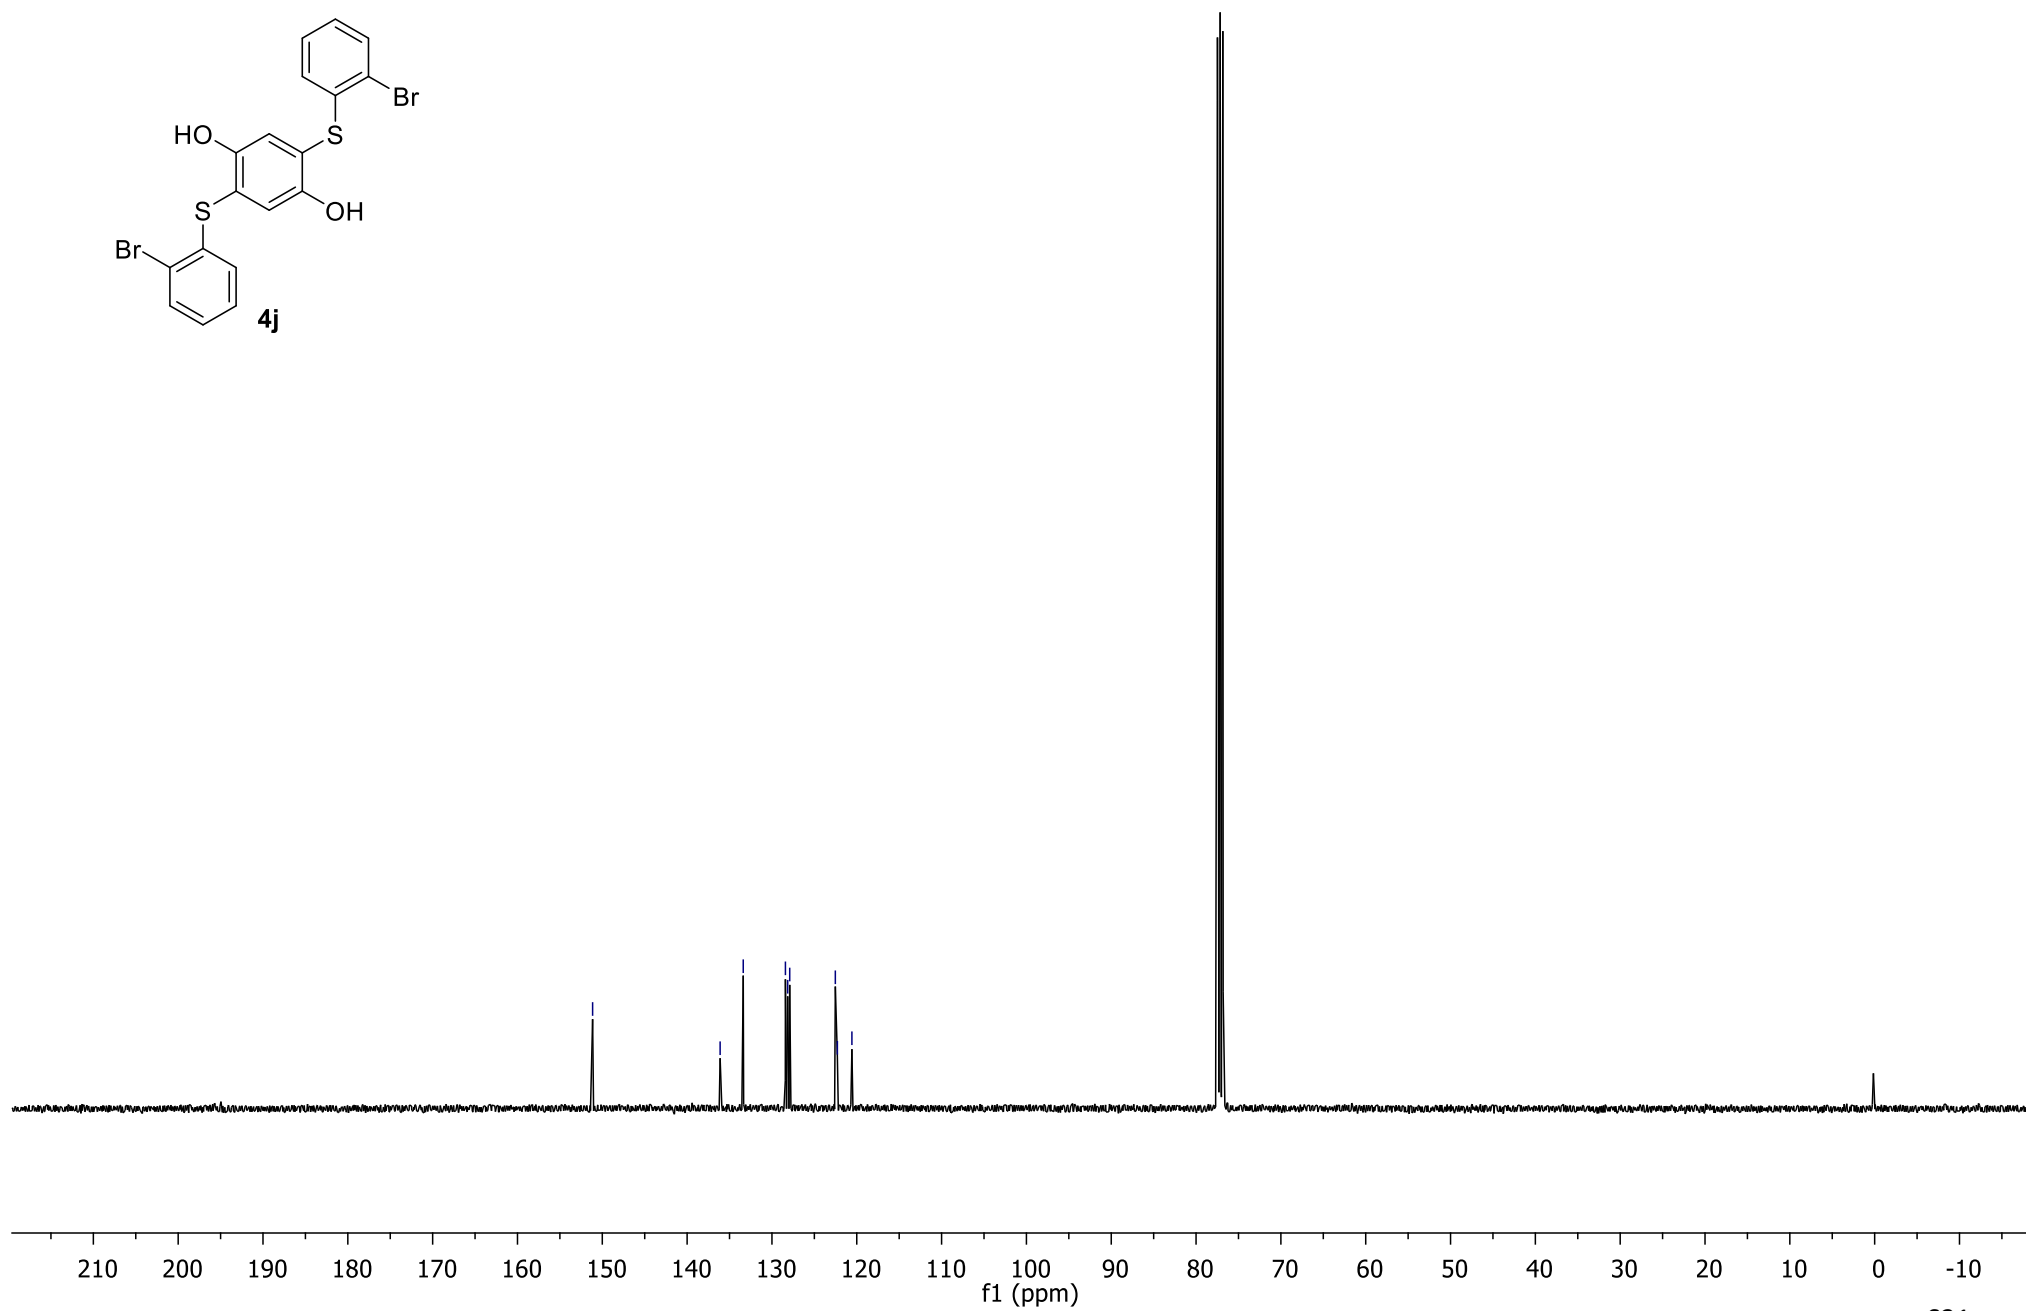

<sup>1</sup>H NMR (500 MHz, CDCl<sub>3</sub>)

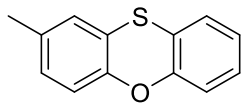

5a

7.13  
7.12  
7.10  
7.08  
7.01  
7.00  
6.99  
6.98  
6.92  
6.91  
6.90  
6.88

2.26

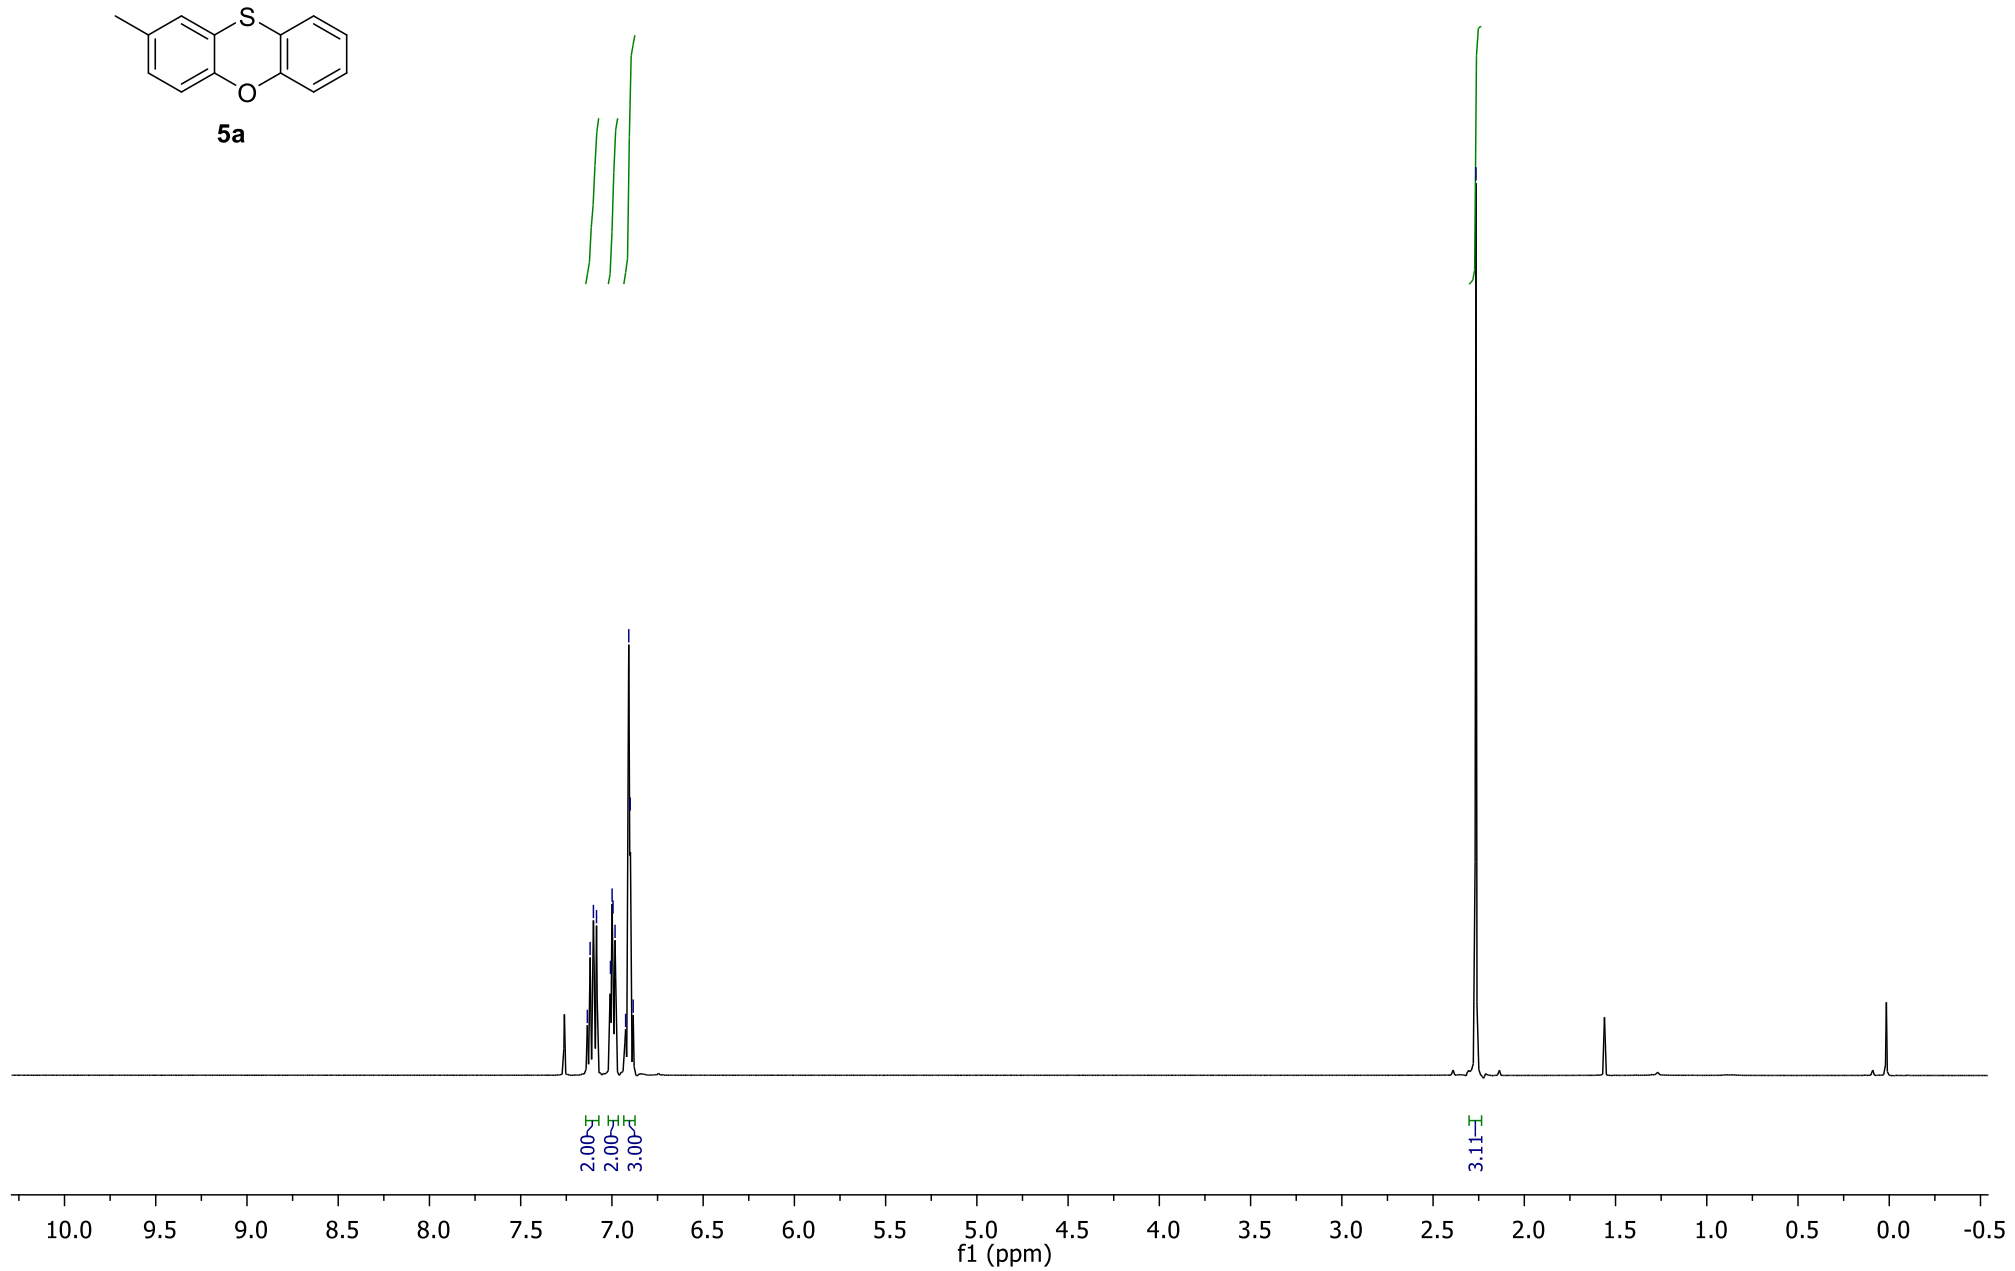

$^{13}\text{C}$  NMR (126 MHz,  $\text{CDCl}_3$ )

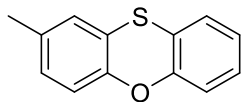

5a

152.45  
150.04  
134.27  
128.36  
127.73  
127.15  
126.89  
124.44  
120.27  
119.71  
117.85  
117.54

20.68

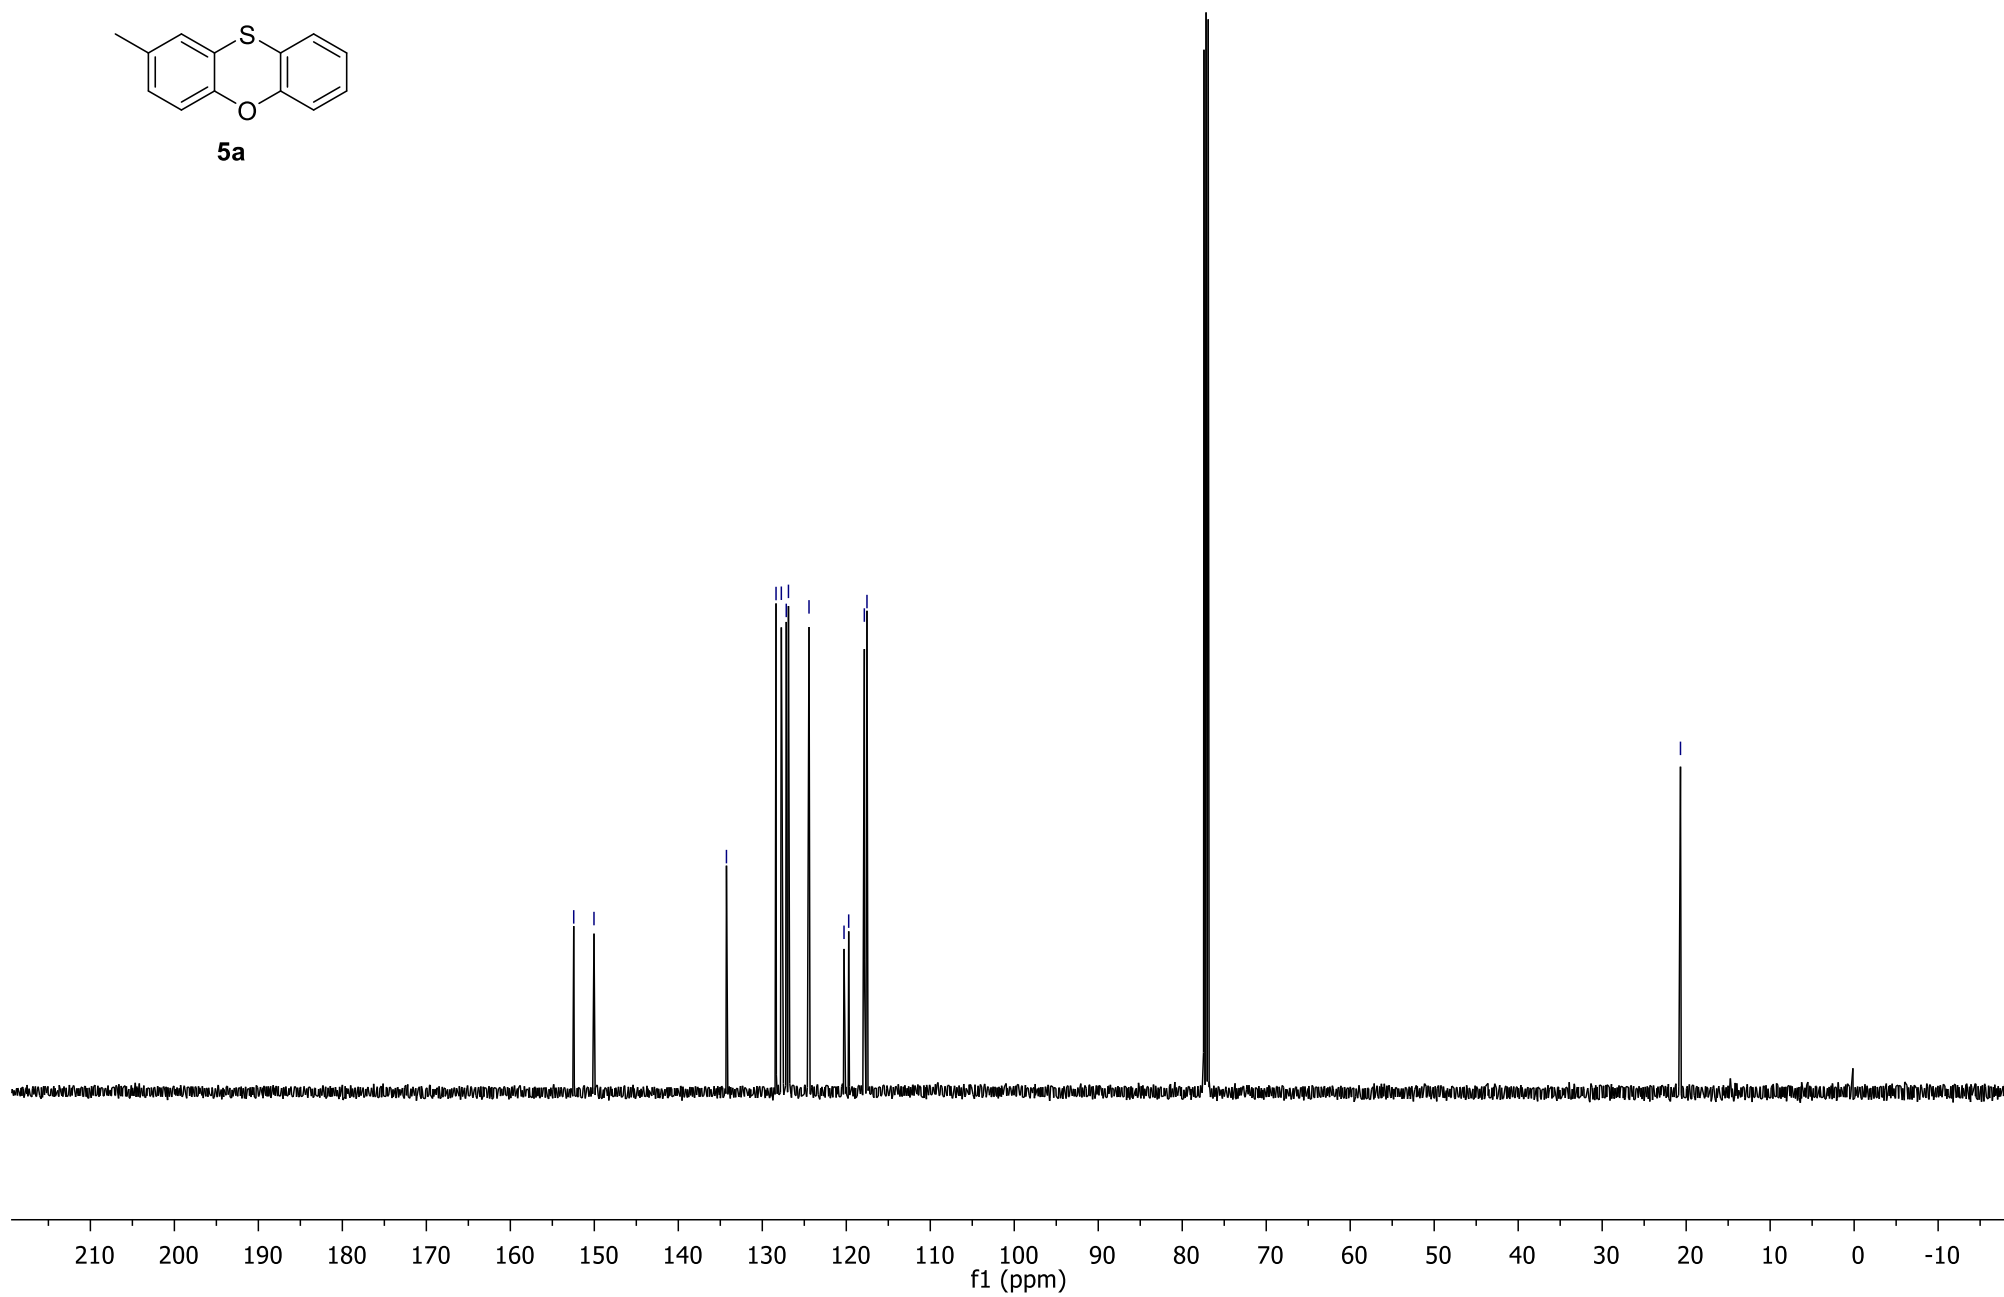

<sup>1</sup>H NMR (400 MHz, CDCl<sub>3</sub>)

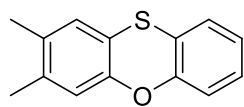

**5b**

7.13  
7.12  
7.11  
7.10  
7.10  
7.09  
7.09  
7.08  
7.07  
7.07  
7.00  
7.00  
6.99  
6.98  
6.98  
6.97  
6.96  
6.96  
6.85  
6.81

2.20  
2.17

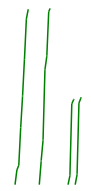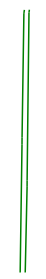

2.00  
2.01  
0.98  
1.00

3.00  
3.00

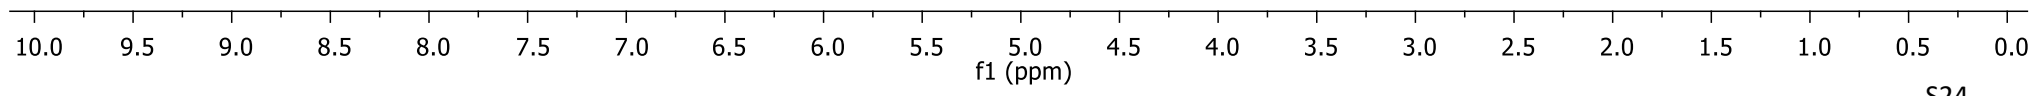



<sup>13</sup>C NMR (101 MHz, CDCl<sub>3</sub>)



**5b**

152.52  
150.06

136.41  
132.92  
127.60  
127.44  
126.91  
124.33  
120.57  
118.90  
117.83  
116.20

19.56  
19.01

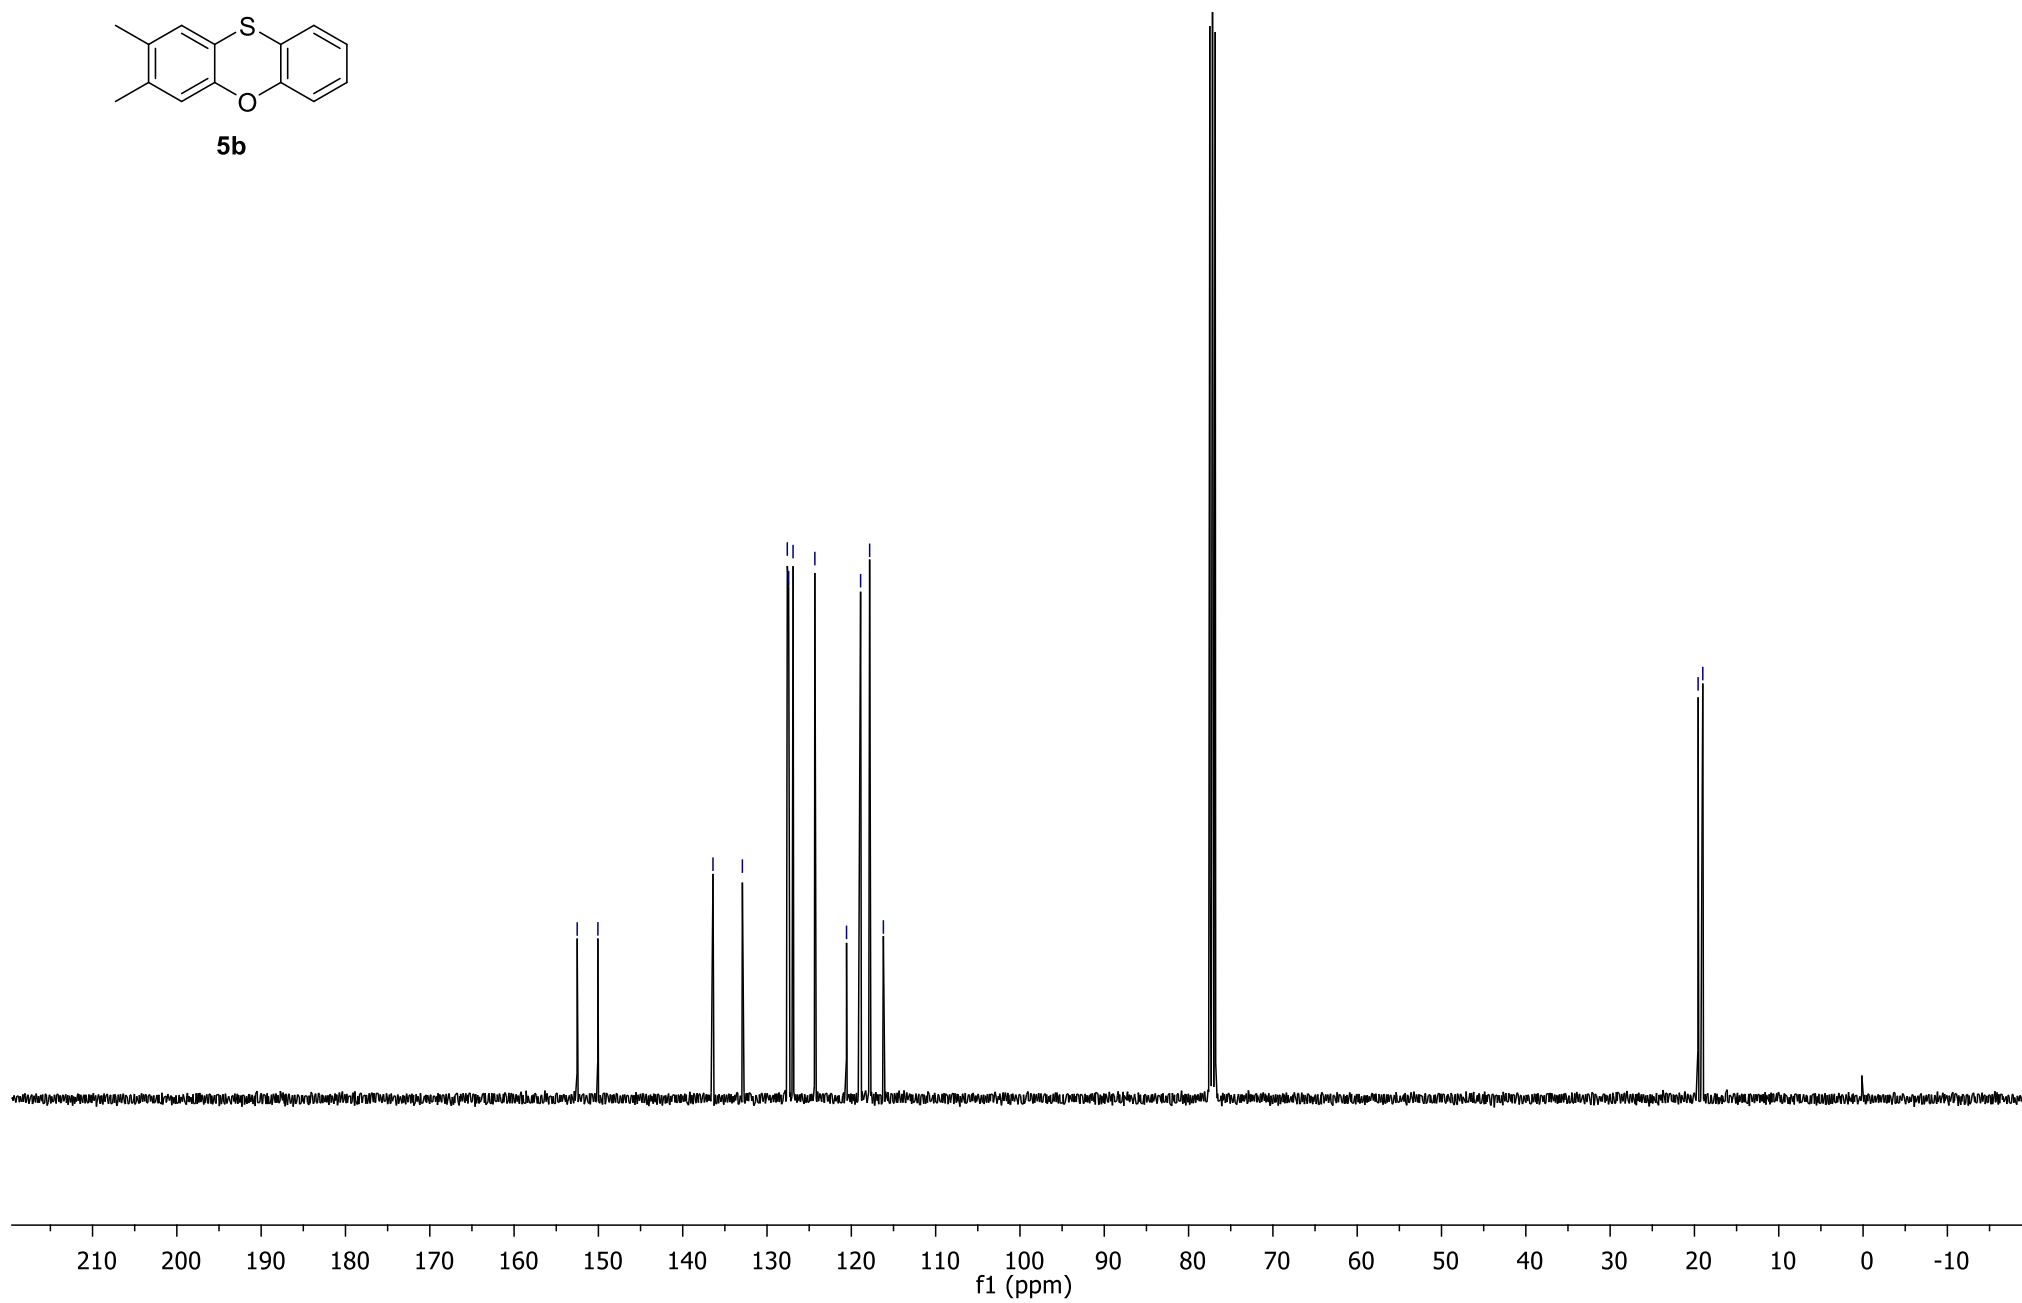

<sup>1</sup>H NMR (400 MHz, CDCl<sub>3</sub>)

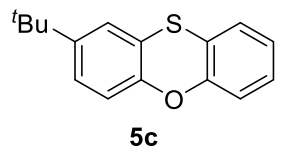

7.16  
7.15  
7.14  
7.14  
7.13  
7.12  
7.12  
7.11  
7.11  
7.10  
7.10  
7.09  
7.02  
7.01  
7.01  
7.01  
7.00  
7.00  
6.99  
6.99  
6.99  
6.98  
6.98  
6.96  
6.94

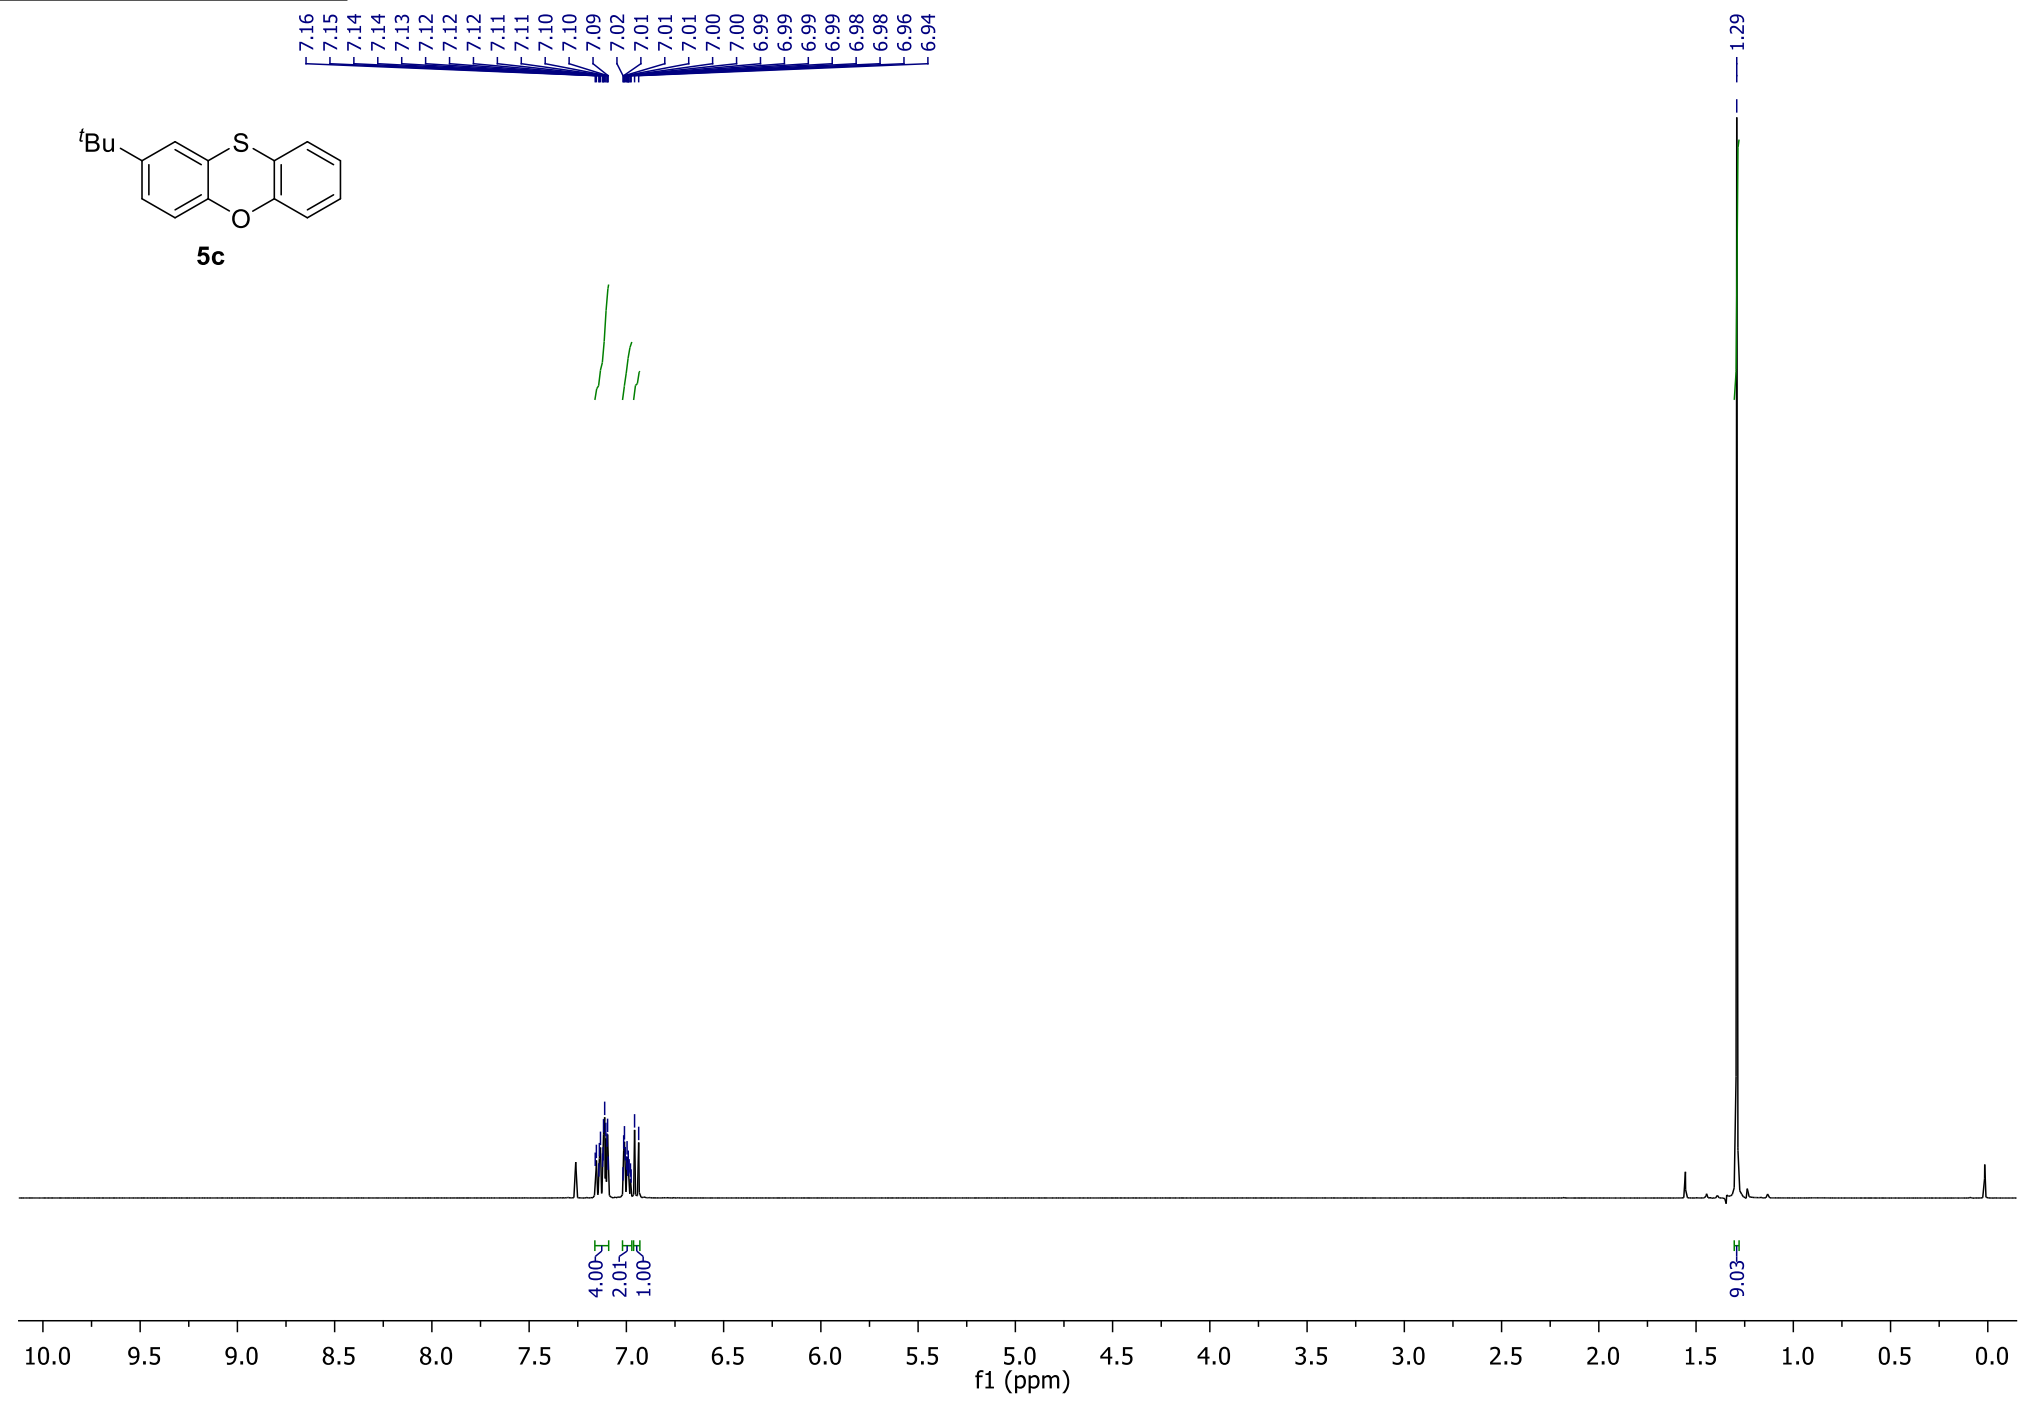

$^{13}\text{C}$  NMR (101 MHz,  $\text{CDCl}_3$ )

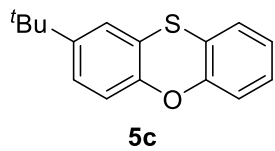

152.52  
150.01  
147.83

127.74  
126.93  
124.87  
124.46  
123.81  
120.44  
119.41  
117.87  
117.34

34.52  
31.45

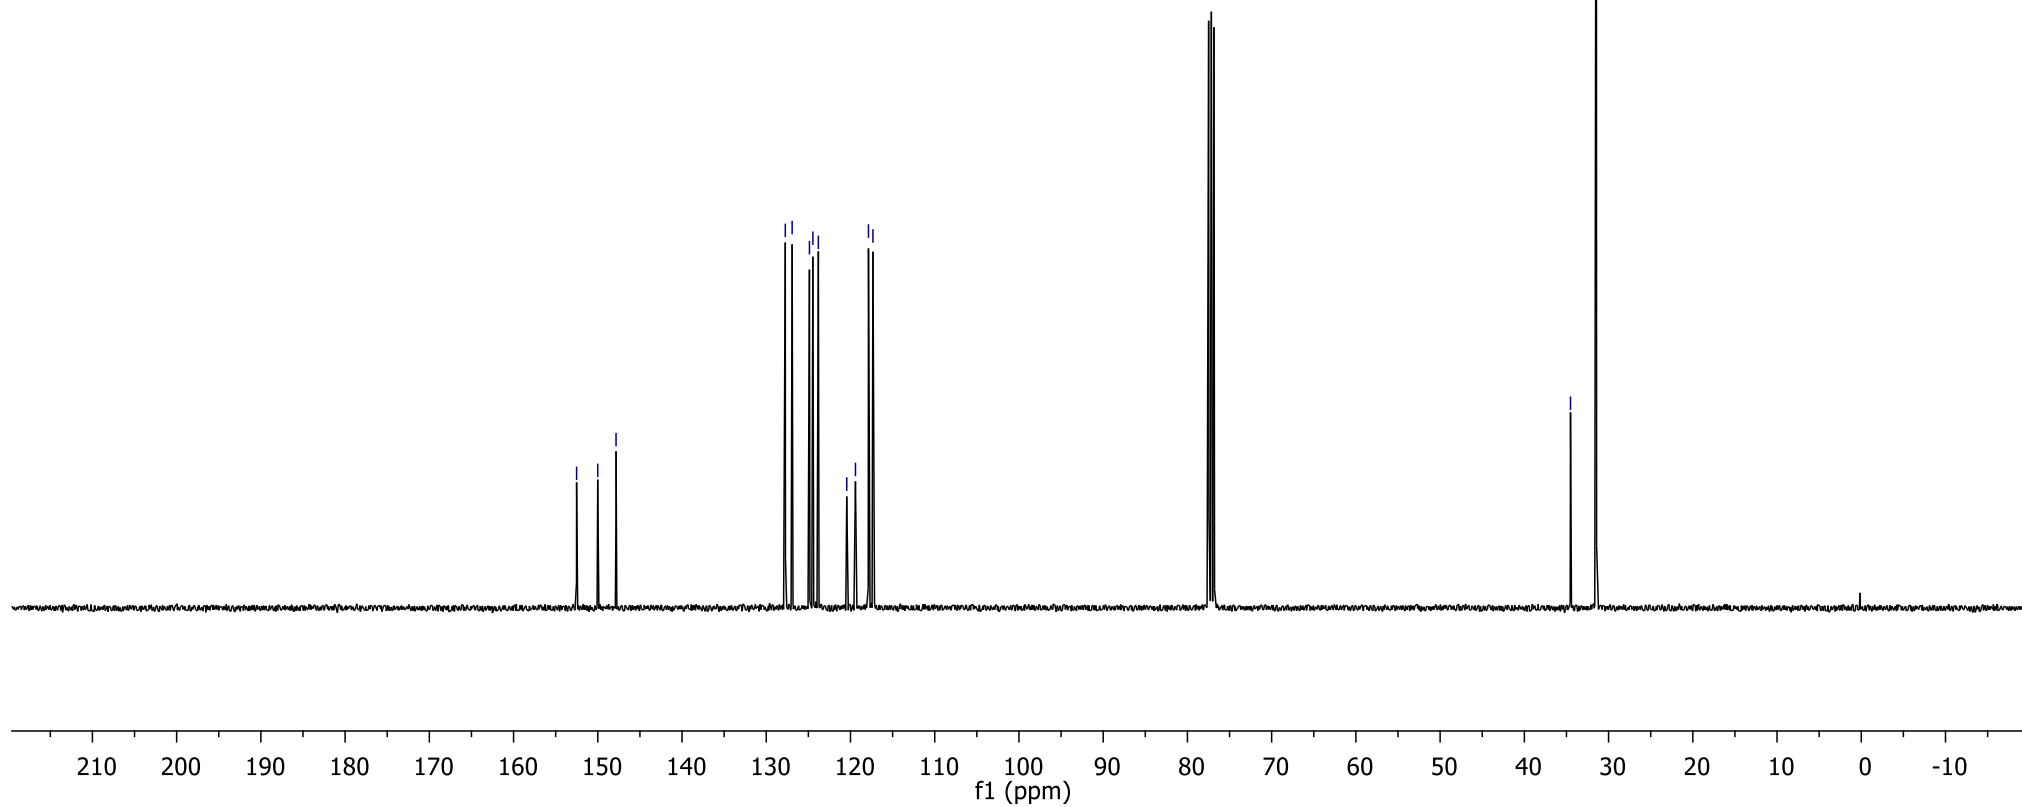

<sup>1</sup>H NMR (400 MHz, CDCl<sub>3</sub>)

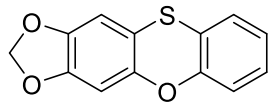

**5d**

7.16  
7.15  
7.14  
7.14  
7.13  
7.12  
7.12  
7.11  
7.10  
7.10  
7.03  
7.03  
7.02  
7.01  
7.01  
7.01  
7.00  
6.99  
6.99  
6.62  
6.57

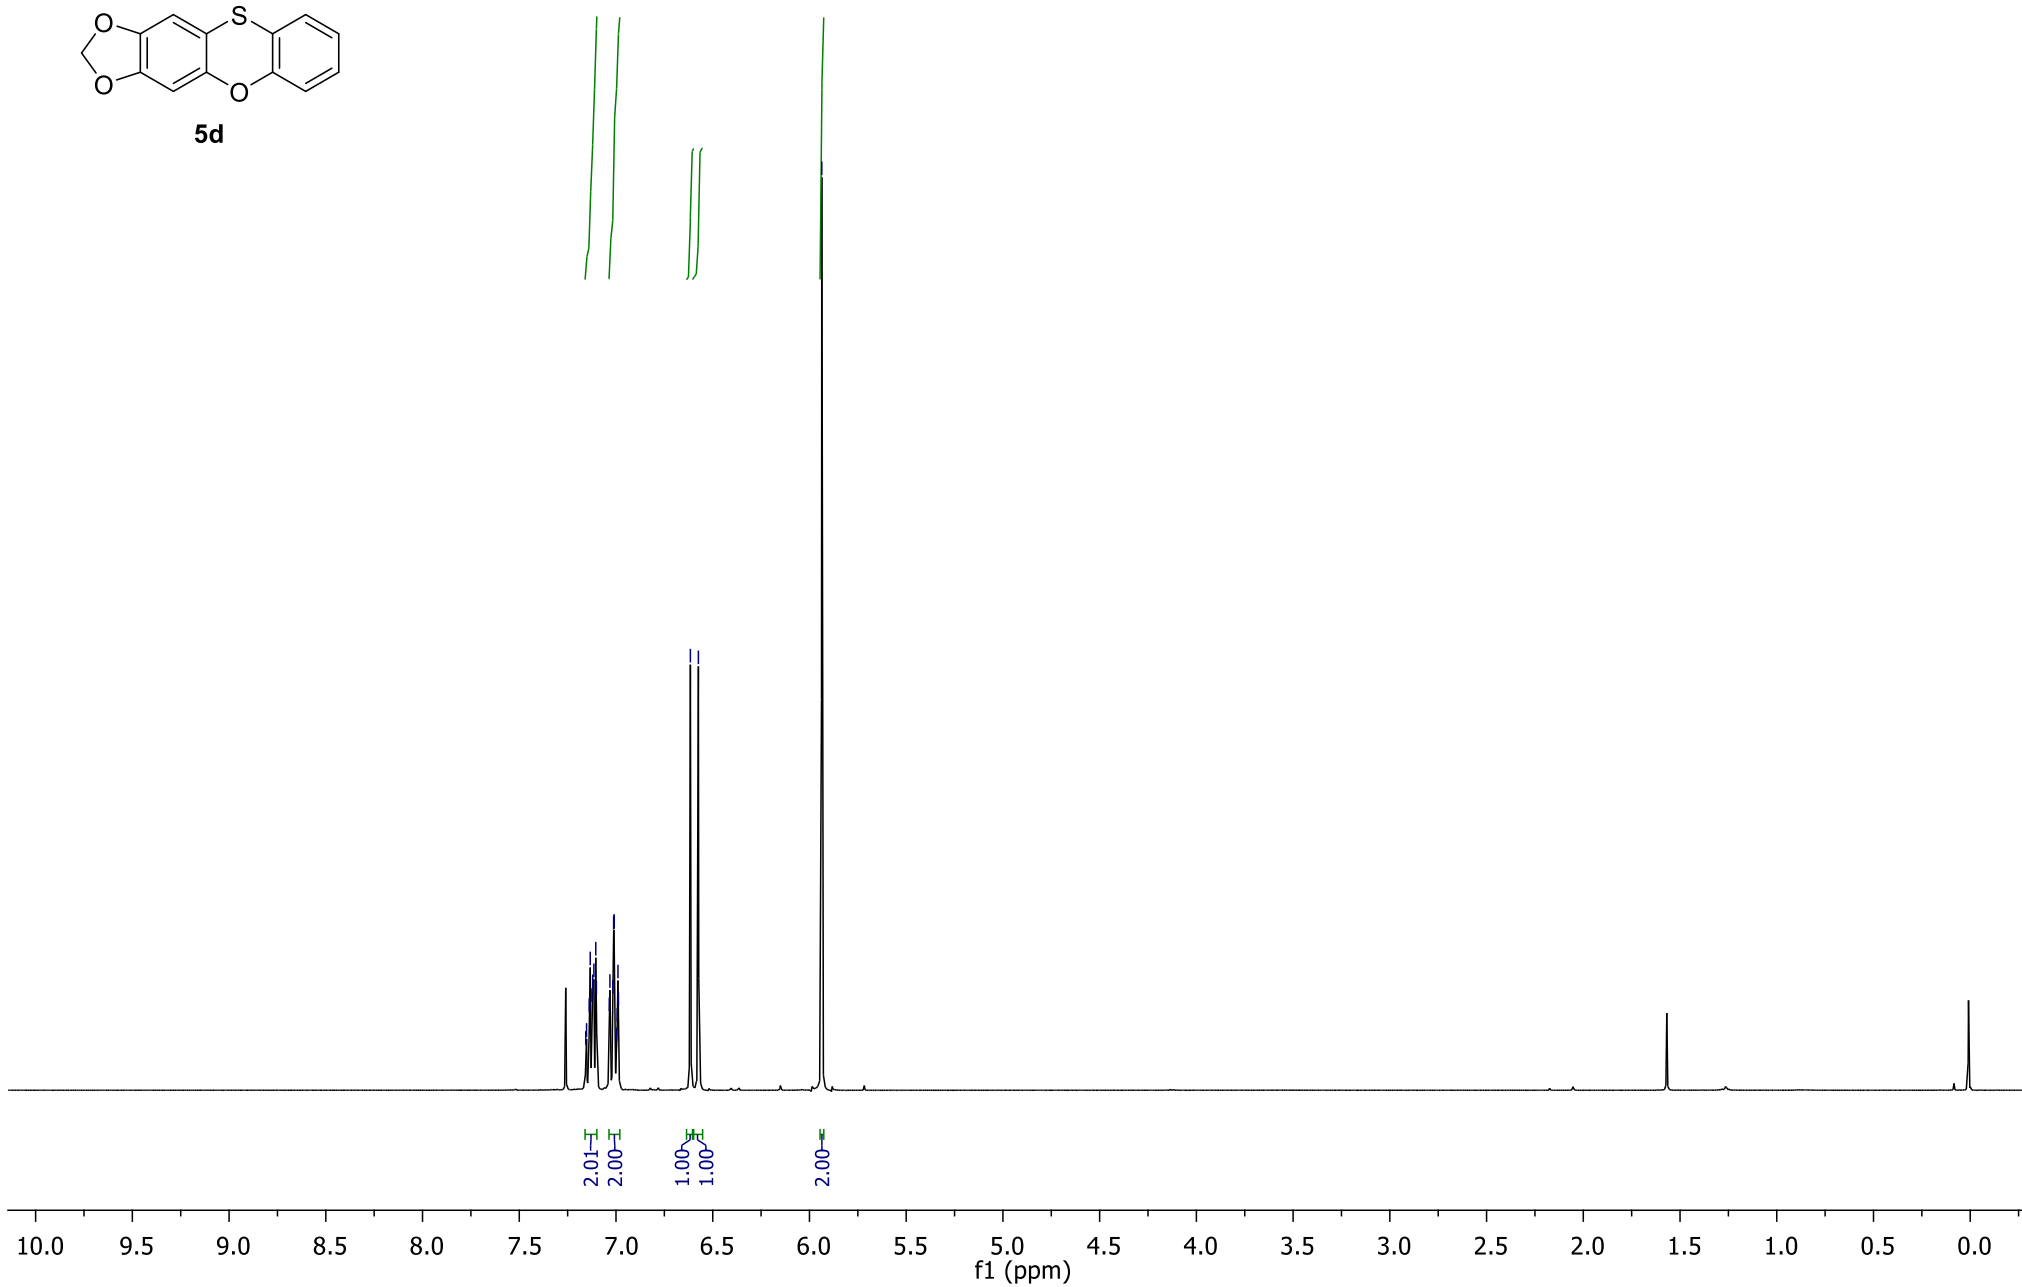

$^{13}\text{C}$  NMR (101 MHz,  $\text{CDCl}_3$ )

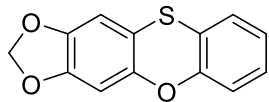

**5d**

152.89  
147.50  
147.49  
144.61  
  
127.85  
126.85  
124.68  
121.00  
117.82  
  
111.40  
106.19  
101.84  
100.61

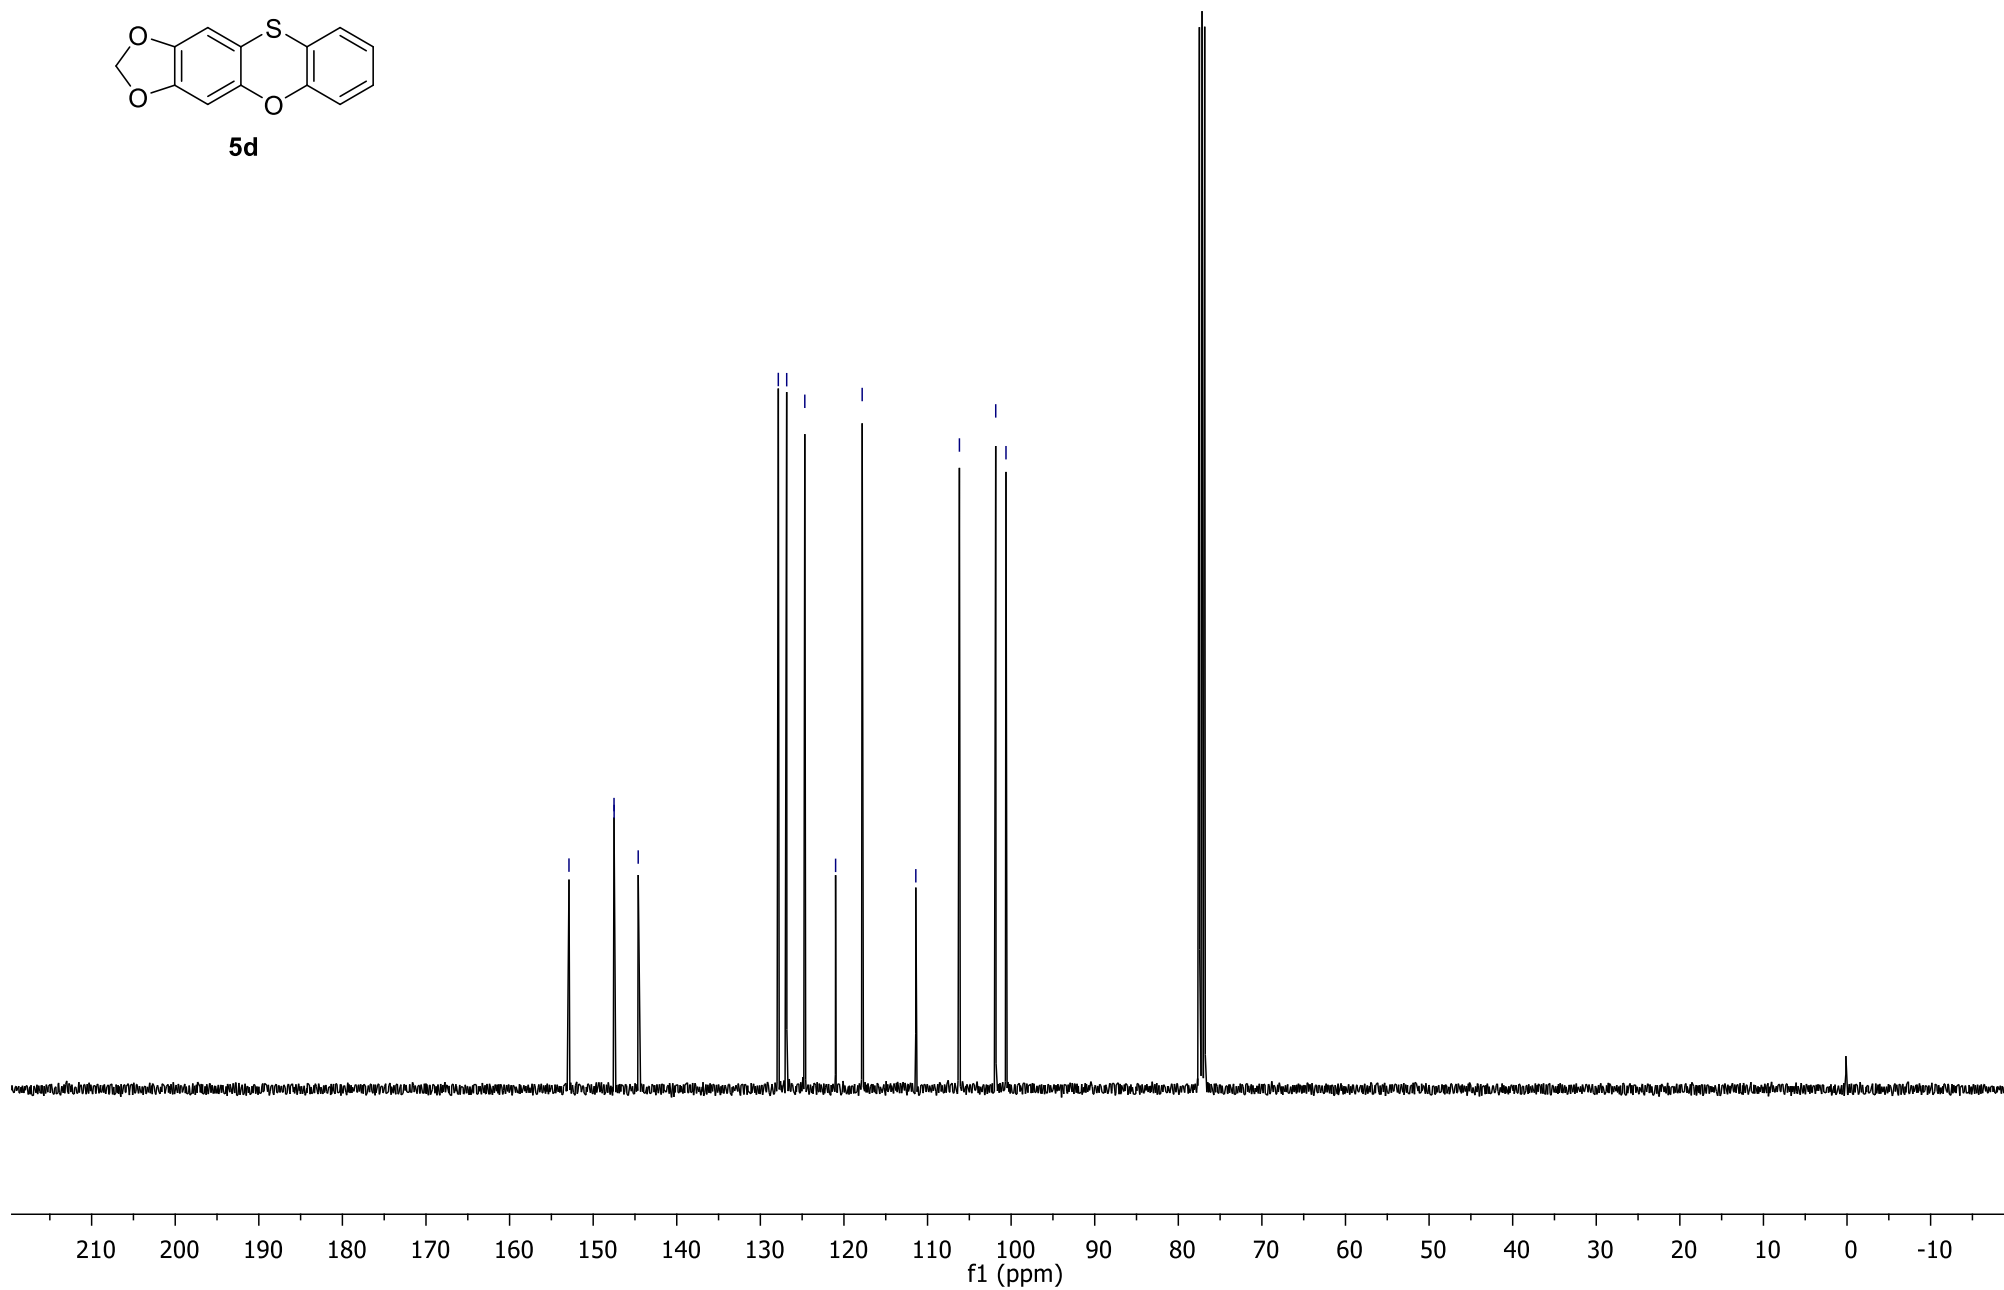

<sup>1</sup>H NMR (400 MHz, CDCl<sub>3</sub>)

7.55  
7.54  
7.54  
7.53  
7.52  
7.52  
7.46  
7.45  
7.45  
7.44  
7.43  
7.42  
7.42  
7.41  
7.37  
7.37  
7.37  
7.36  
7.35  
7.35  
7.35  
7.34  
7.34  
7.33  
7.33  
7.32  
7.32  
7.17  
7.17  
7.15  
7.15  
7.15  
7.14  
7.14  
7.13  
7.12  
7.12  
7.11  
7.11  
7.08  
7.06  
7.05  
7.04  
7.03  
7.02  
7.01  
7.01

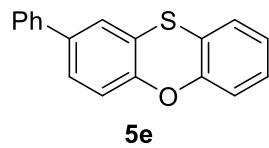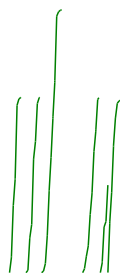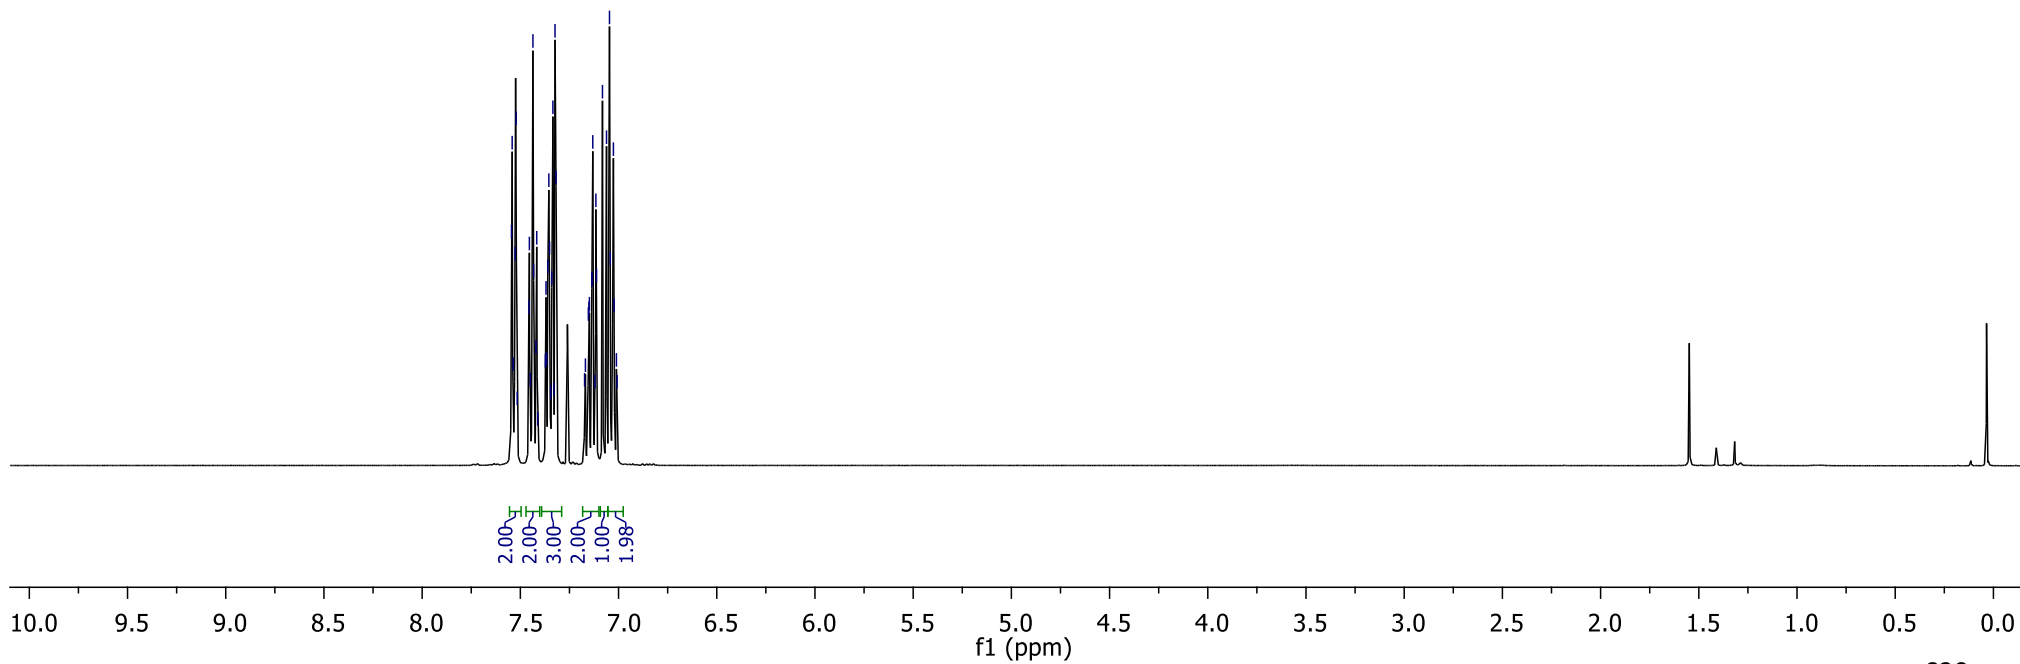

$^{13}\text{C}$  NMR (101 MHz,  $\text{CDCl}_3$ )

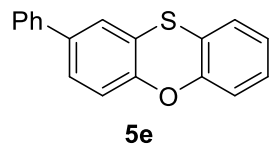

152.16  
151.61  
139.89  
137.99  
128.95  
127.88  
127.51  
126.93  
126.90  
126.56  
125.37  
124.68  
120.53  
119.92  
118.09  
117.94

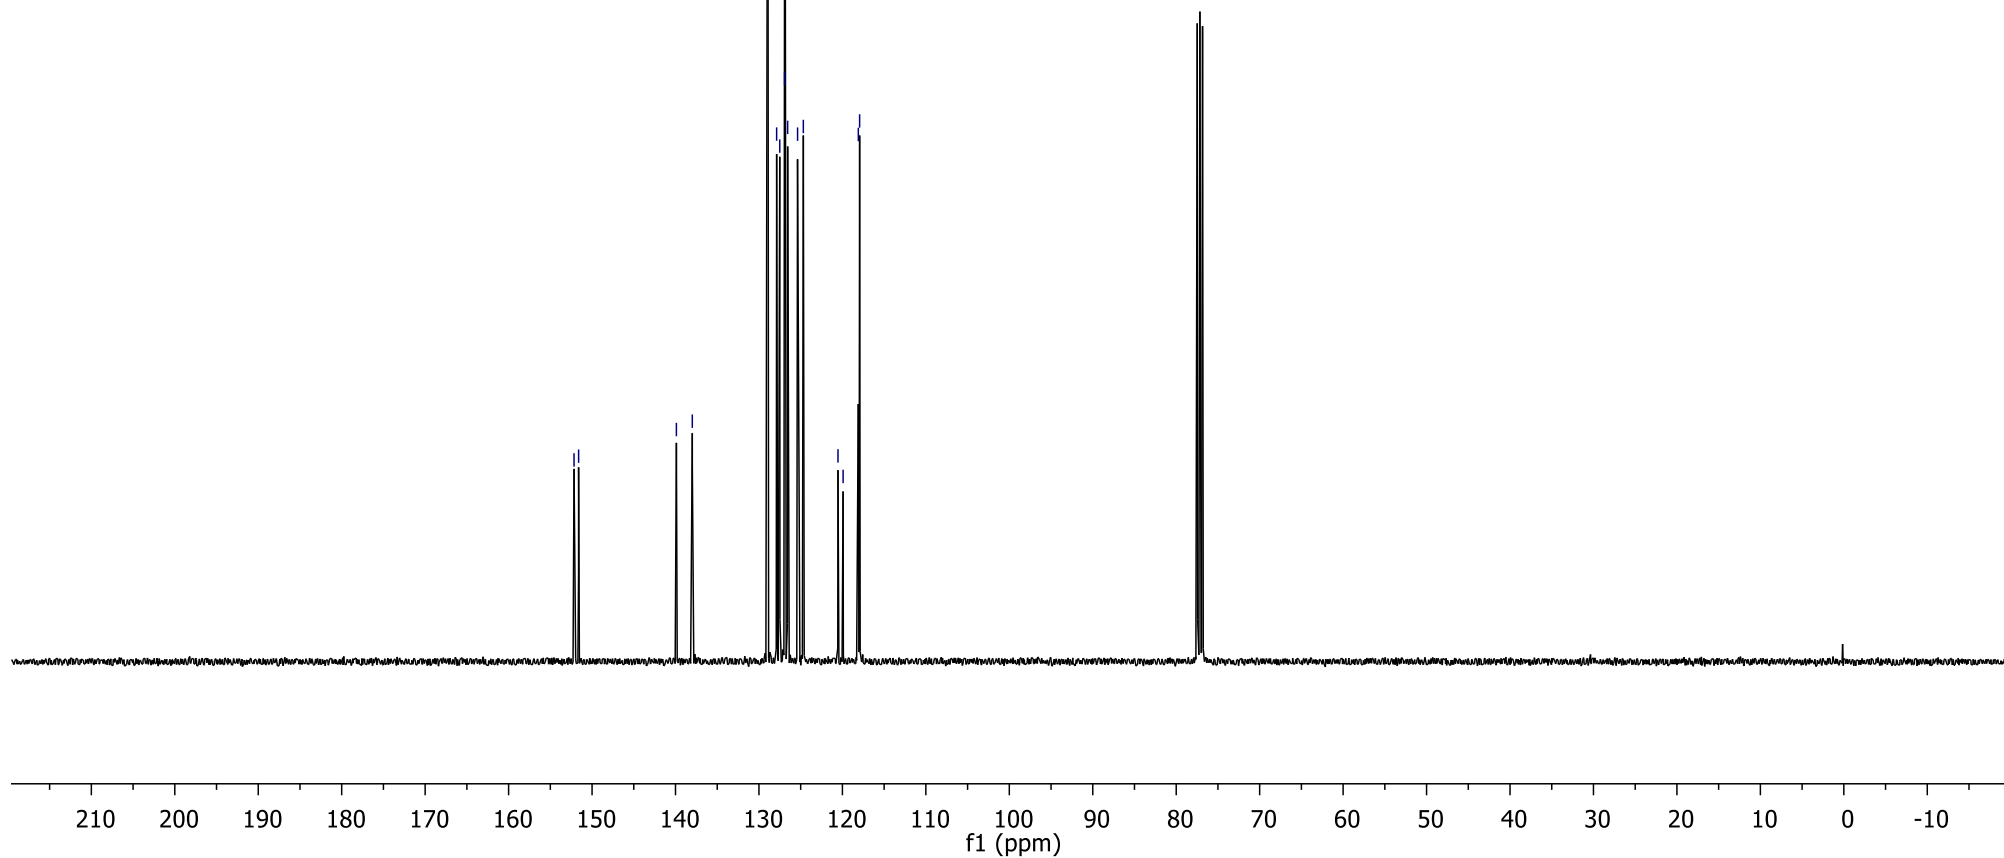

<sup>1</sup>H NMR (400 MHz, CDCl<sub>3</sub>)

7.93 7.93 7.91 7.91 7.80 7.78 7.66 7.64 7.57 7.57 7.55 7.55 7.55 7.53 7.53 7.46 7.46 7.44 7.44 7.44 7.44 7.42 7.42 7.42 7.23 7.22 7.22 7.20 7.20 7.20 7.19 7.19 7.18 7.17 7.16 7.16 7.15 7.15 7.14 7.14 7.07 7.06 7.06 7.05 7.05 7.04 7.04 7.03 7.03

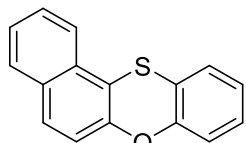

5f

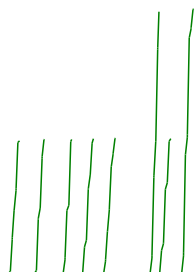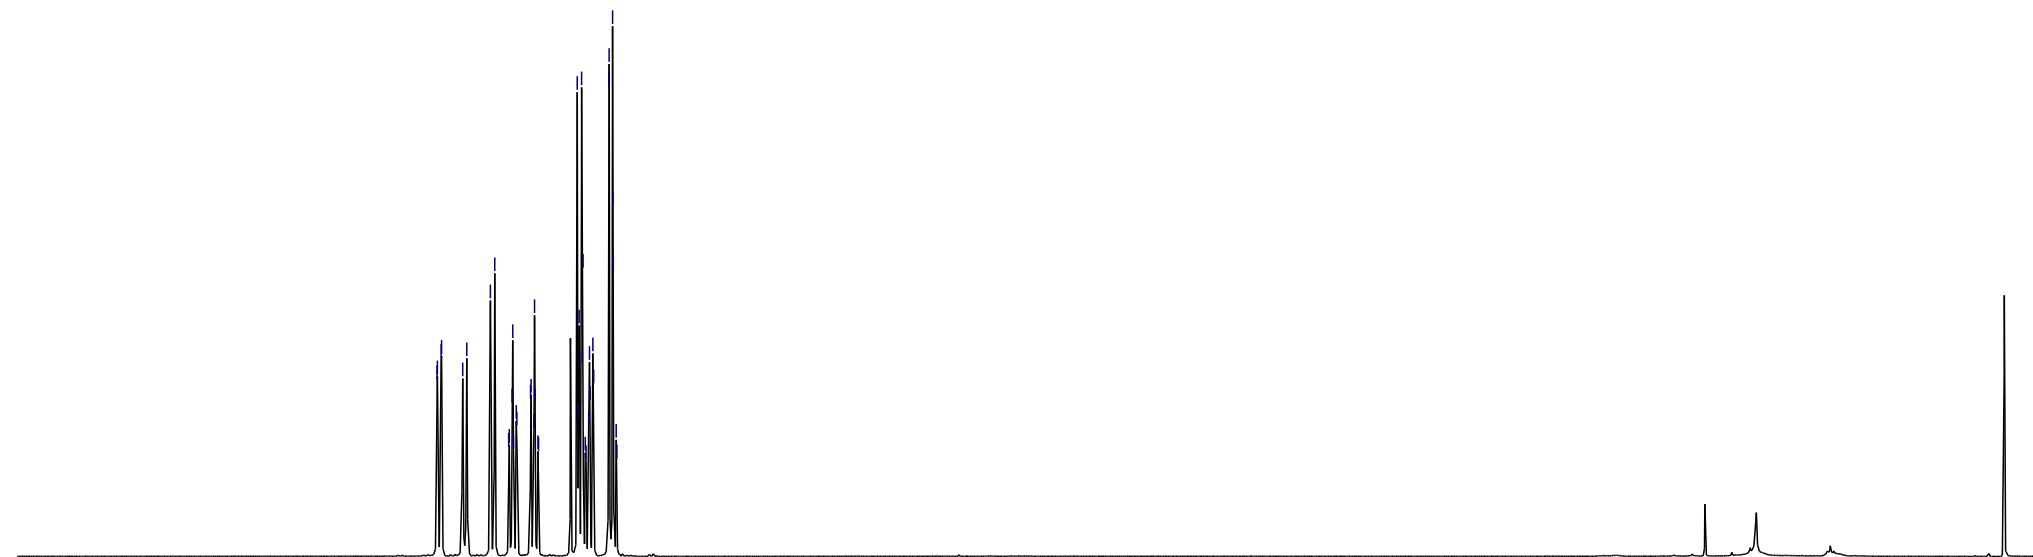

1.00 1.01 1.01 1.02 1.02 1.98 1.02 2.00

10.0 9.5 9.0 8.5 8.0 7.5 7.0 6.5 6.0 5.5 5.0 4.5 4.0 3.5 3.0 2.5 2.0 1.5 1.0 0.5 0.0

f1 (ppm)



$^{13}\text{C}$  NMR (101 MHz,  $\text{CDCl}_3$ )

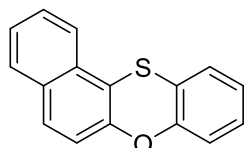

5f

152.52  
149.75  
131.13  
130.33  
128.48  
128.05  
127.78  
127.16  
126.97  
125.14  
124.82  
123.06  
119.65  
118.47  
117.80  
113.60  
77.48  
77.16  
76.84

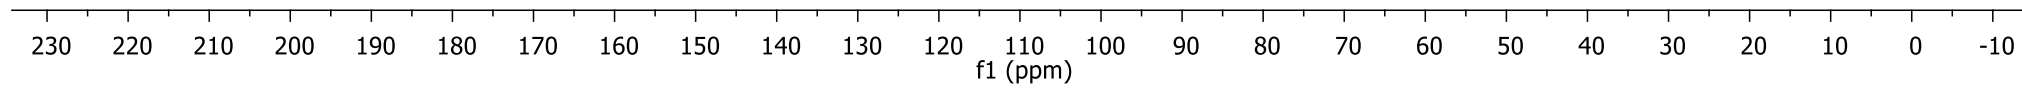

<sup>1</sup>H NMR (400 MHz, CDCl<sub>3</sub>)

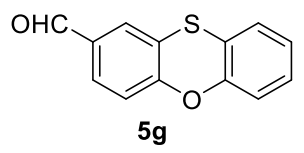

7.63  
7.63  
7.61  
7.61  
7.59  
7.58  
7.16  
7.15  
7.14  
7.14  
7.14  
7.13  
7.12  
7.12  
7.08  
7.07  
7.06  
7.05  
7.05  
7.03  
7.03  
7.01  
7.00  
7.00  
6.98

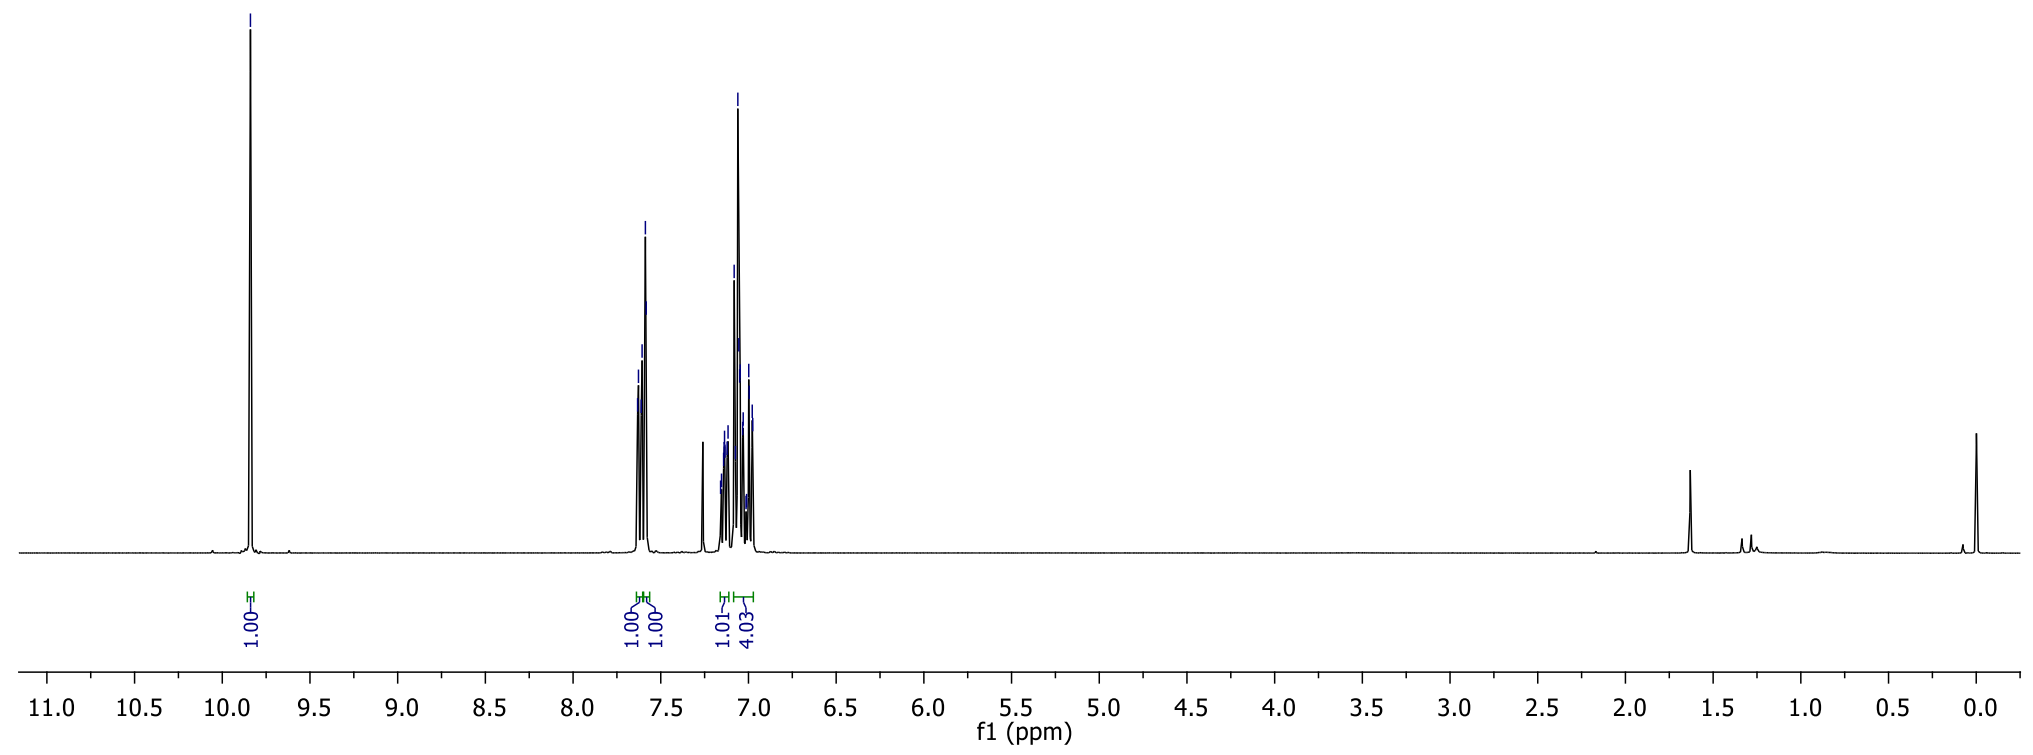

<sup>13</sup>C NMR (101 MHz, CDCl<sub>3</sub>)

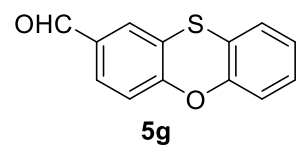

190.07

156.64

150.93

133.25  
130.15  
128.21  
128.10  
126.90  
125.41  
121.38  
118.62  
118.30  
118.03

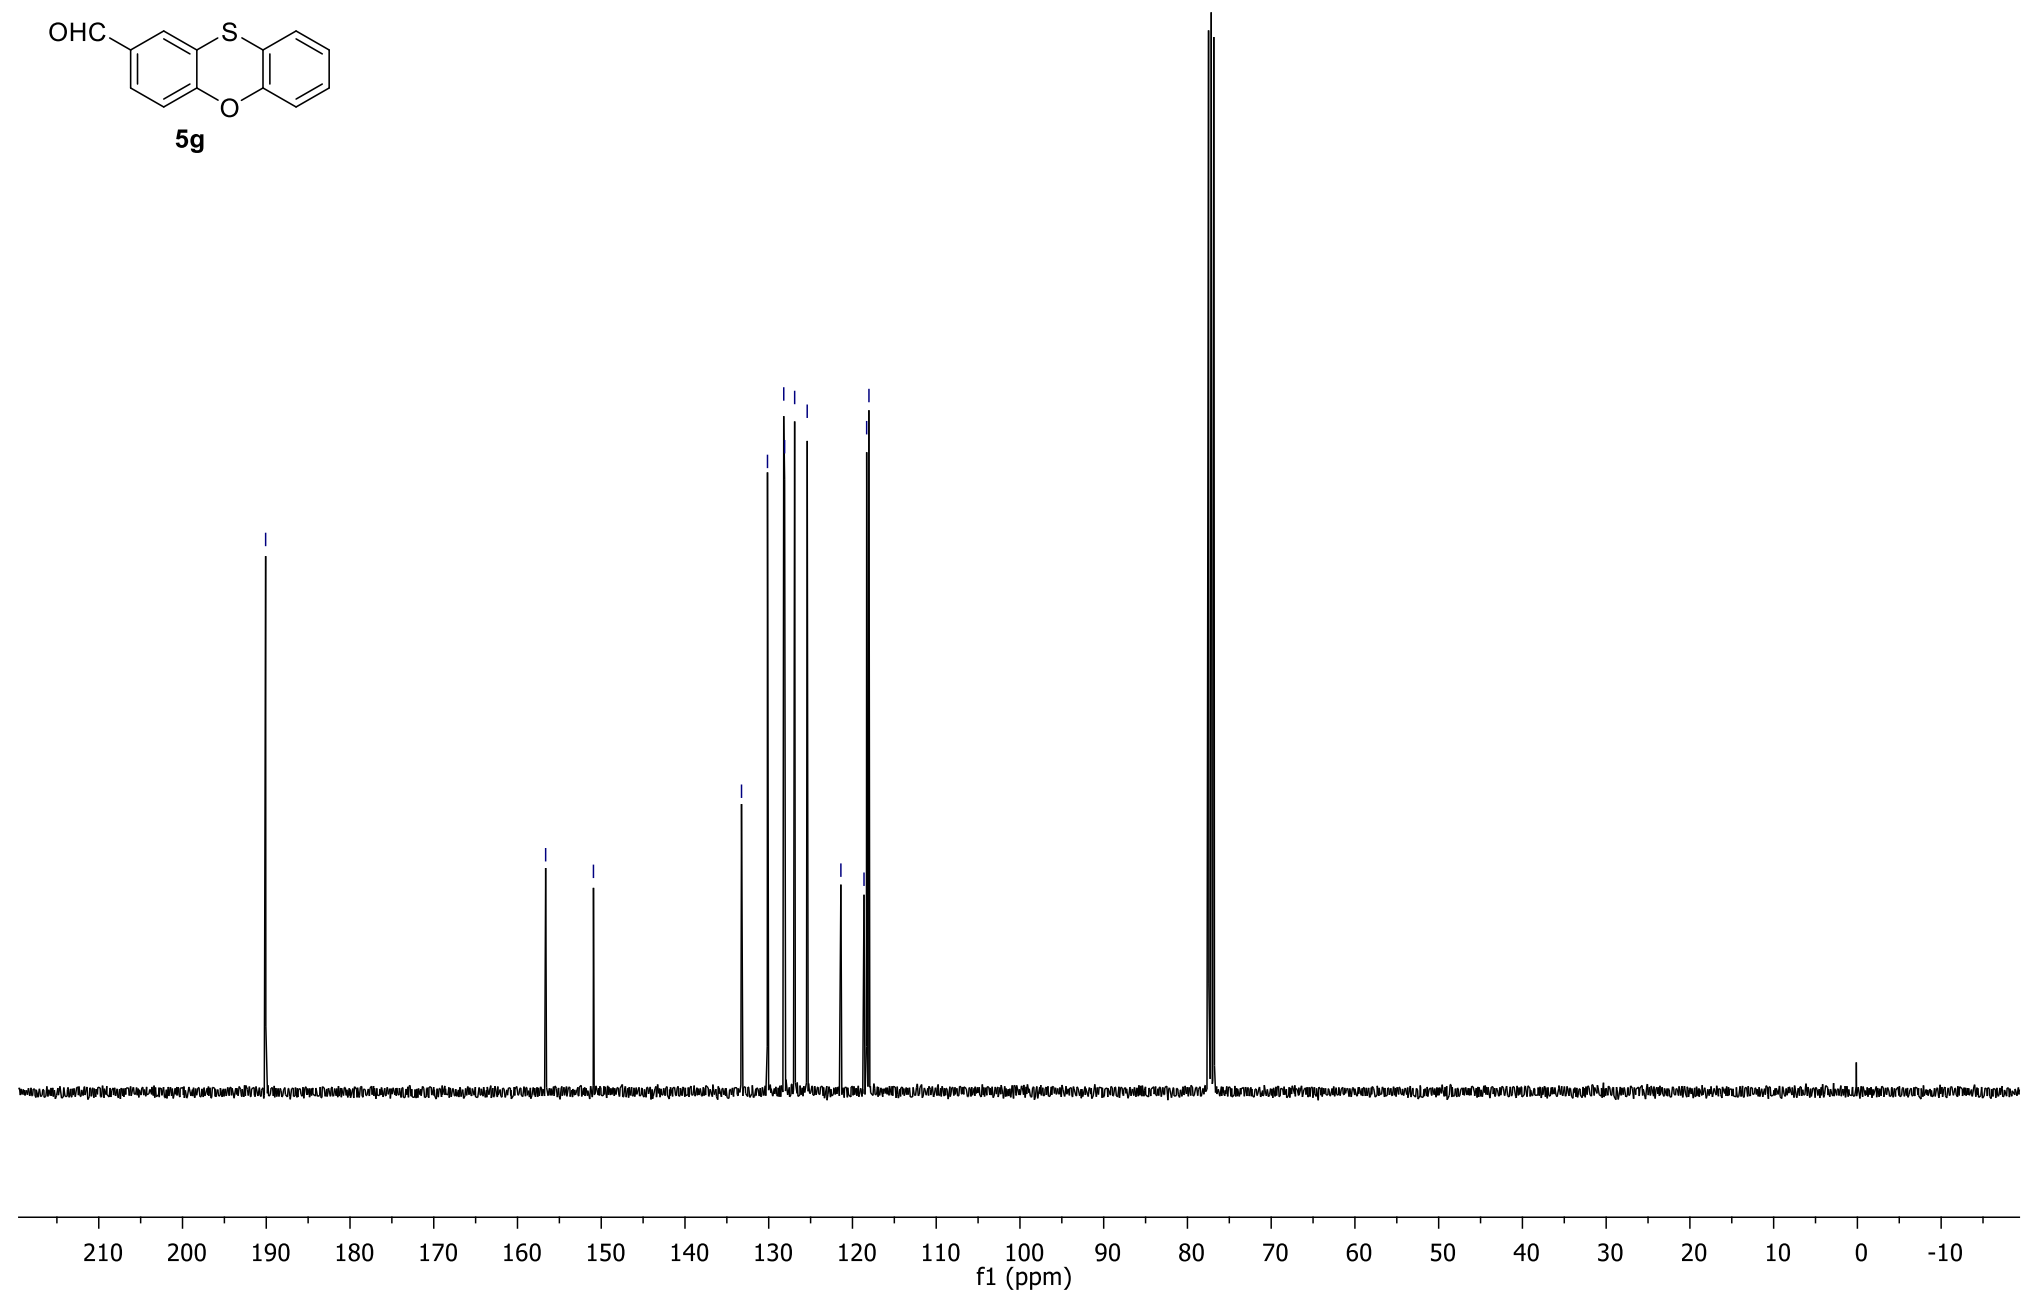

<sup>1</sup>H NMR (400 MHz, CDCl<sub>3</sub>)

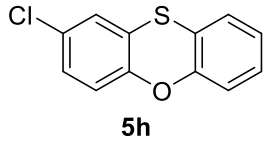

7.16  
7.15  
7.14  
7.14  
7.14  
7.13  
7.12  
7.12  
7.09  
7.09  
7.08  
7.08  
7.07  
7.07  
7.06  
7.05  
7.04  
7.03  
7.02  
7.01  
7.00  
7.00  
6.98  
6.98  
6.92  
6.91  
6.91  
6.90

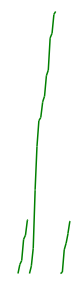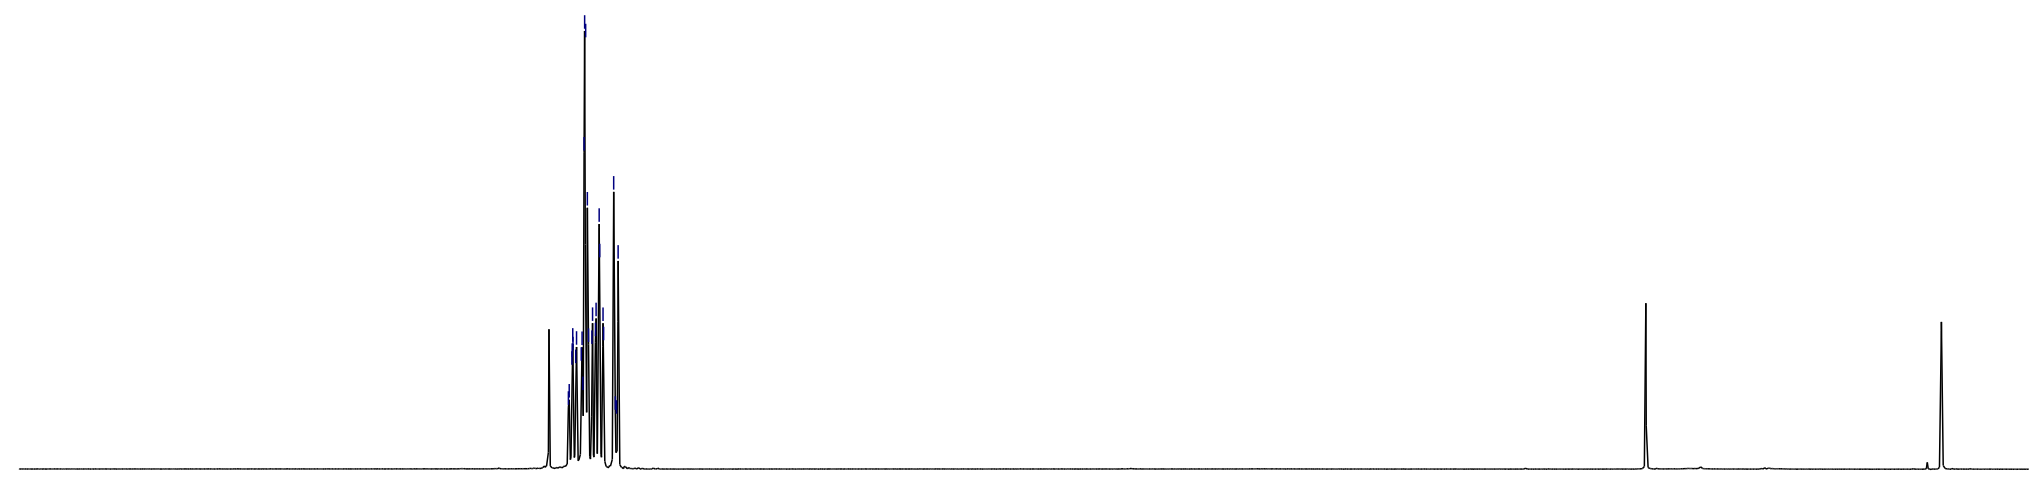

1.03  
5.00  
1.00

10.0 9.5 9.0 8.5 8.0 7.5 7.0 6.5 6.0 5.5 5.0 4.5 4.0 3.5 3.0 2.5 2.0 1.5 1.0 0.5 0.0

f1 (ppm)

$^{13}\text{C}$  NMR (101 MHz,  $\text{CDCl}_3$ )

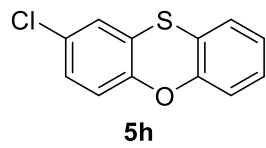

151.98  
150.89

129.52  
128.13  
127.67  
126.91  
126.38  
124.91  
122.17  
119.23  
118.83  
117.97

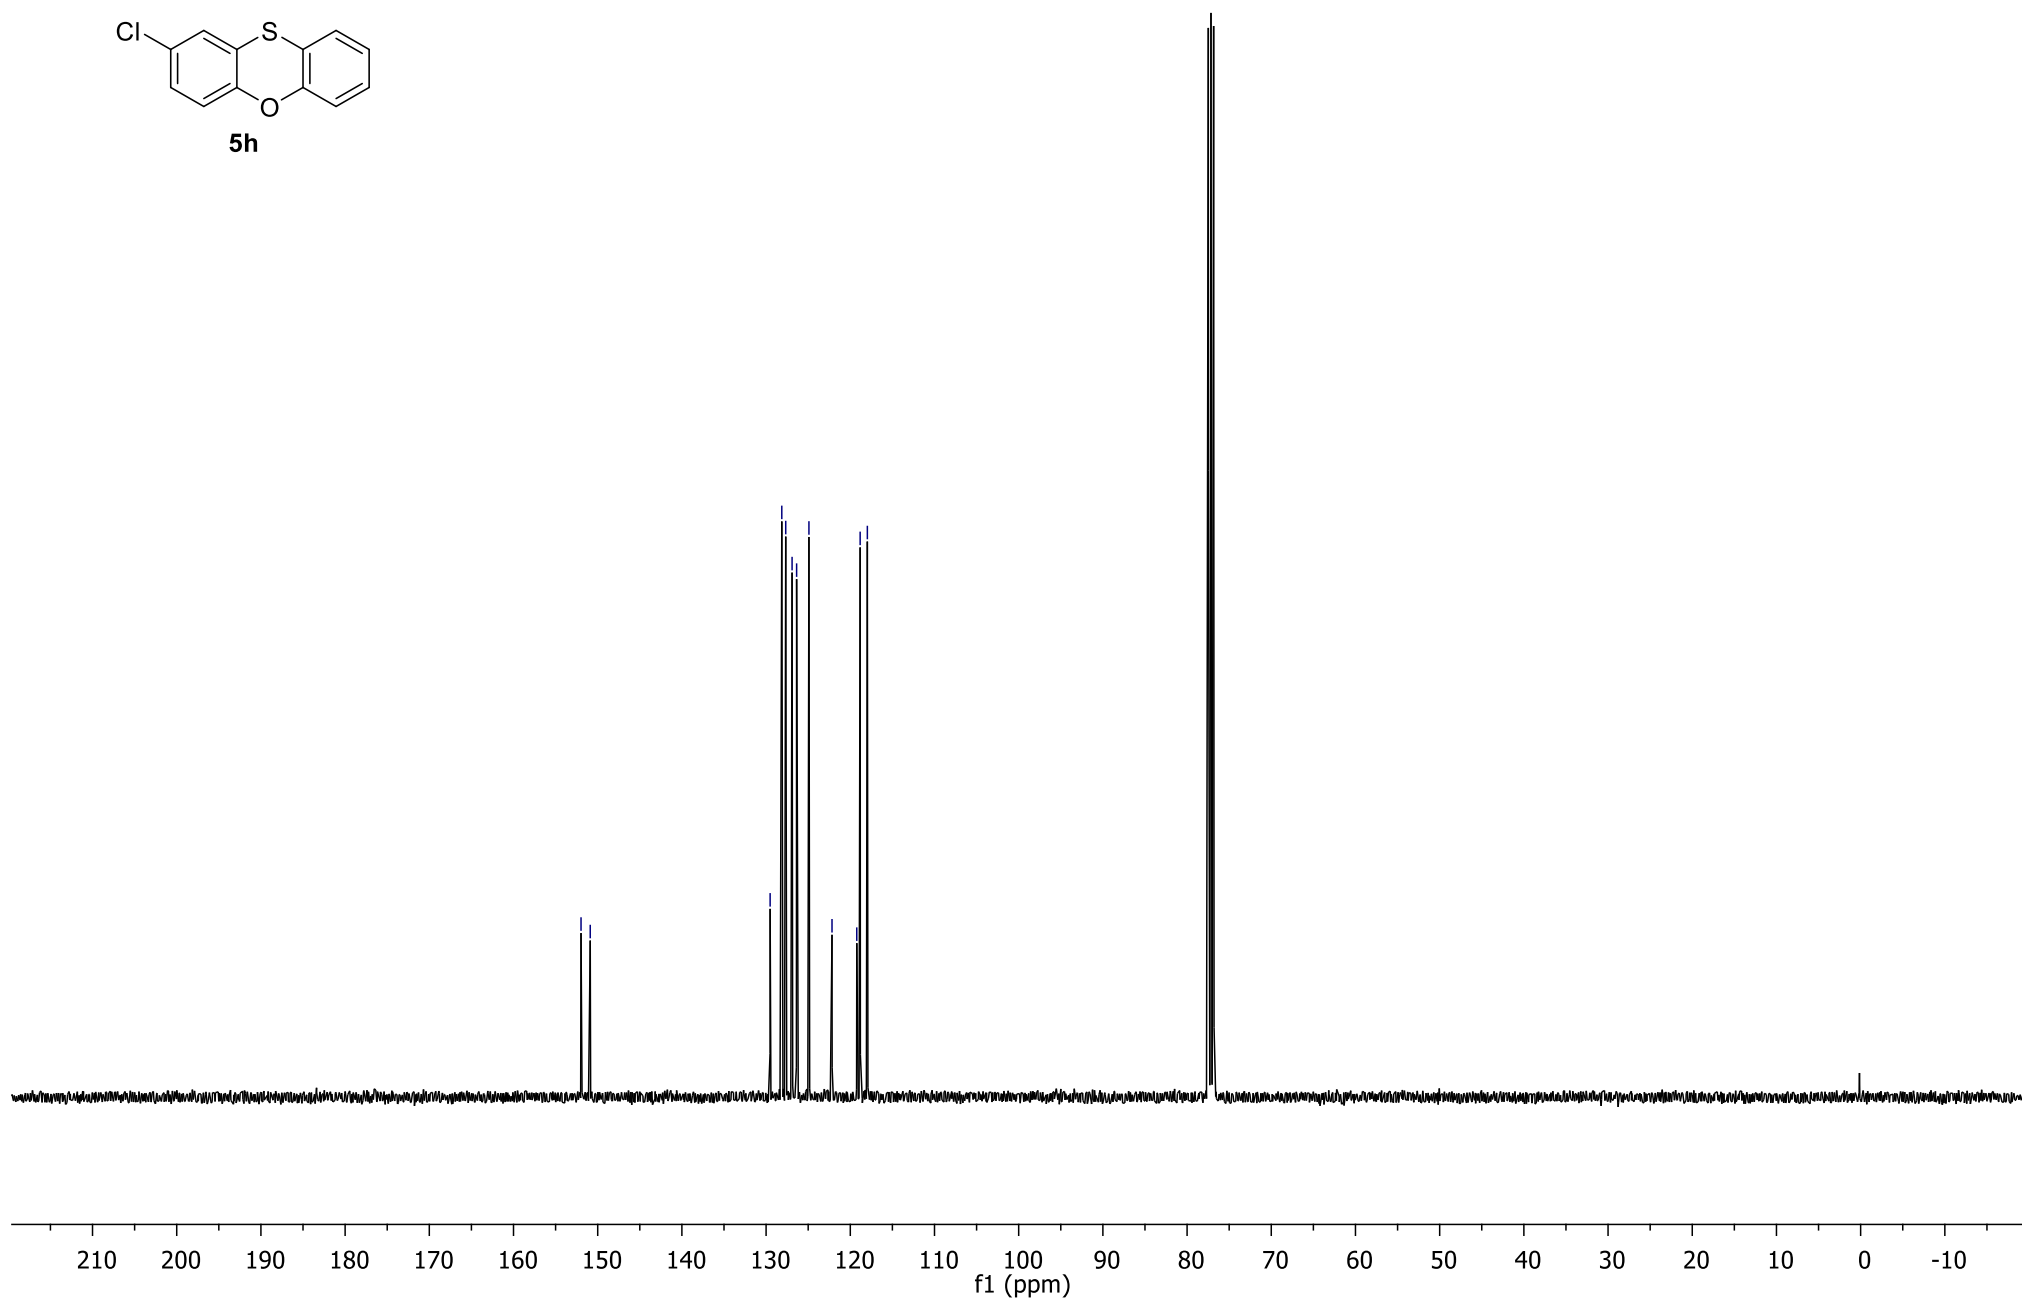

<sup>1</sup>H NMR (400 MHz, CDCl<sub>3</sub>)

7.17  
7.16  
7.15  
7.15  
7.14  
7.14  
7.13  
7.13  
7.11  
7.10  
7.09  
7.08  
7.04  
7.04  
7.02  
7.02  
7.01  
7.01  
7.00  
7.00  
6.99  
6.99  
6.97  
6.97  
6.96  
6.95  
6.95  
6.95  
6.94  
6.93  
6.85  
6.84  
6.84  
6.84  
6.83  
6.83  
6.82  
6.82  
6.81  
6.80  
6.79

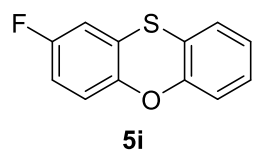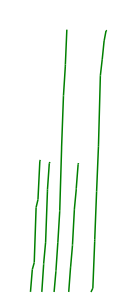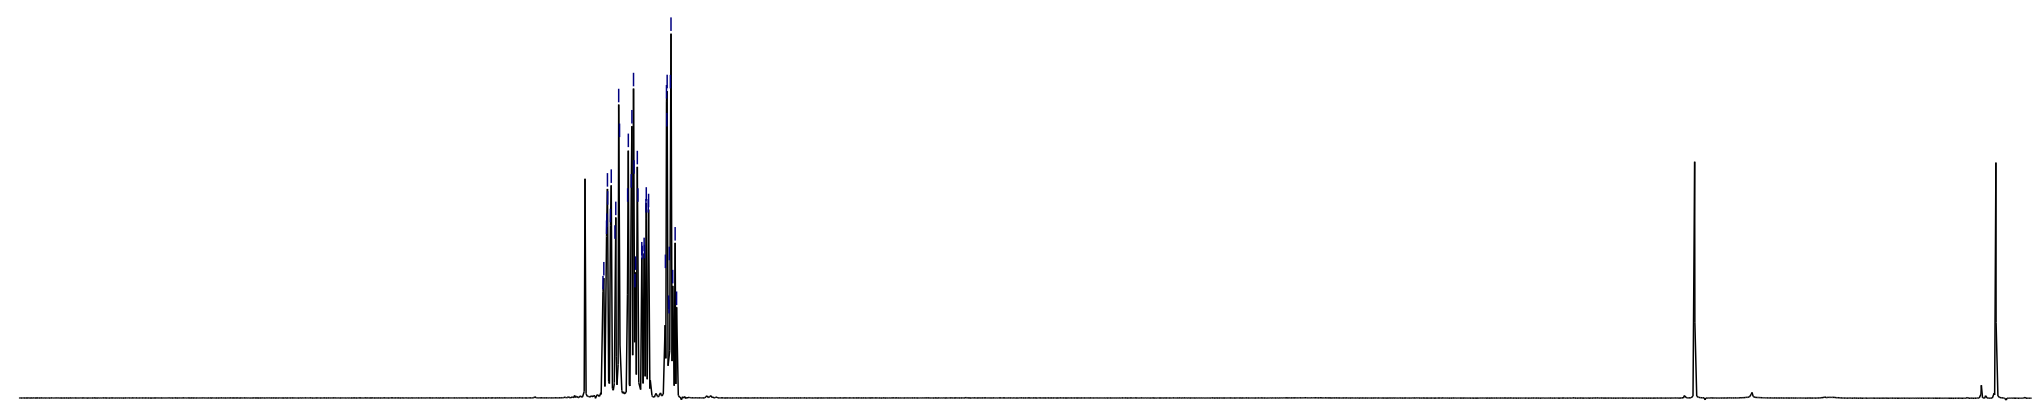

1.01  
0.99  
2.00  
0.98  
1.99

10.0 9.5 9.0 8.5 8.0 7.5 7.0 6.5 6.0 5.5 5.0 4.5 4.0 3.5 3.0 2.5 2.0 1.5 1.0 0.5 0.0

f1 (ppm)

<sup>13</sup>C NMR (101 MHz, CDCl<sub>3</sub>)

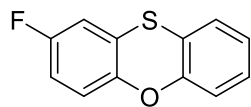

**5i**

160.47  
158.04  
152.27  
148.42  
148.40  
128.14  
126.85  
124.80  
122.12  
122.03  
119.31  
118.70  
118.61  
117.96  
114.37  
114.13  
113.66  
113.40

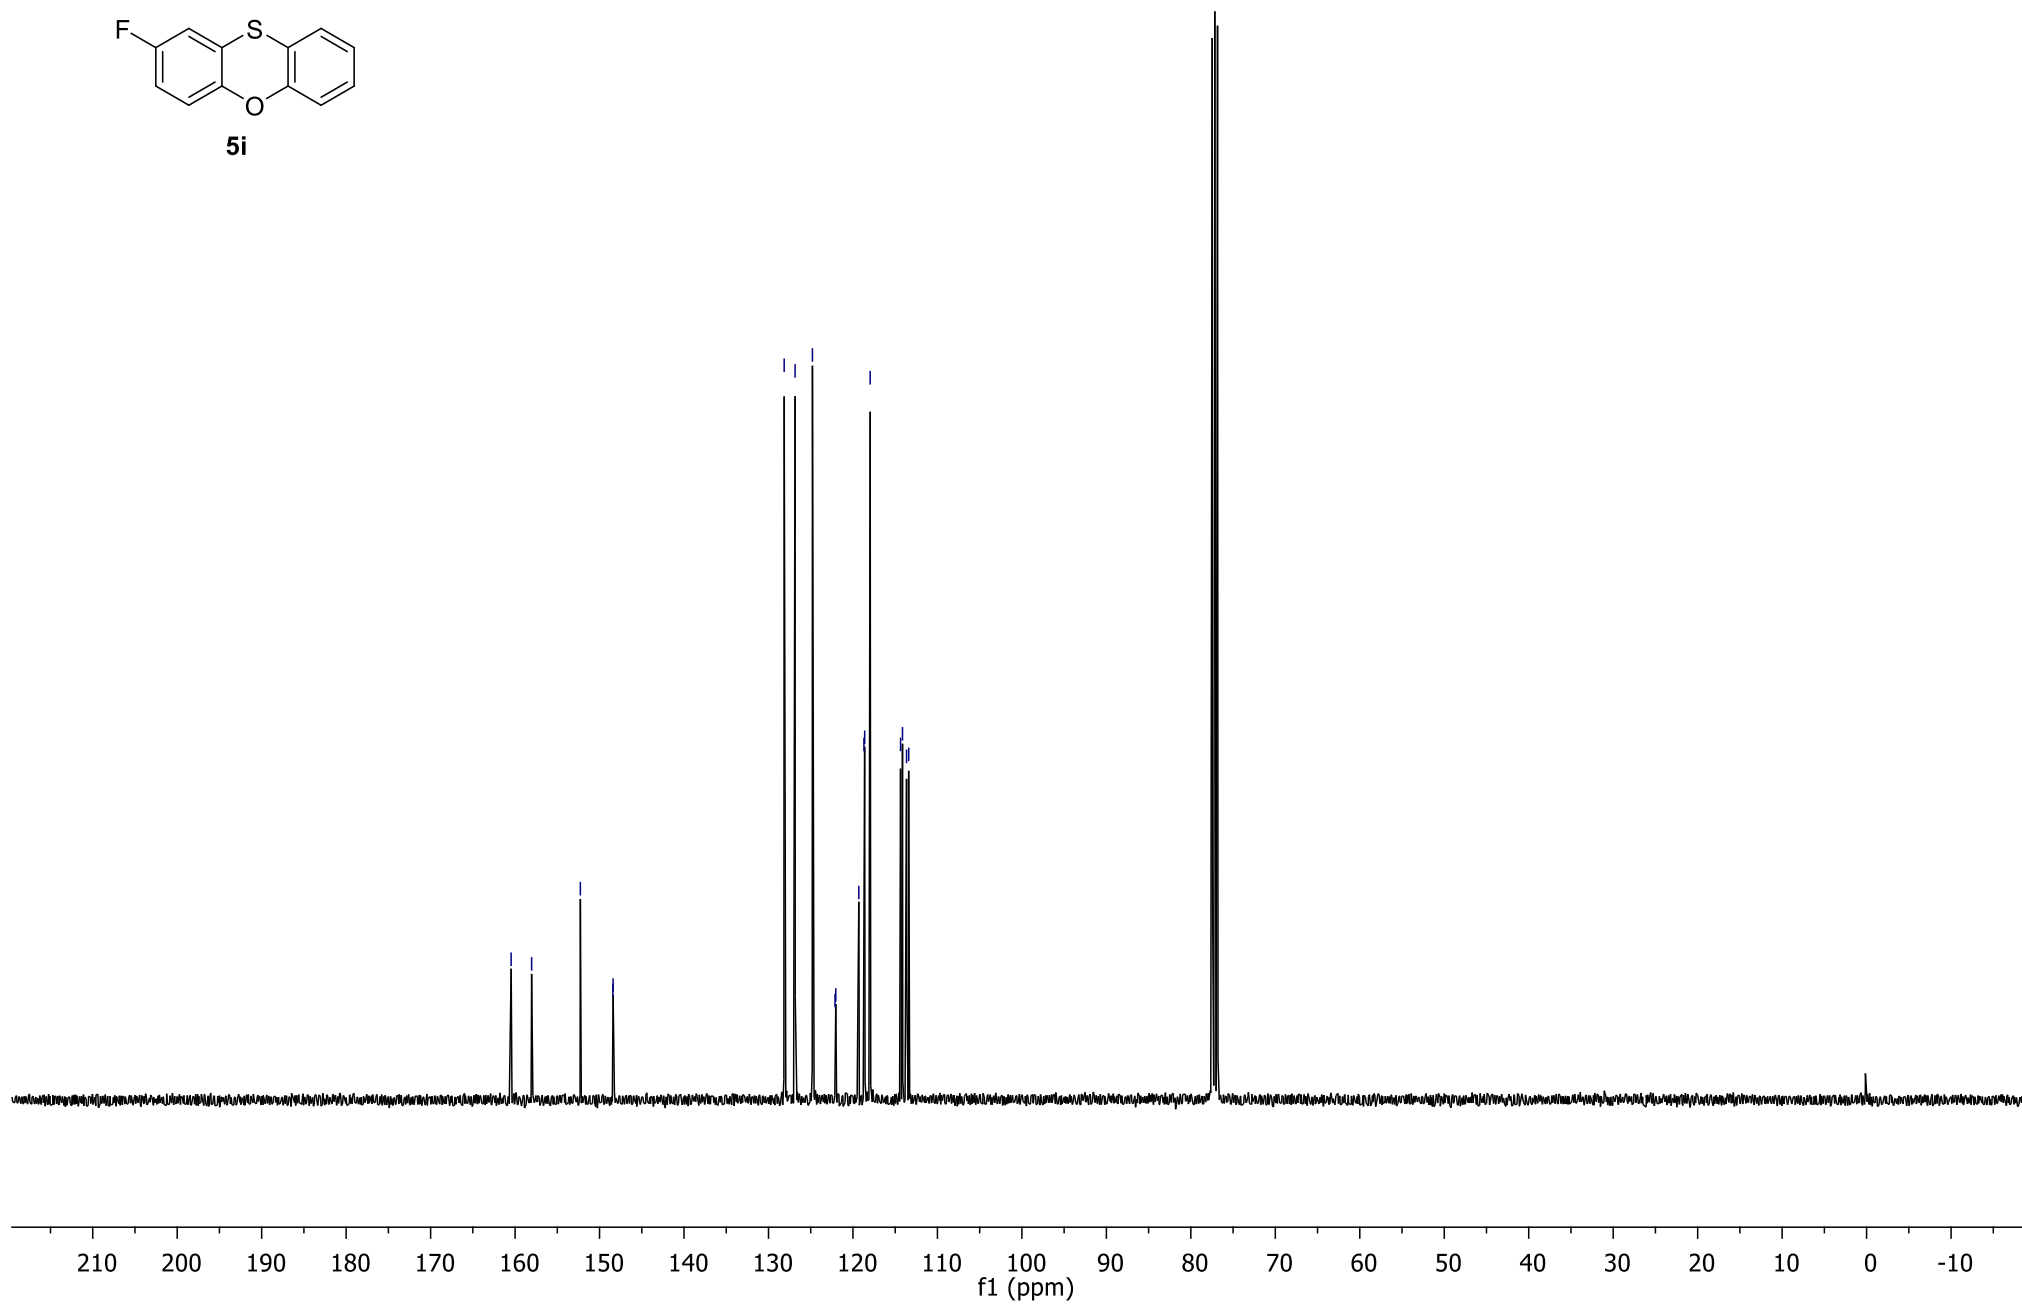

<sup>1</sup>H NMR (400 MHz, CDCl<sub>3</sub>)

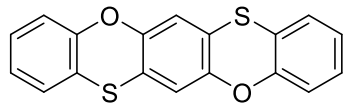

5j

7.15  
7.15  
7.13  
7.13  
7.13  
7.11  
7.11  
7.09  
7.07  
7.07  
7.03  
7.02  
7.01  
7.01  
6.99  
6.99  
6.98  
6.98  
6.96  
6.96  
6.77

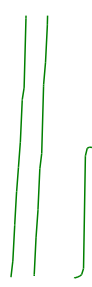

4.02  
4.02  
2.00

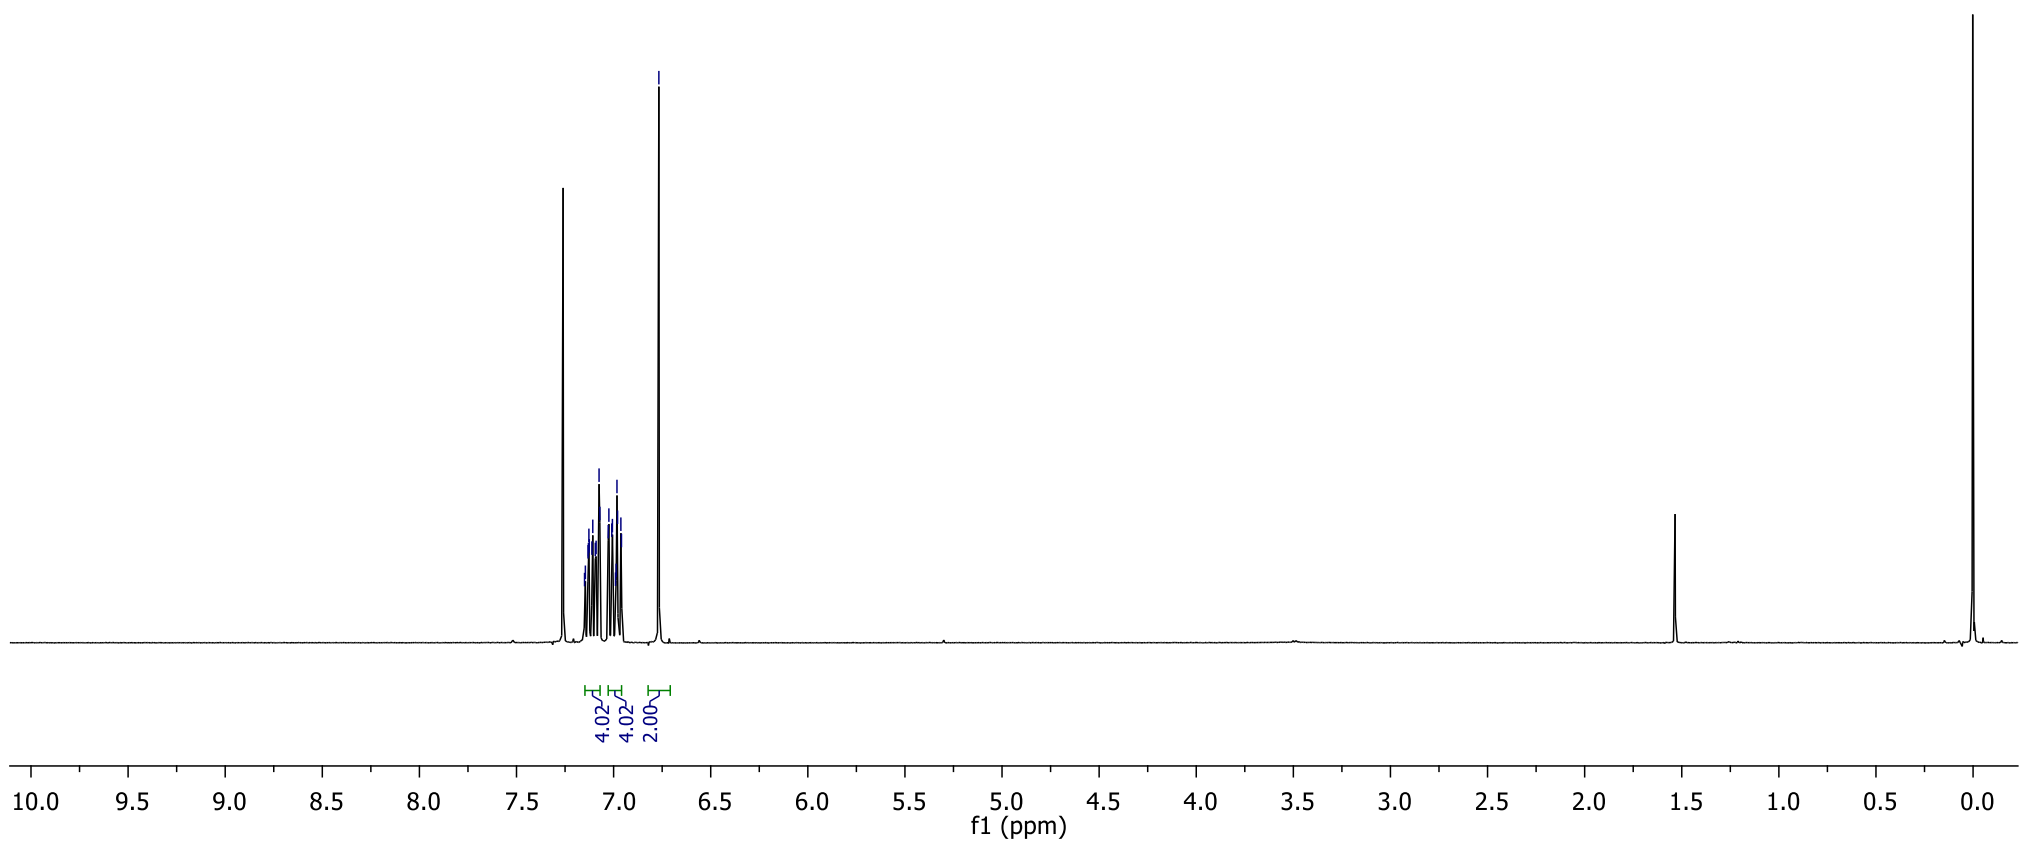



$^{13}\text{C}$  NMR (101 MHz,  $\text{CDCl}_3$ )

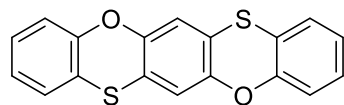

**5j**

— 152.09  
— 148.71

— 128.05  
— 126.90  
— 124.78  
— 119.47  
— 119.34  
— 117.96  
— 115.49

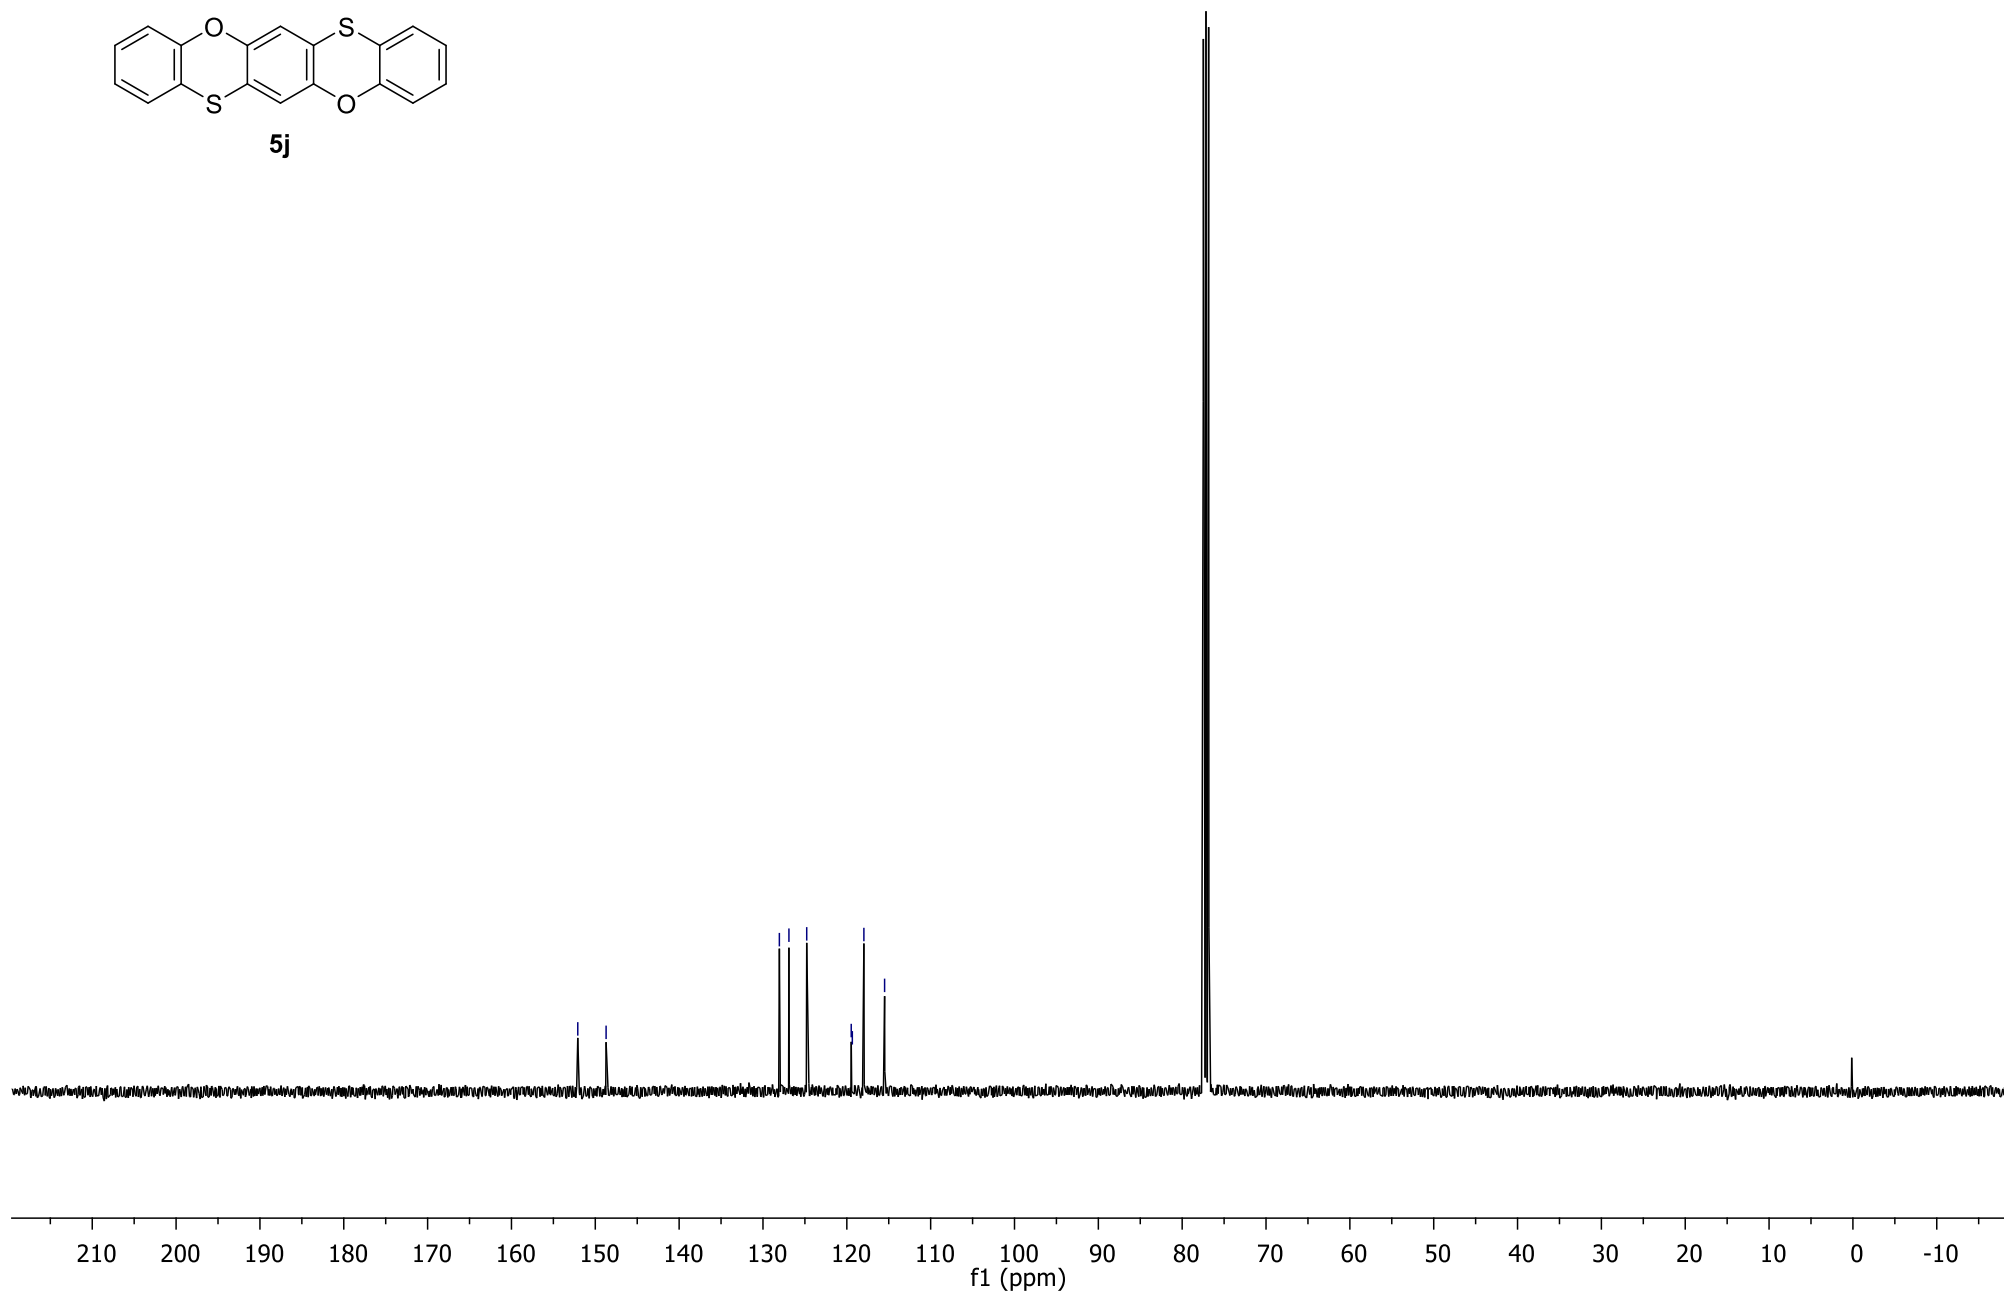

<sup>1</sup>H NMR (400 MHz, CDCl<sub>3</sub>)

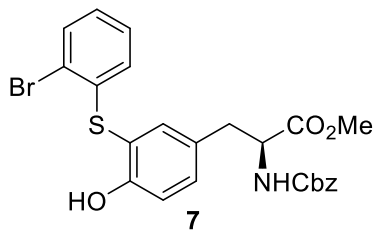

7.53  
7.51  
7.37  
7.35  
7.34  
7.32  
7.31  
7.31  
7.16  
7.14  
7.14  
7.10  
7.08  
7.07  
7.01  
6.99  
6.96  
6.54  
6.52  
6.36  
5.30  
5.28  
5.11  
5.09  
5.08  
5.05  
4.65  
4.64  
4.62  
4.61  
3.67  
3.13  
3.12  
3.10  
3.09  
3.03  
3.02  
3.01  
3.00

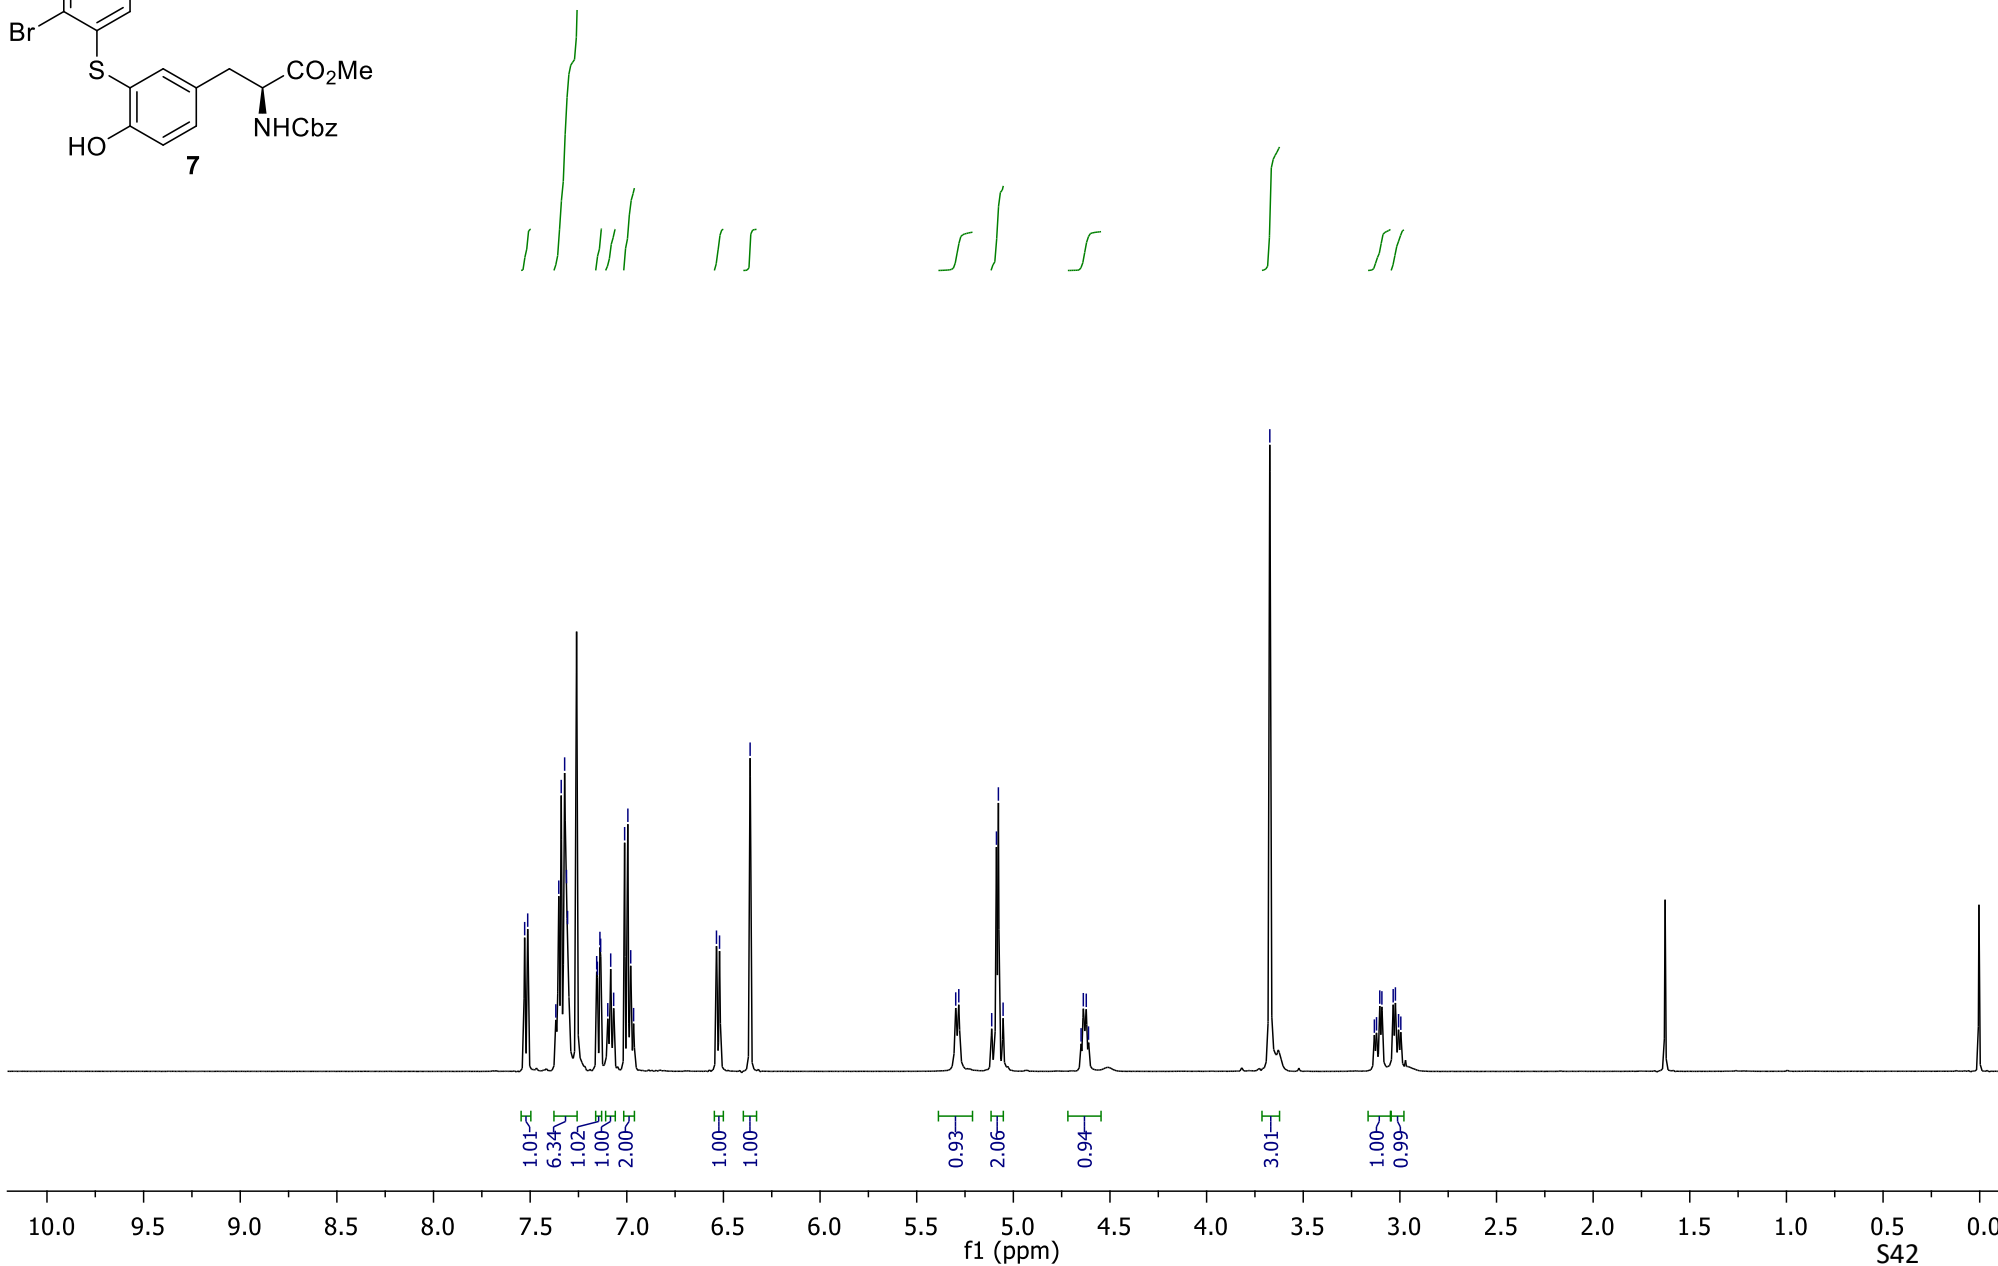

<sup>13</sup>C NMR (101 MHz, CDCl<sub>3</sub>)

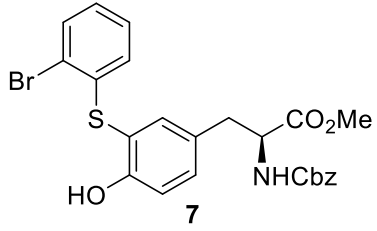

— 171.84

— 156.77  
— 155.64

— 137.89  
— 137.25  
— 136.27  
— 133.93  
— 133.07  
— 129.16  
— 128.68  
— 128.37  
— 128.24  
— 128.21  
— 127.14  
— 126.84  
— 121.13  
— 116.19  
— 115.40

— 67.16

— 55.00  
— 52.56

— 37.40

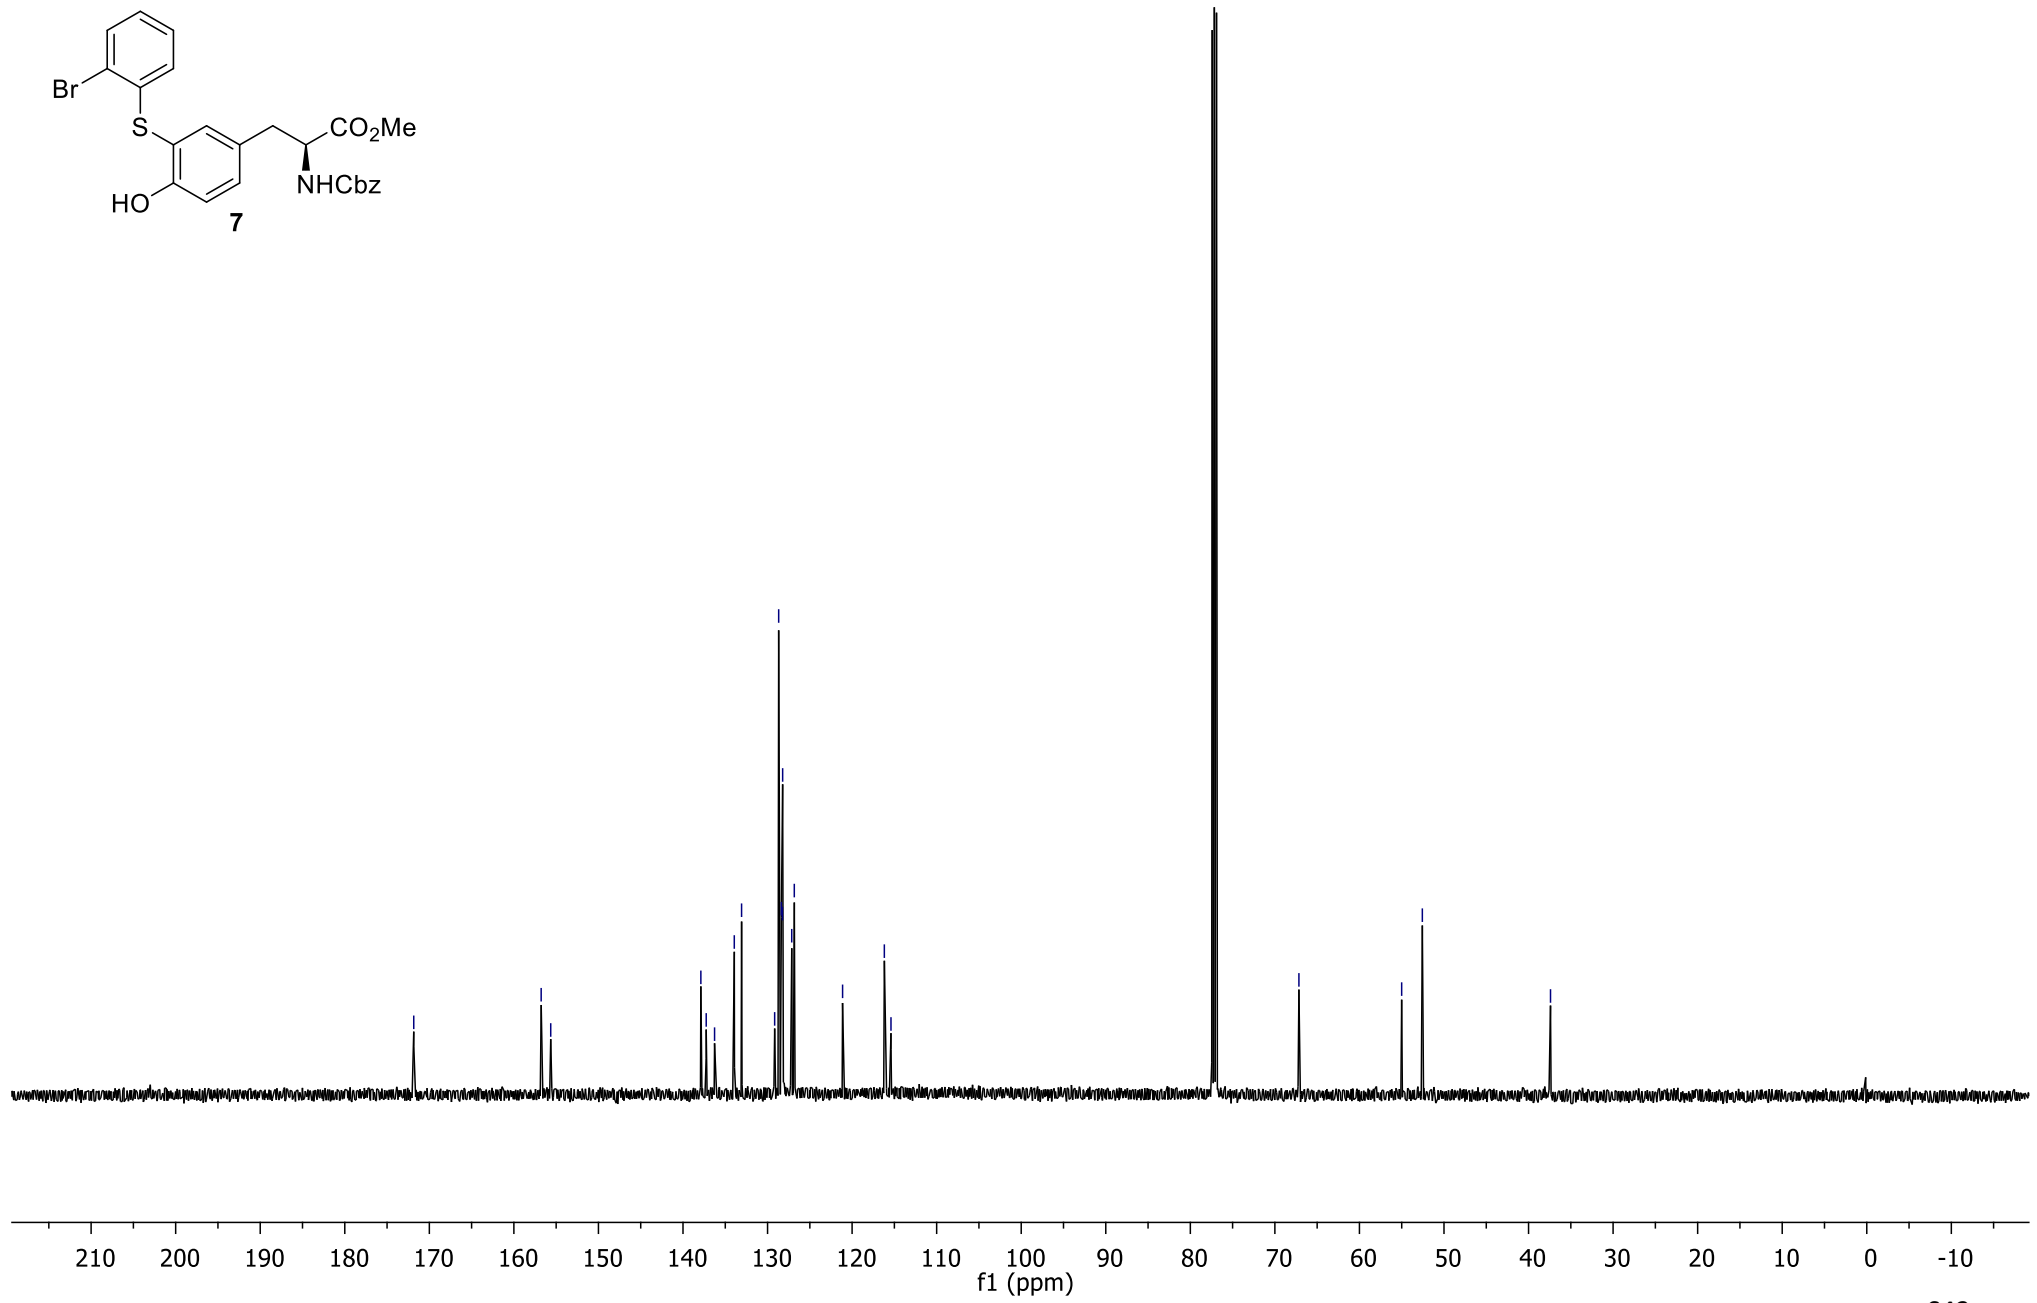

<sup>1</sup>H NMR (400 MHz, CDCl<sub>3</sub>)

7.36, 7.35, 7.33, 7.33, 7.32, 7.31, 7.30, 7.14, 7.14, 7.13, 7.12, 7.12, 7.11, 7.10, 7.09, 7.08, 7.07, 7.07, 7.02, 7.02, 7.00, 7.00, 6.99, 6.99, 6.98, 6.98, 6.97, 6.97, 6.90, 6.89, 6.89, 6.88, 6.88, 6.84, 6.83, 6.82, 6.82, 5.24, 5.22, 5.14, 5.11, 5.10, 5.07, 5.07, 4.64, 4.63, 4.61, 4.59, 3.73, 3.08, 3.07, 3.05, 3.03, 3.00, 2.99, 2.97, 2.95

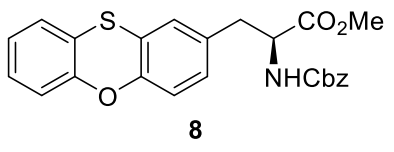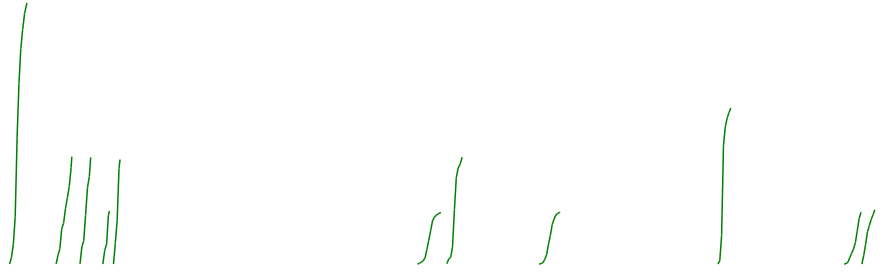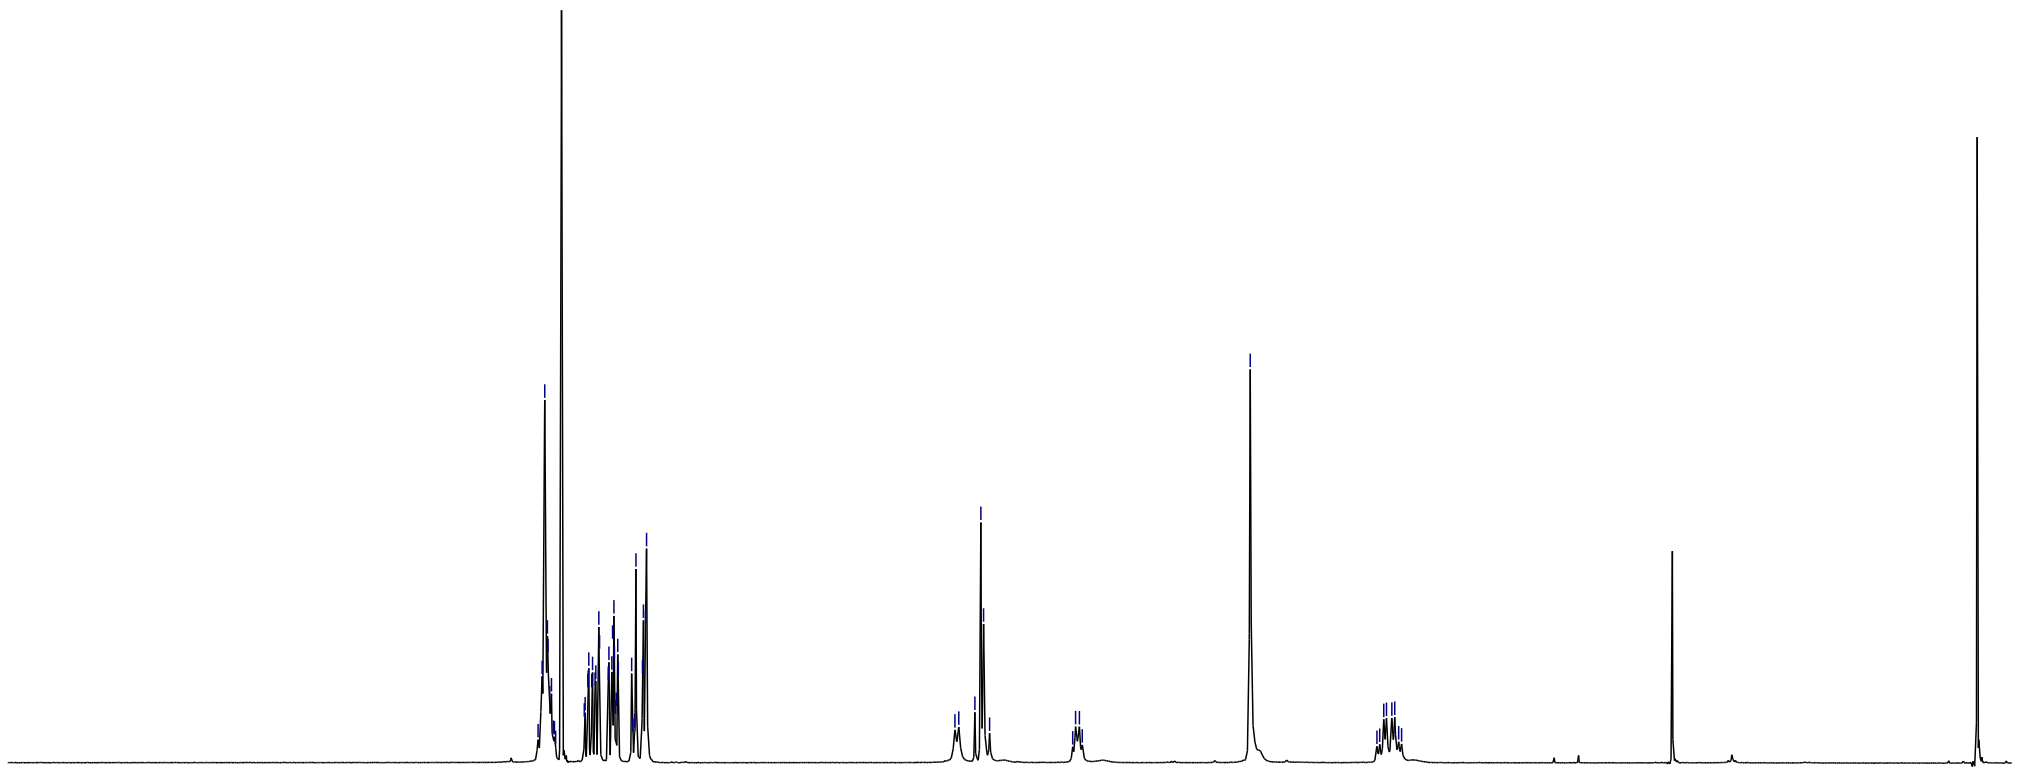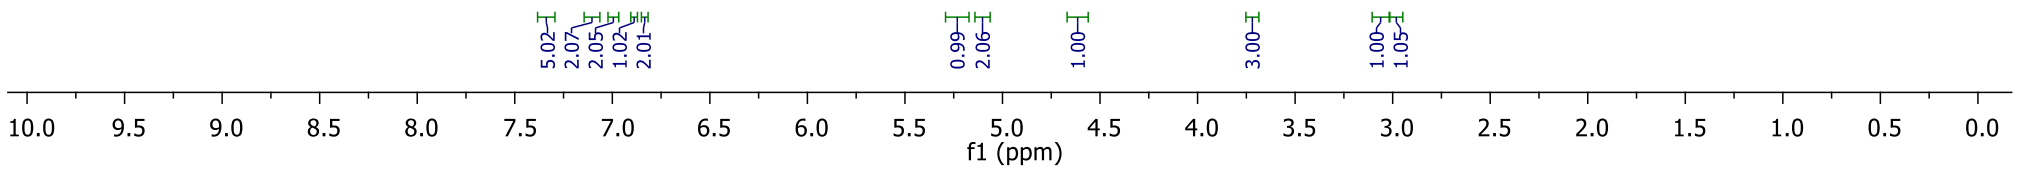

<sup>13</sup>C NMR (101 MHz, CDCl<sub>3</sub>)

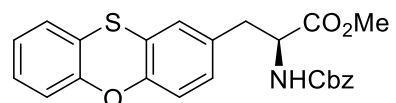

8

171.87

155.72

152.18

151.38

136.34

132.29

128.70

128.65

128.36

128.23

127.90

127.49

126.92

124.67

120.48

119.91

117.95

117.92

67.20

54.88

52.56

37.53

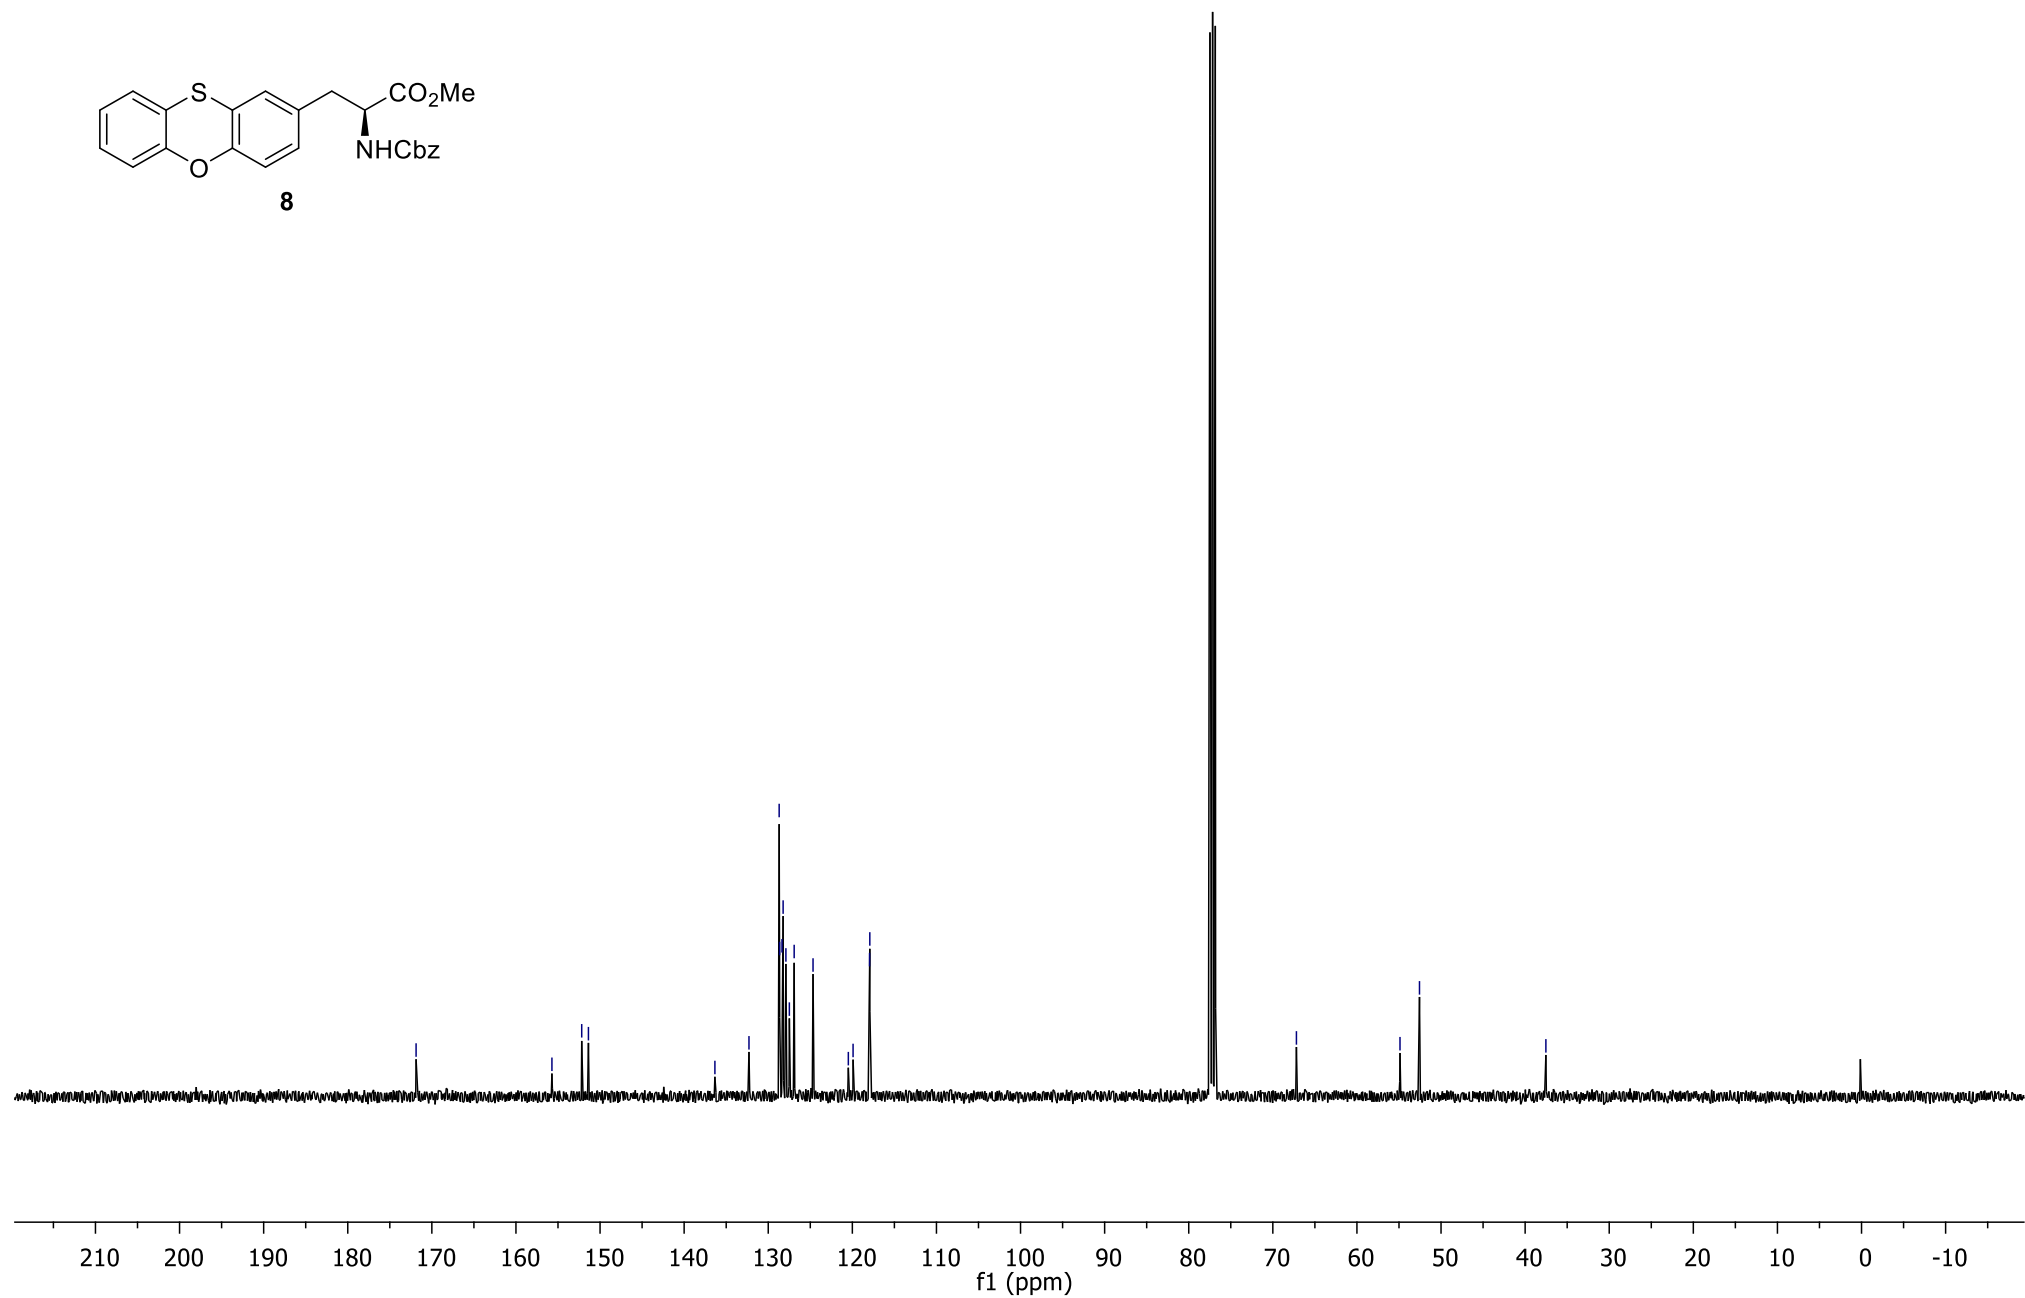



<sup>13</sup>C NMR (101 MHz, CD<sub>3</sub>OD)

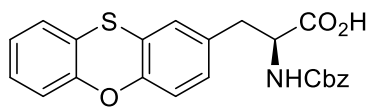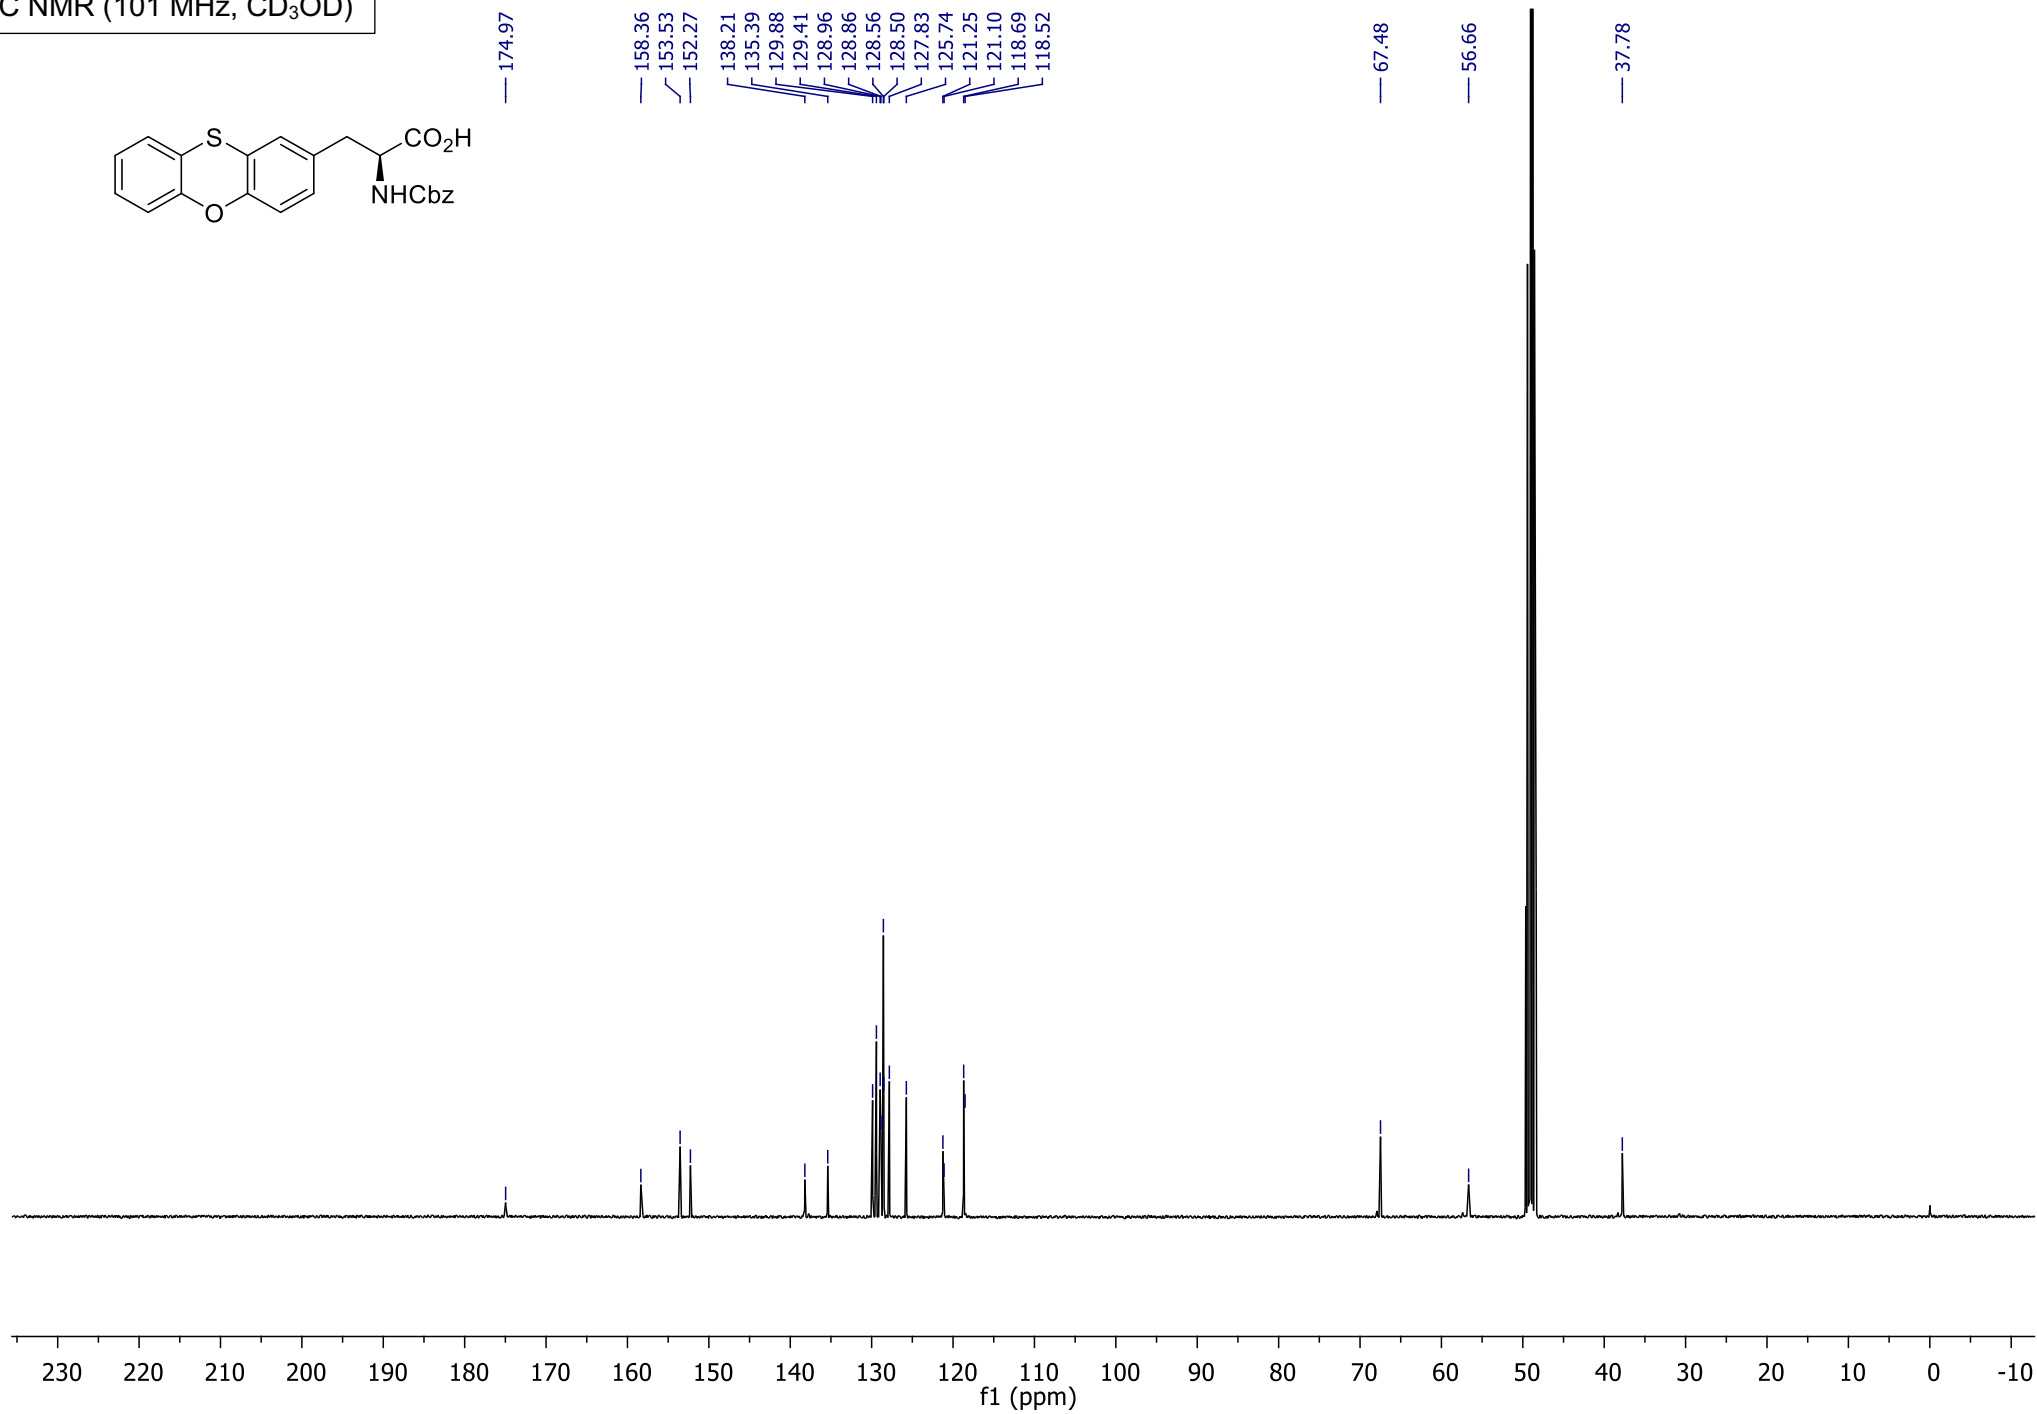

<sup>1</sup>H NMR (400 MHz, CD<sub>3</sub>OD)

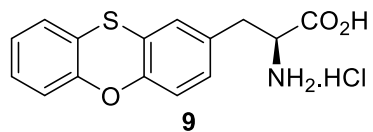

7.19  
7.19  
7.17  
7.17  
7.16  
7.15  
7.14  
7.14  
7.12  
7.12  
7.10  
7.07  
7.07  
7.05  
7.03  
7.02  
7.00

4.88

4.23  
4.22  
4.22  
4.20

3.27  
3.26  
3.23  
3.22  
3.12  
3.10  
3.08  
3.06

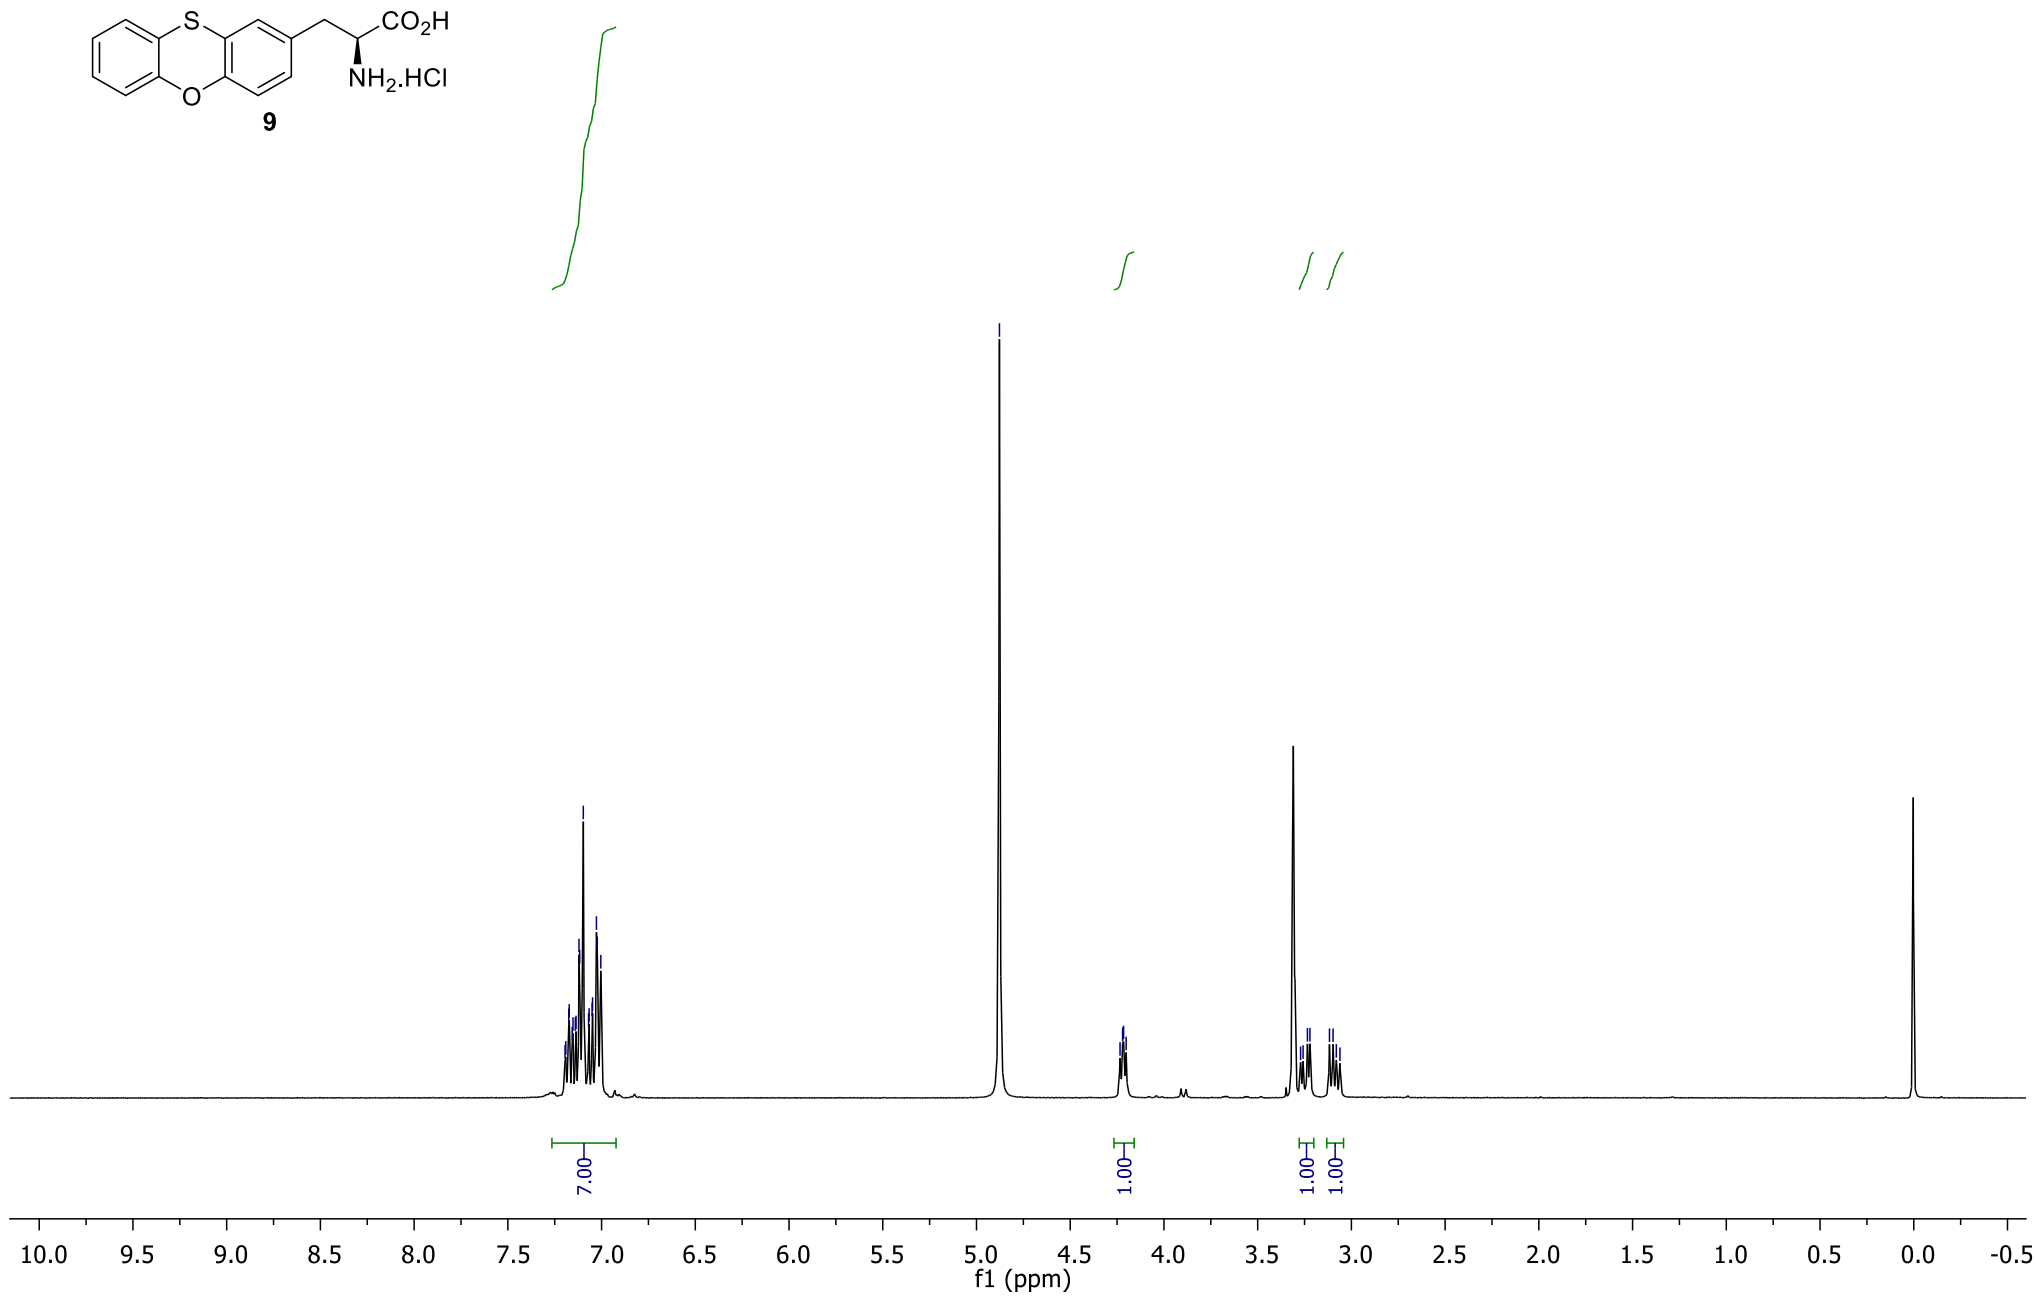



$^{13}\text{C}$  NMR (101 MHz,  $\text{CD}_3\text{OD}$ )

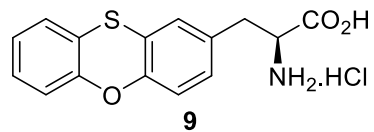

171.17

153.36  
153.15

132.32  
130.12  
129.17  
128.75  
127.85  
125.97  
122.19  
120.86  
119.17  
118.74

55.03

36.40

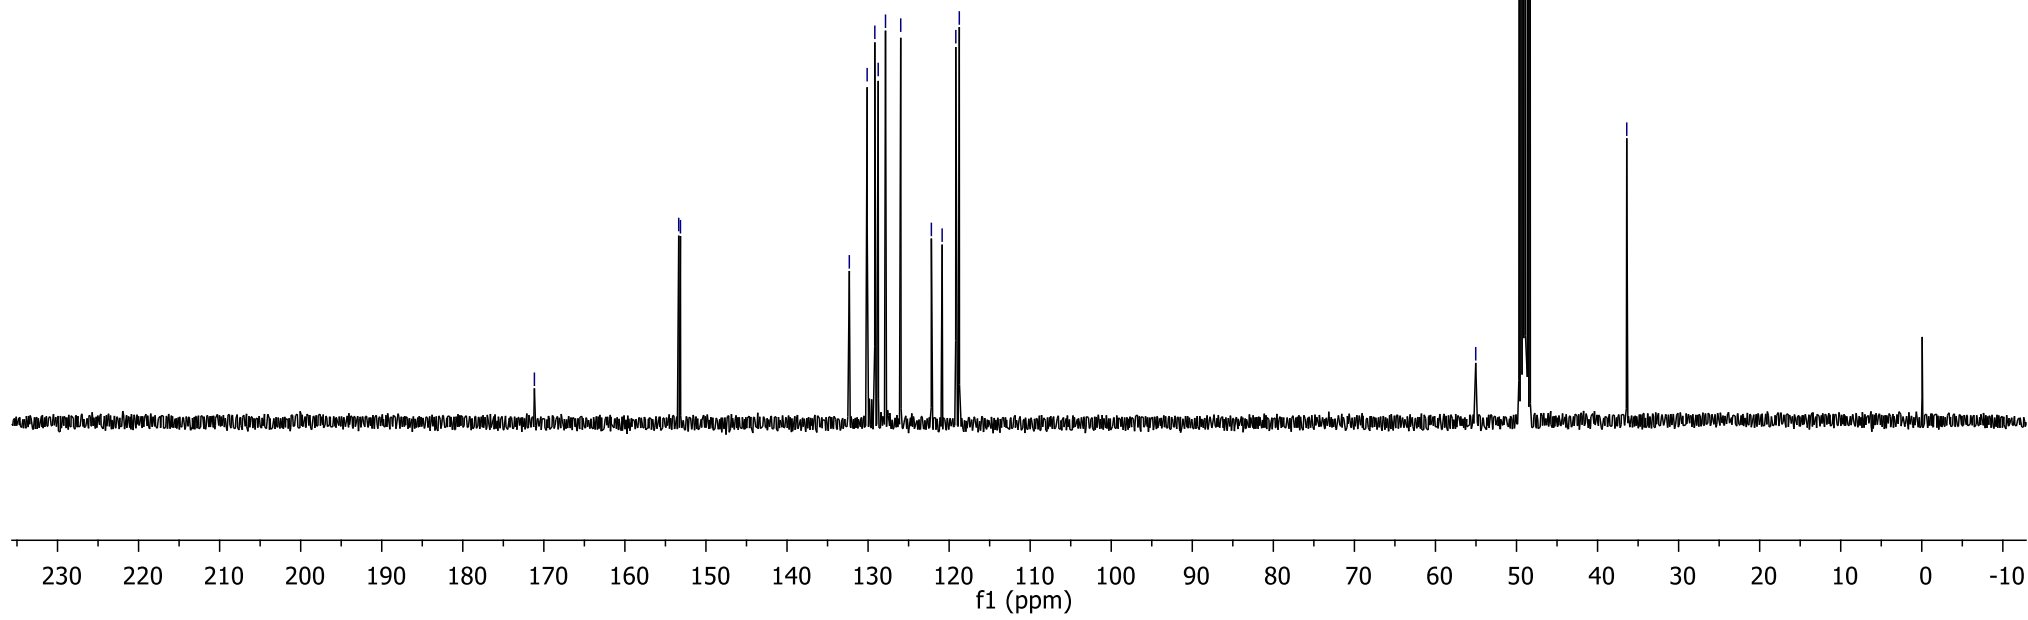

<sup>1</sup>H NMR (400 MHz, CDCl<sub>3</sub>)

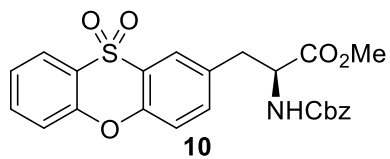

8.05  
8.04  
8.03  
7.79  
7.79  
7.65  
7.65  
7.64  
7.62  
7.62  
7.41  
7.39  
7.38  
7.36  
7.34  
7.34  
7.31  
7.31  
7.30  
7.29  
7.27

5.43  
5.42

5.10

4.69  
4.68  
4.67  
4.66

3.75

3.28

3.27

3.25

3.24

3.17

3.16

3.14

3.13

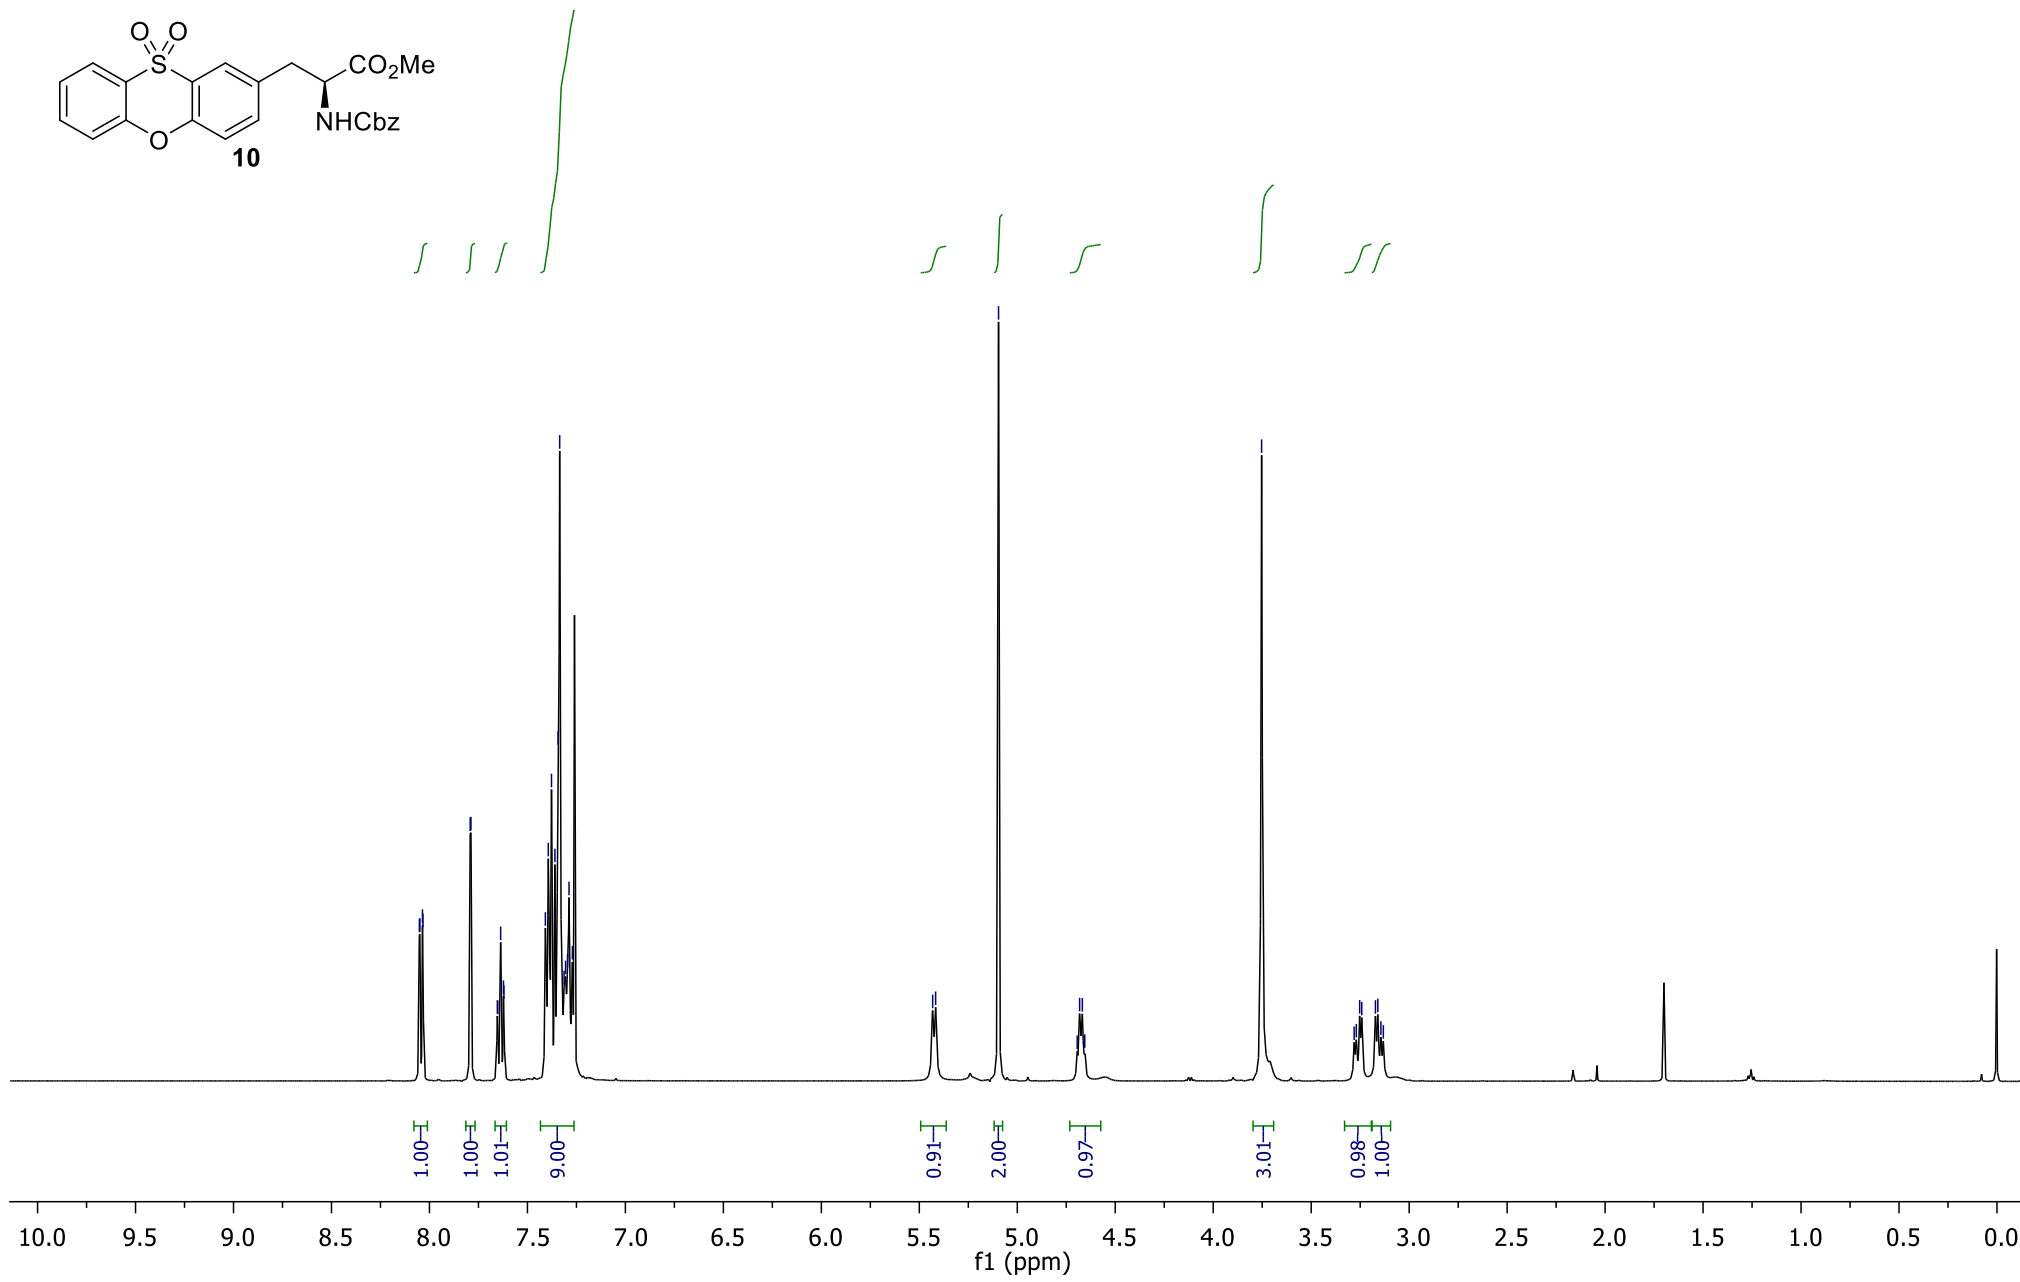

<sup>13</sup>C NMR (101 MHz, CDCl<sub>3</sub>)

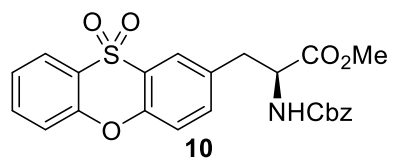

171.44

155.67

151.57

150.64

136.20

135.20

134.26

133.40

128.64

128.32

128.24

124.98

124.93

124.92

123.76

123.49

119.23

118.98

67.24

54.81

52.81

37.67

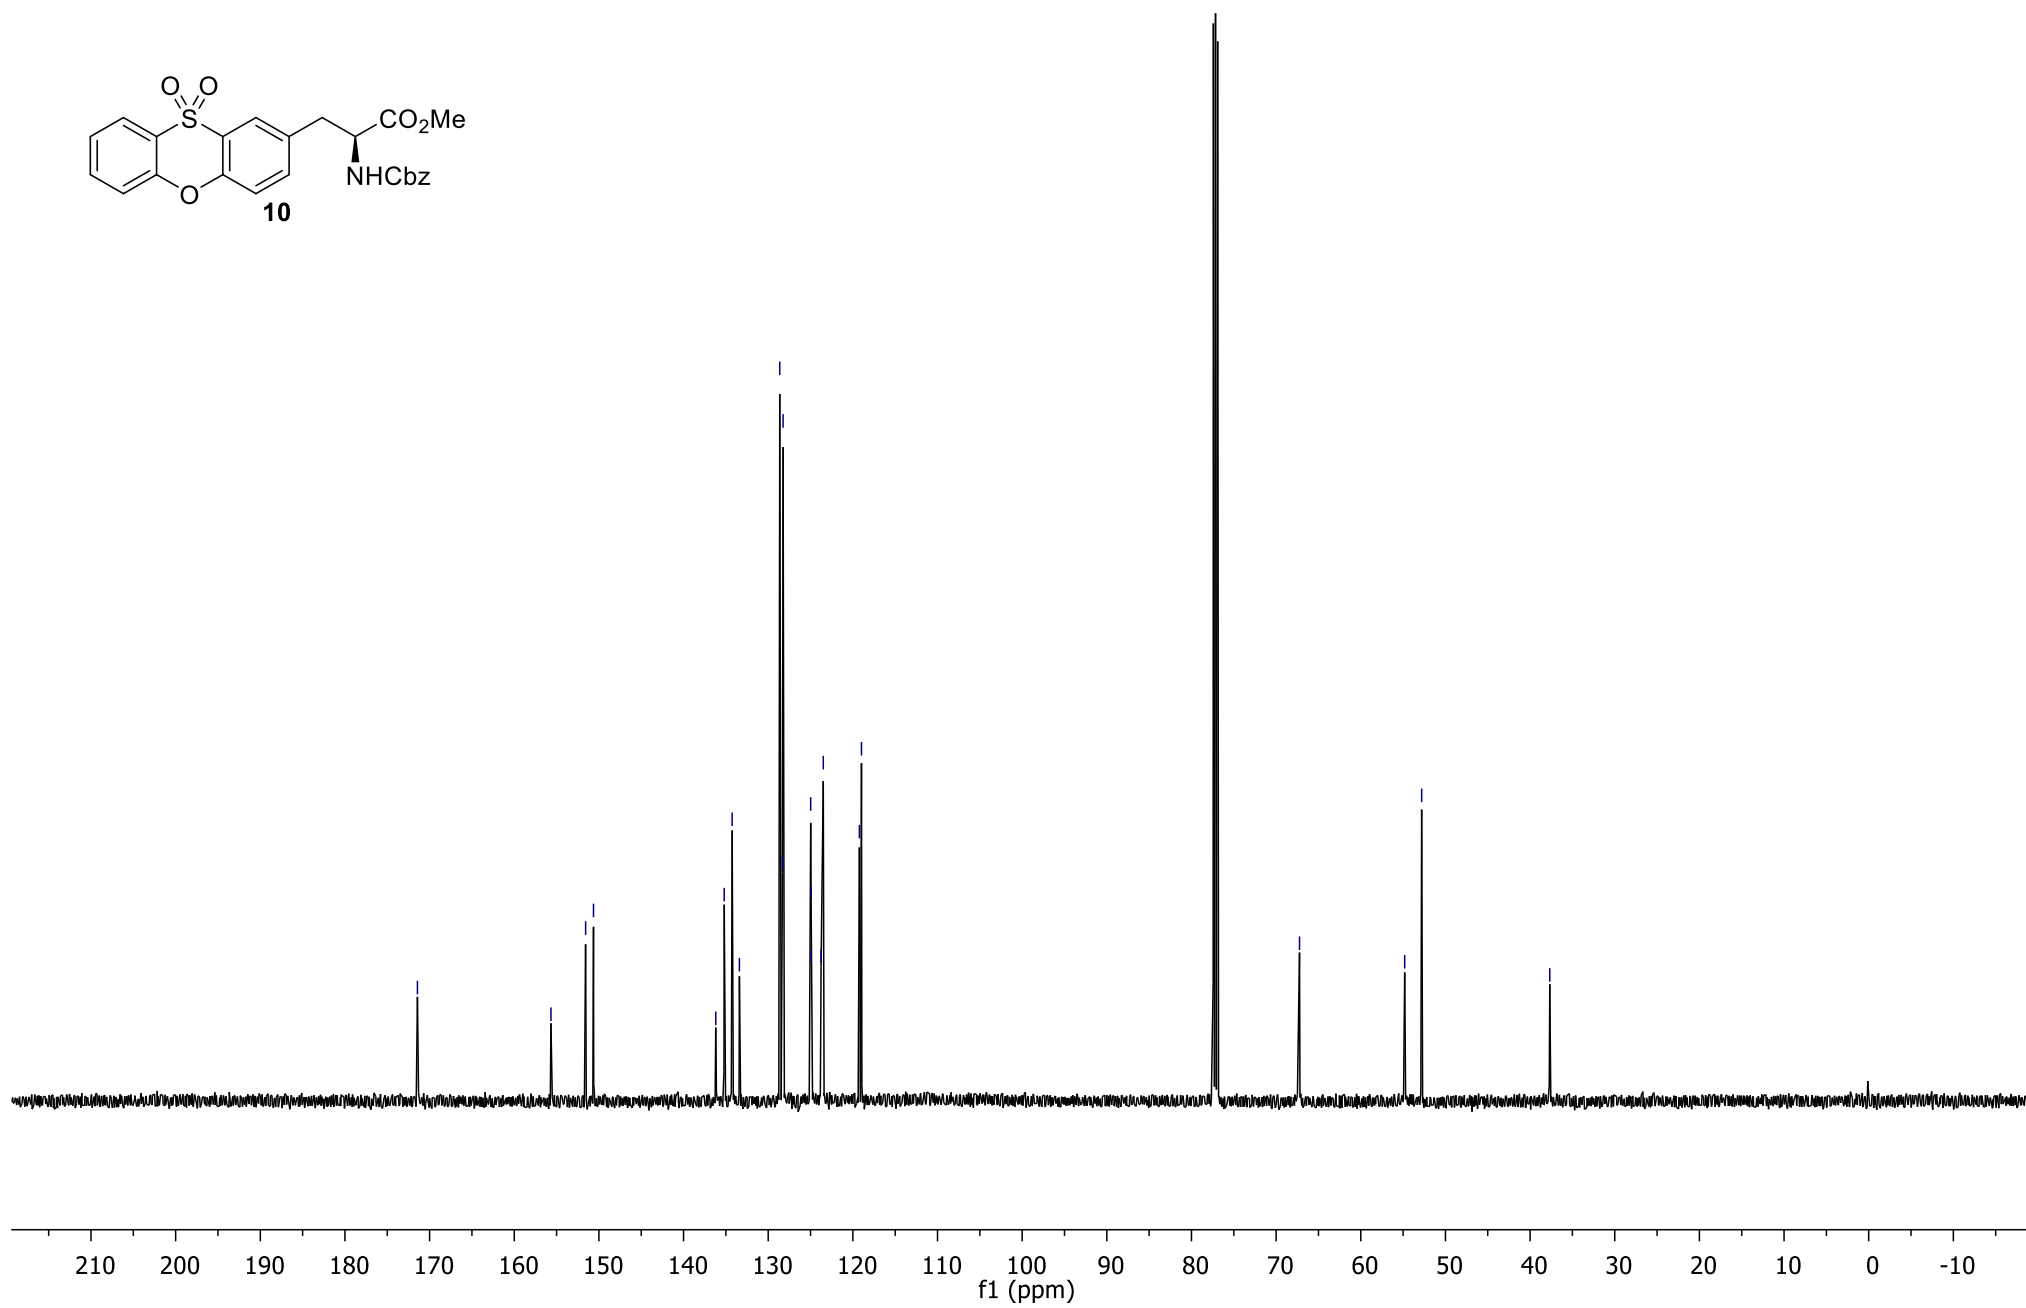

<sup>1</sup>H NMR (500 MHz, CD<sub>3</sub>OD)

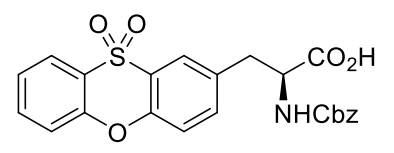

8.01  
8.00  
7.89  
7.74  
7.72  
7.71  
7.60  
7.58  
7.47  
7.46  
7.46  
7.45  
7.35  
7.34  
7.24  
7.24  
7.24  
7.22  
7.20  
7.20  
7.19

5.03  
5.01  
4.98  
4.95  
4.49  
4.48  
4.47  
4.47

3.35  
3.35  
3.33  
3.07  
3.05  
3.04  
3.02

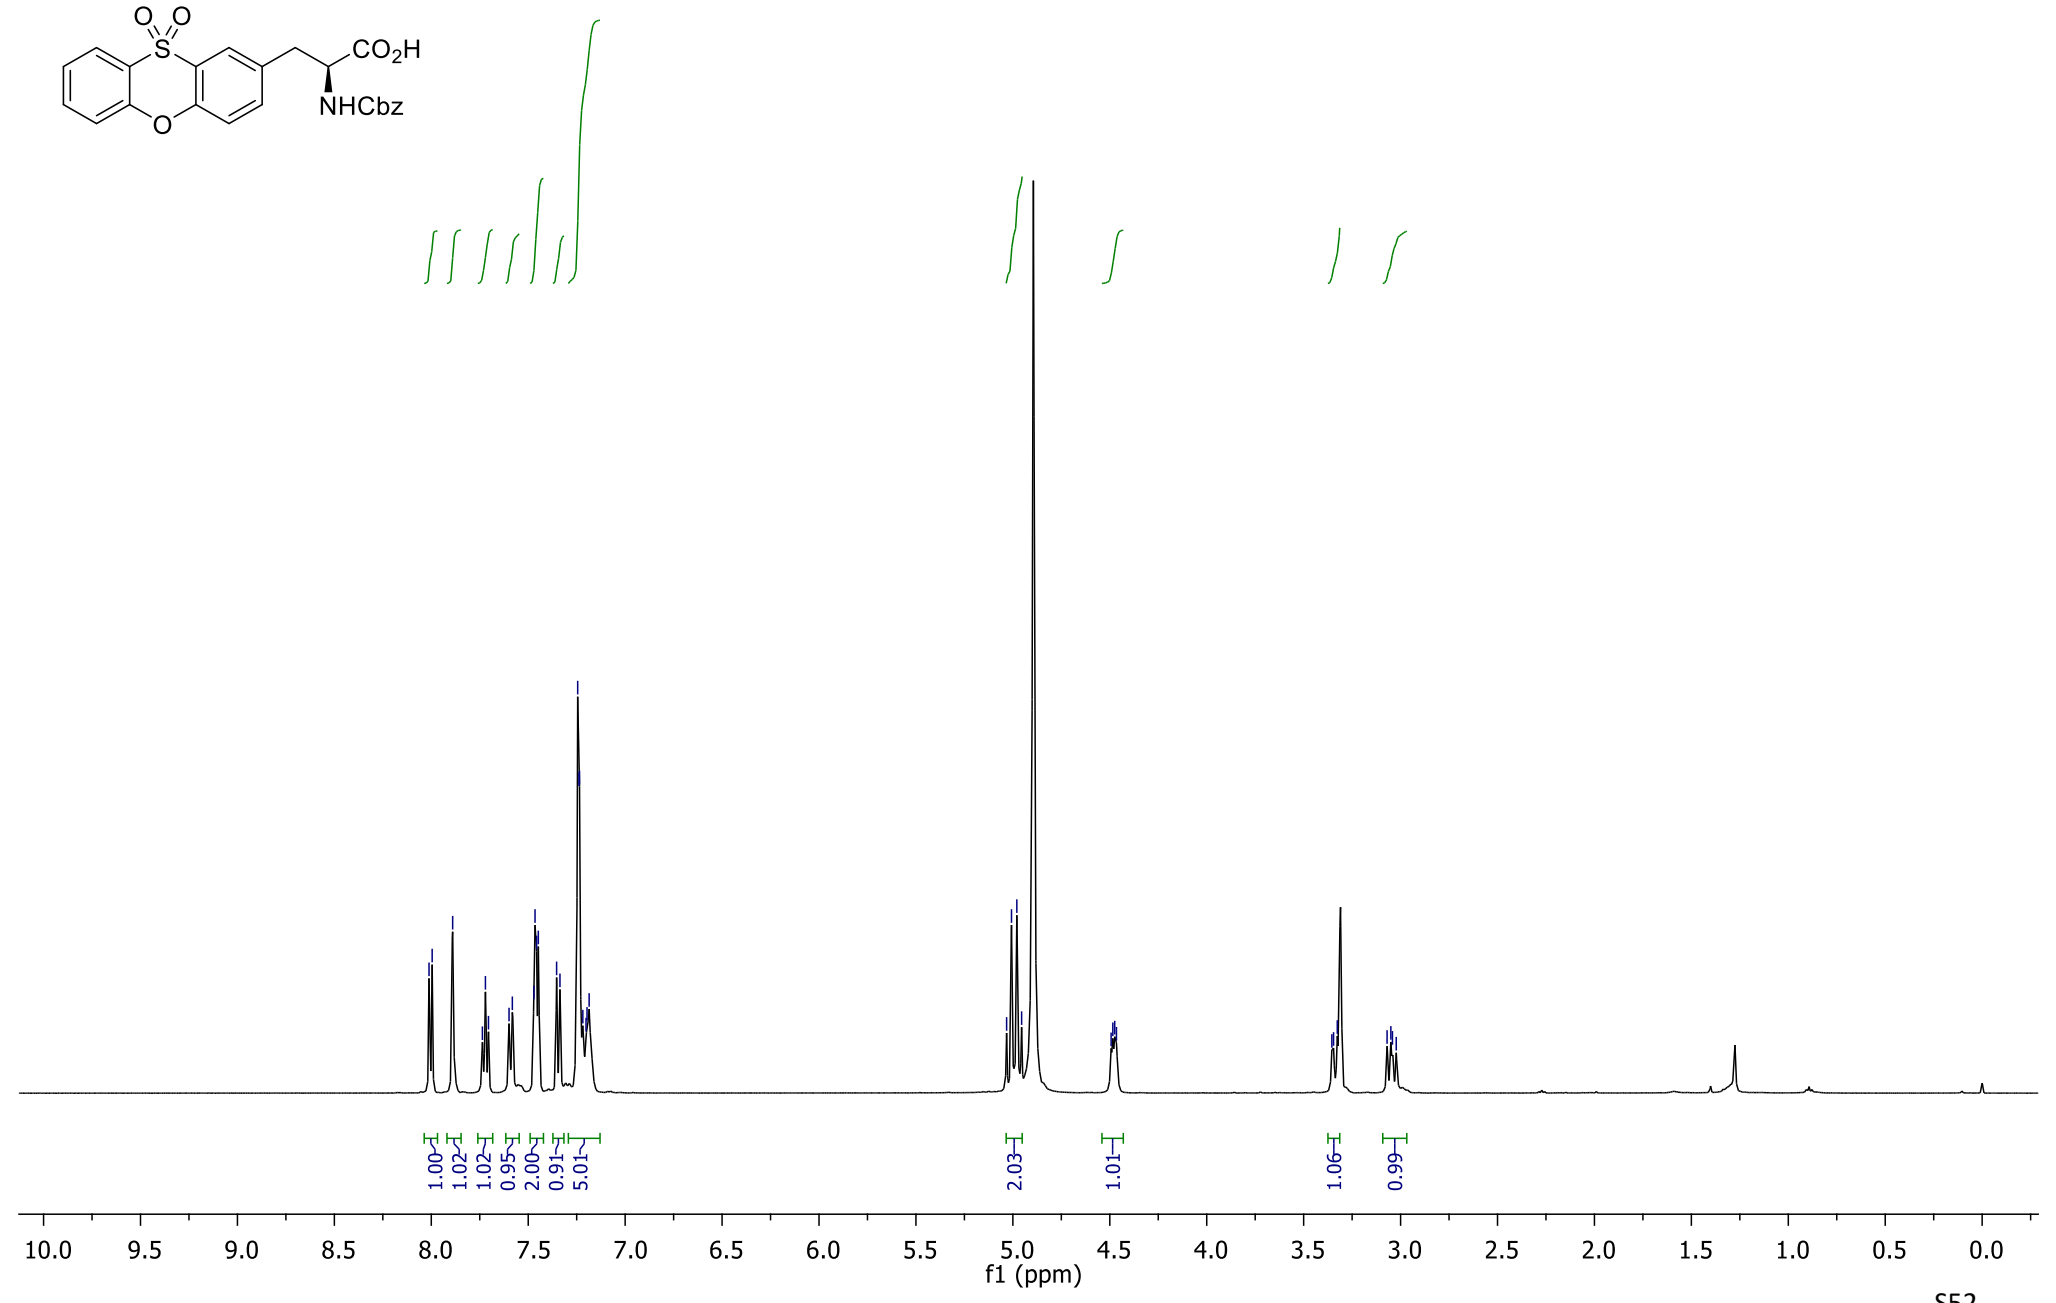

$^{13}\text{C}$  NMR (126 MHz,  $\text{CD}_3\text{OD}$ )

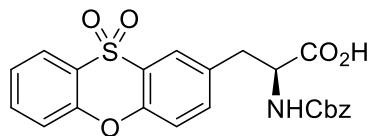

174.59

158.36

152.98

151.77

138.08

136.73

136.50

135.72

129.36

128.84

128.69

126.28

126.22

125.90

124.44

124.09

120.11

120.10

67.60

56.52

37.82

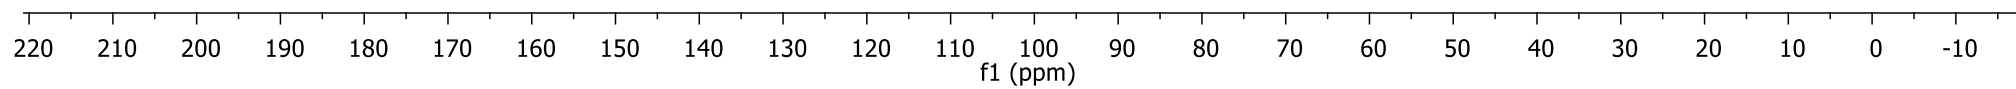

<sup>1</sup>H NMR (500 MHz, CD<sub>3</sub>OD)

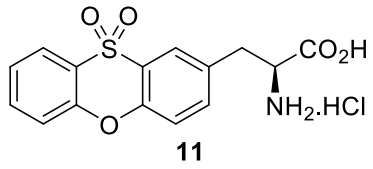

8.04  
8.03  
7.99  
7.99  
7.80  
7.78  
7.77  
7.73  
7.73  
7.72  
7.71  
7.54  
7.53  
7.53  
7.52  
7.51  
7.49

4.38  
4.37  
4.35

3.47  
3.45  
3.44  
3.43  
3.35  
3.33

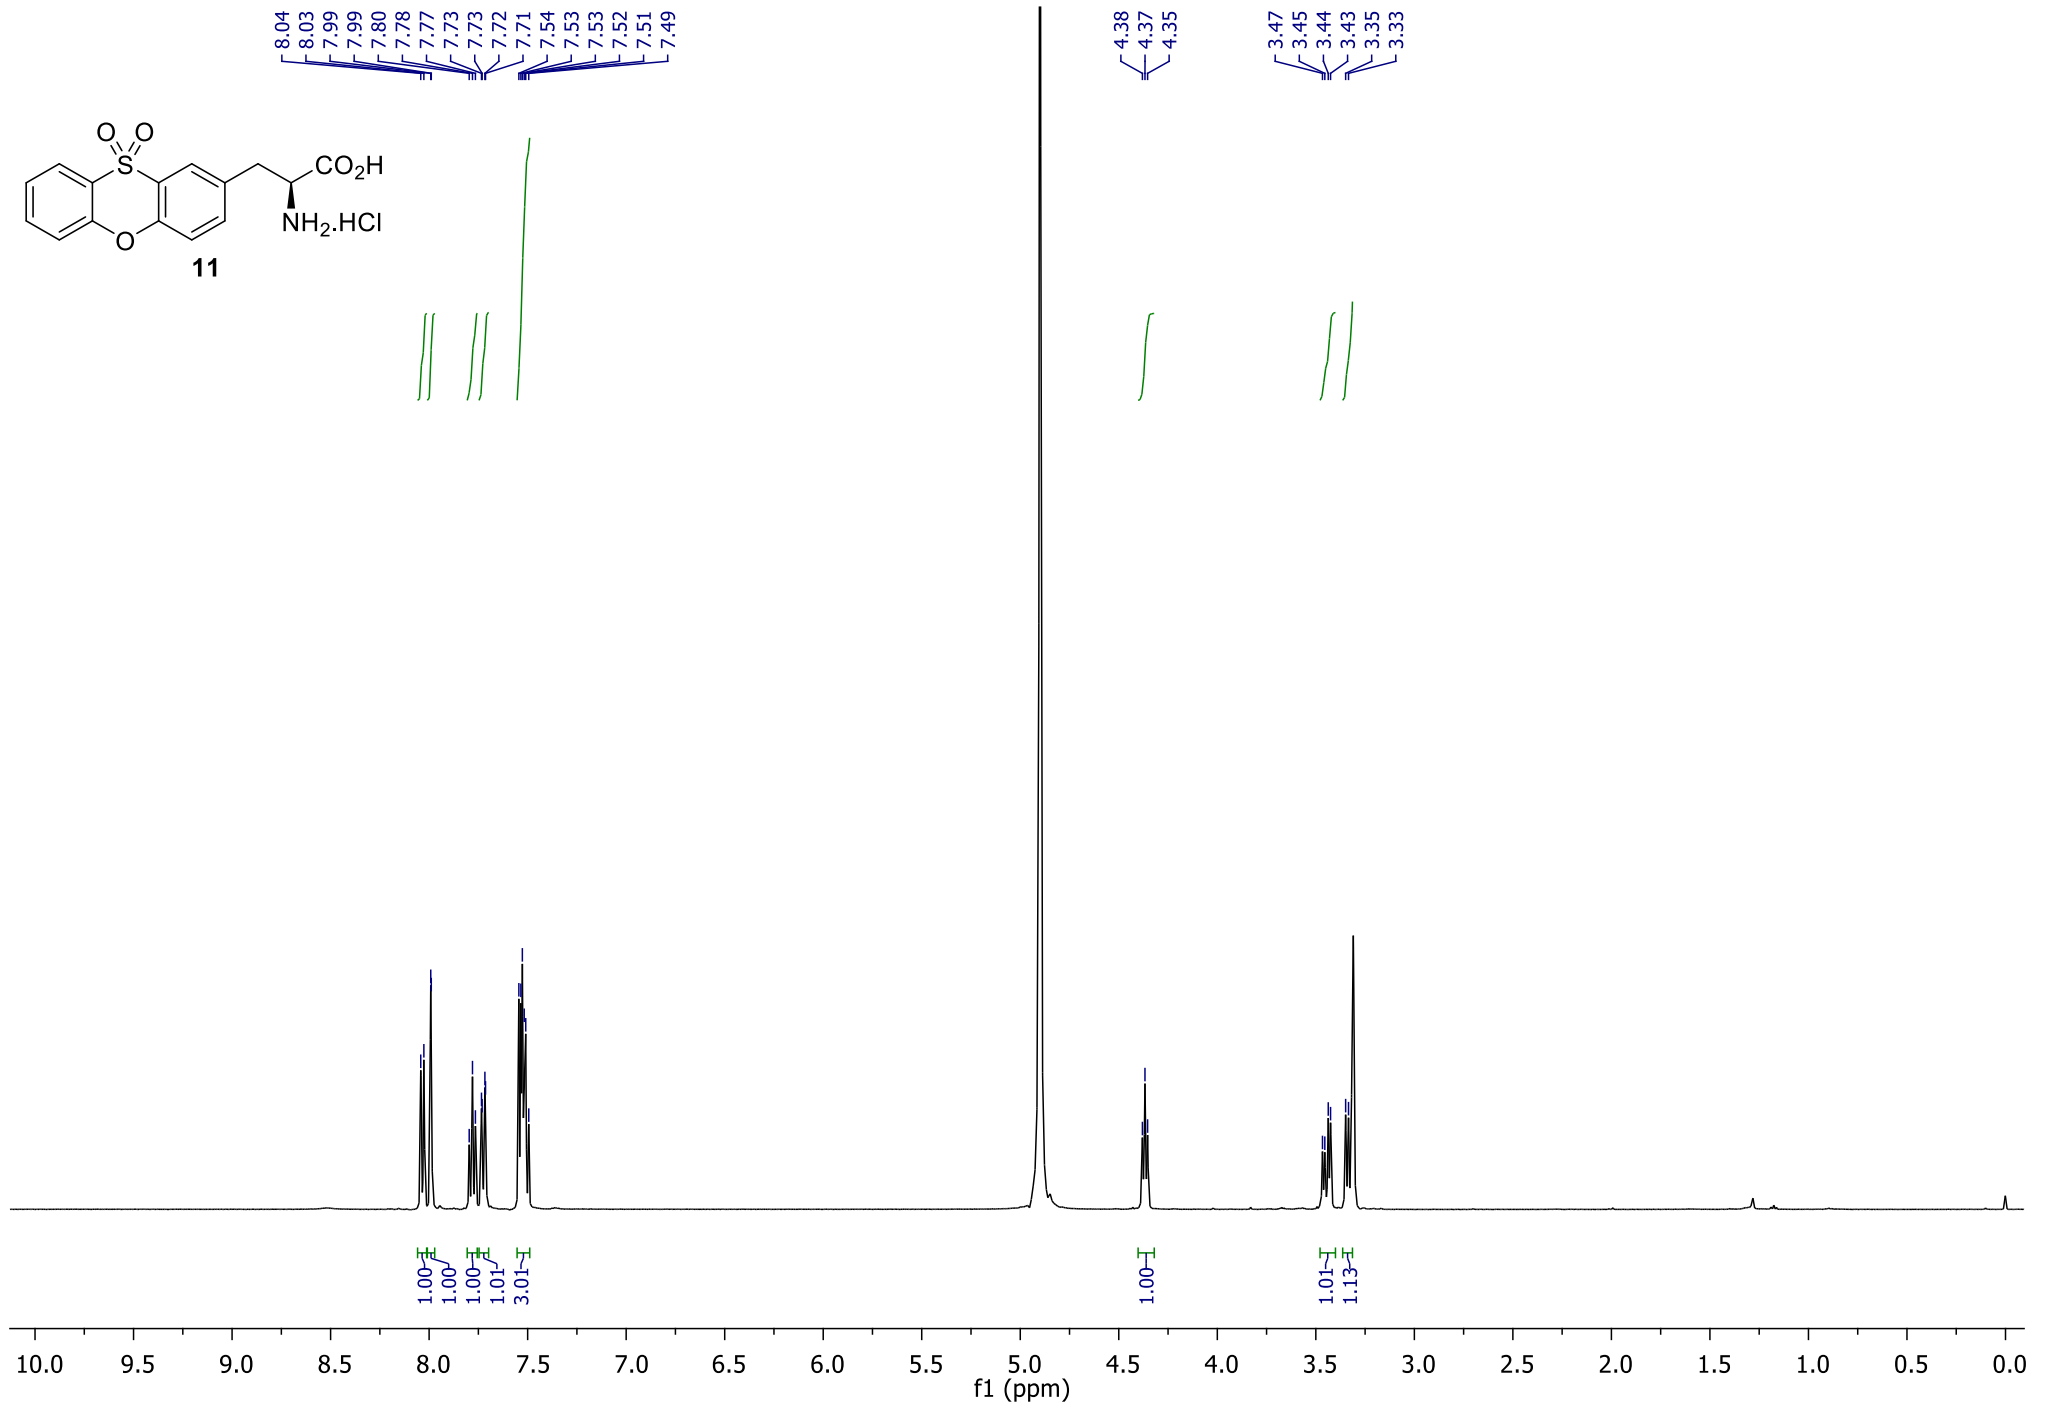

$^{13}\text{C}$  NMR (126 MHz,  $\text{CD}_3\text{OD}$ )

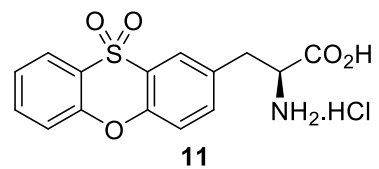

— 170.85

— 152.94  
— 152.56

— 136.93  
— 135.93

— 133.39

— 126.48

— 126.25

— 124.95

— 124.12

— 120.94

— 120.17

— 54.74

— 36.36

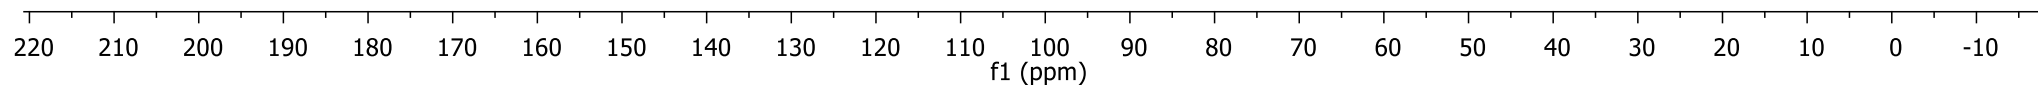

<sup>1</sup>H NMR (400 MHz, CDCl<sub>3</sub>)

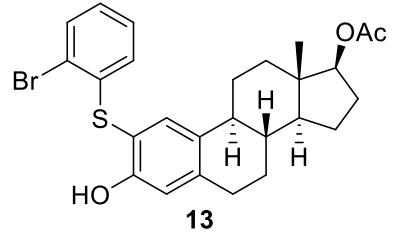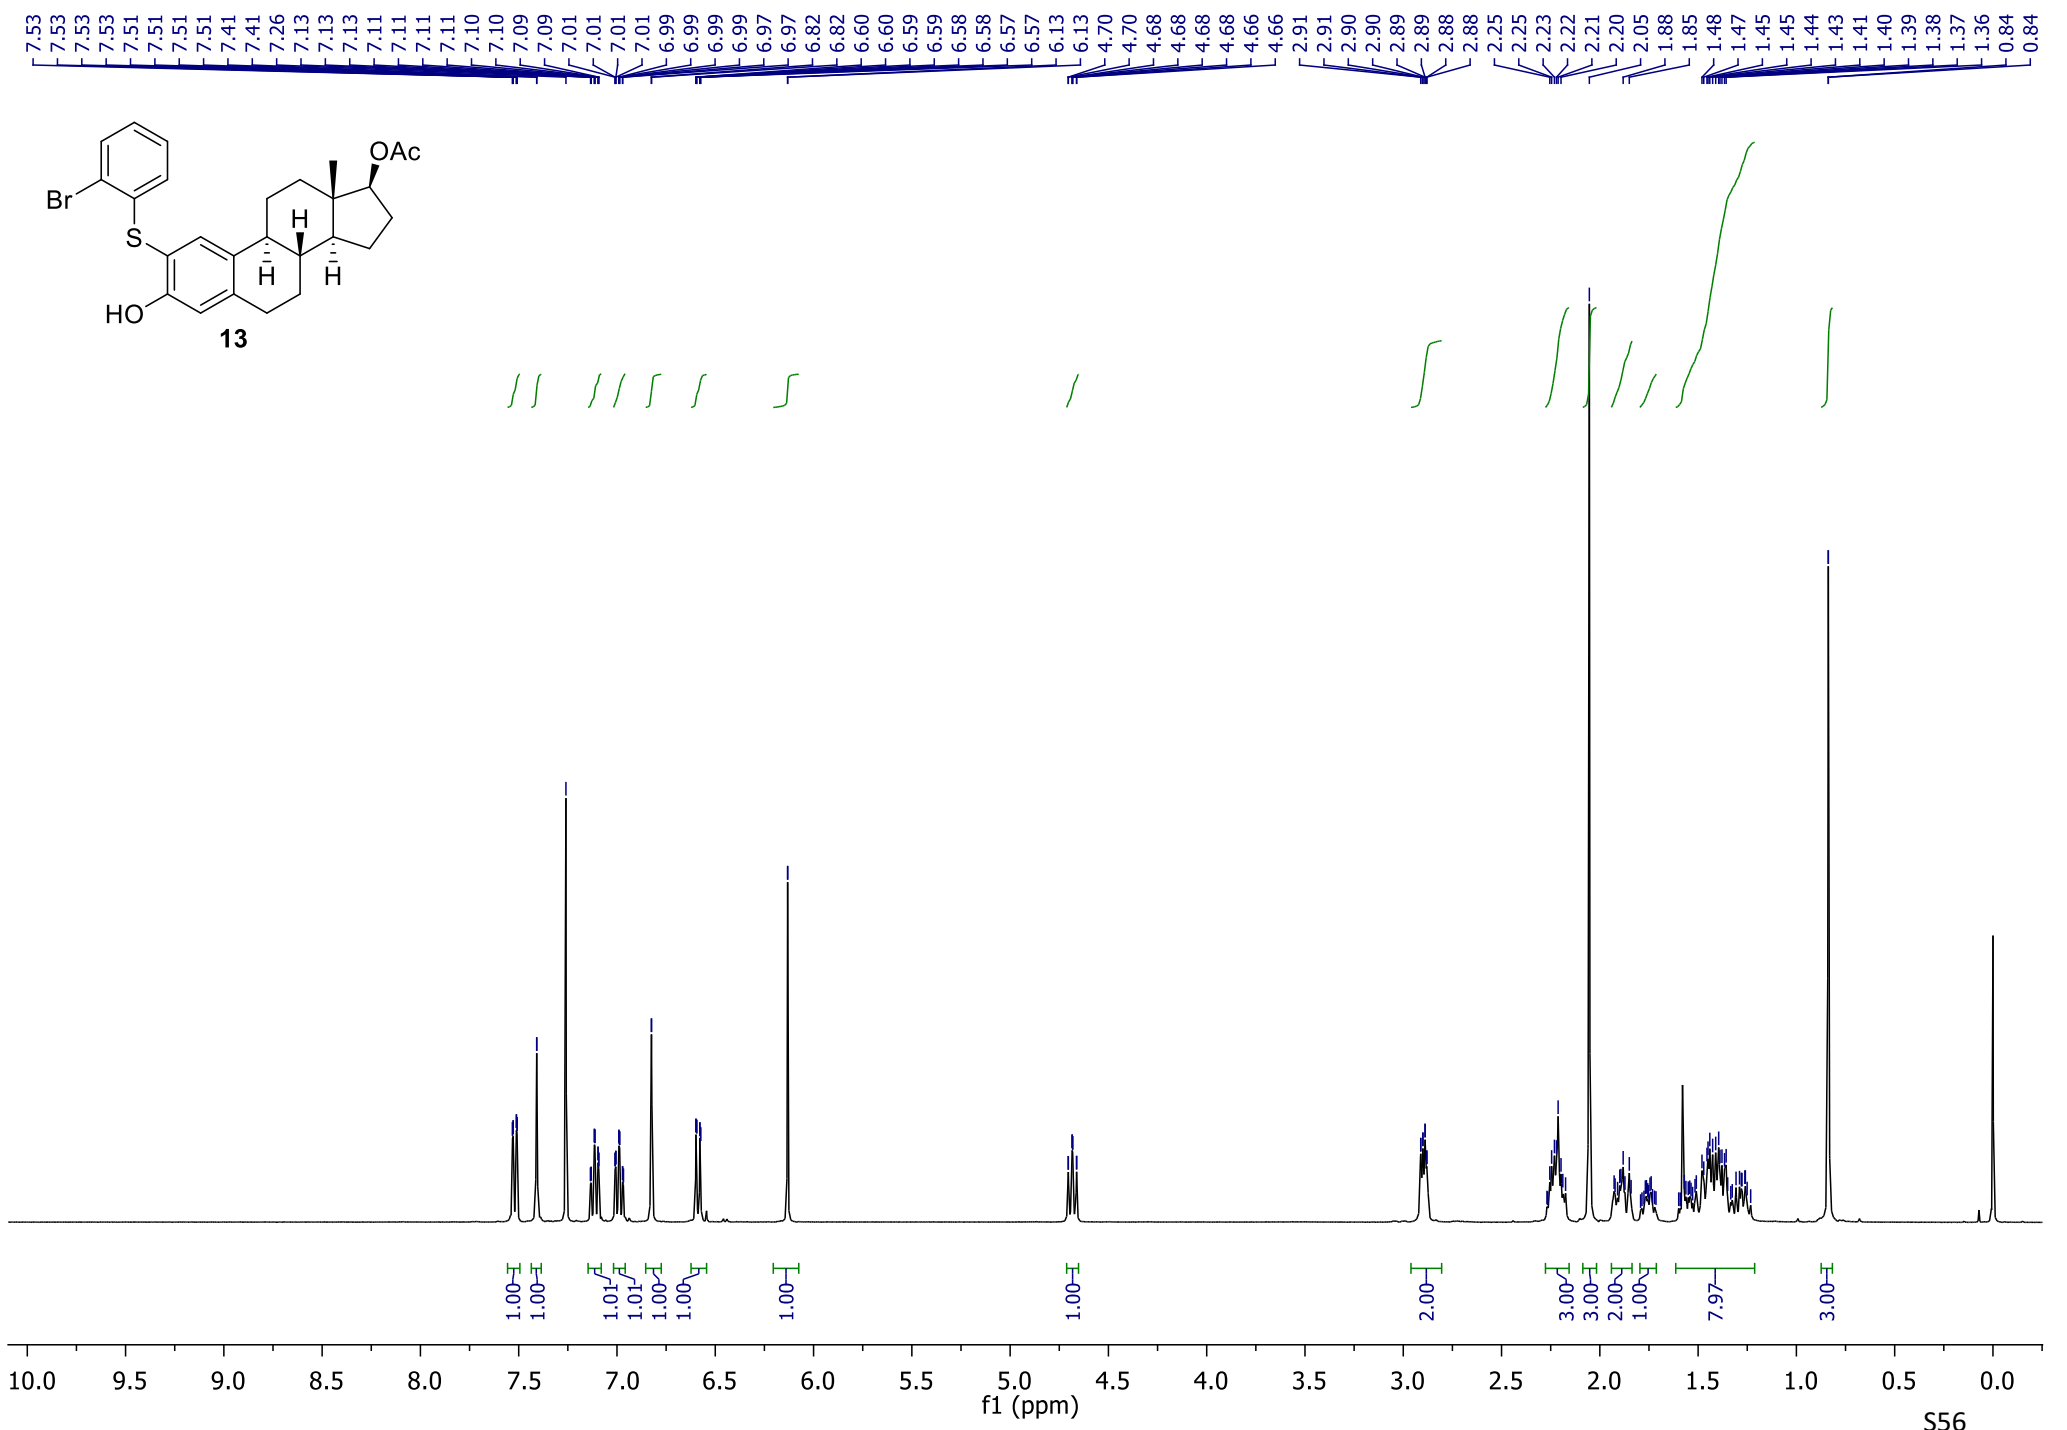



<sup>13</sup>C NMR (101 MHz, CDCl<sub>3</sub>)

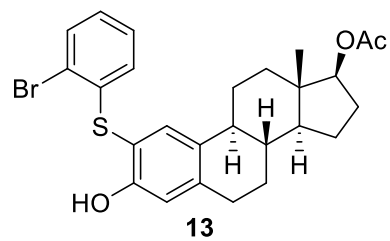

— 171.36

— 155.29

— 142.62

— 137.95

— 134.26

— 134.19

— 133.02

— 128.12

— 126.83

— 126.60

— 120.82

— 115.66

— 111.98

— 82.75

— 49.92

— 43.78

— 43.00

— 38.42

— 36.88

— 29.80

— 27.69

— 27.13

— 26.32

— 23.39

— 21.32

— 12.22

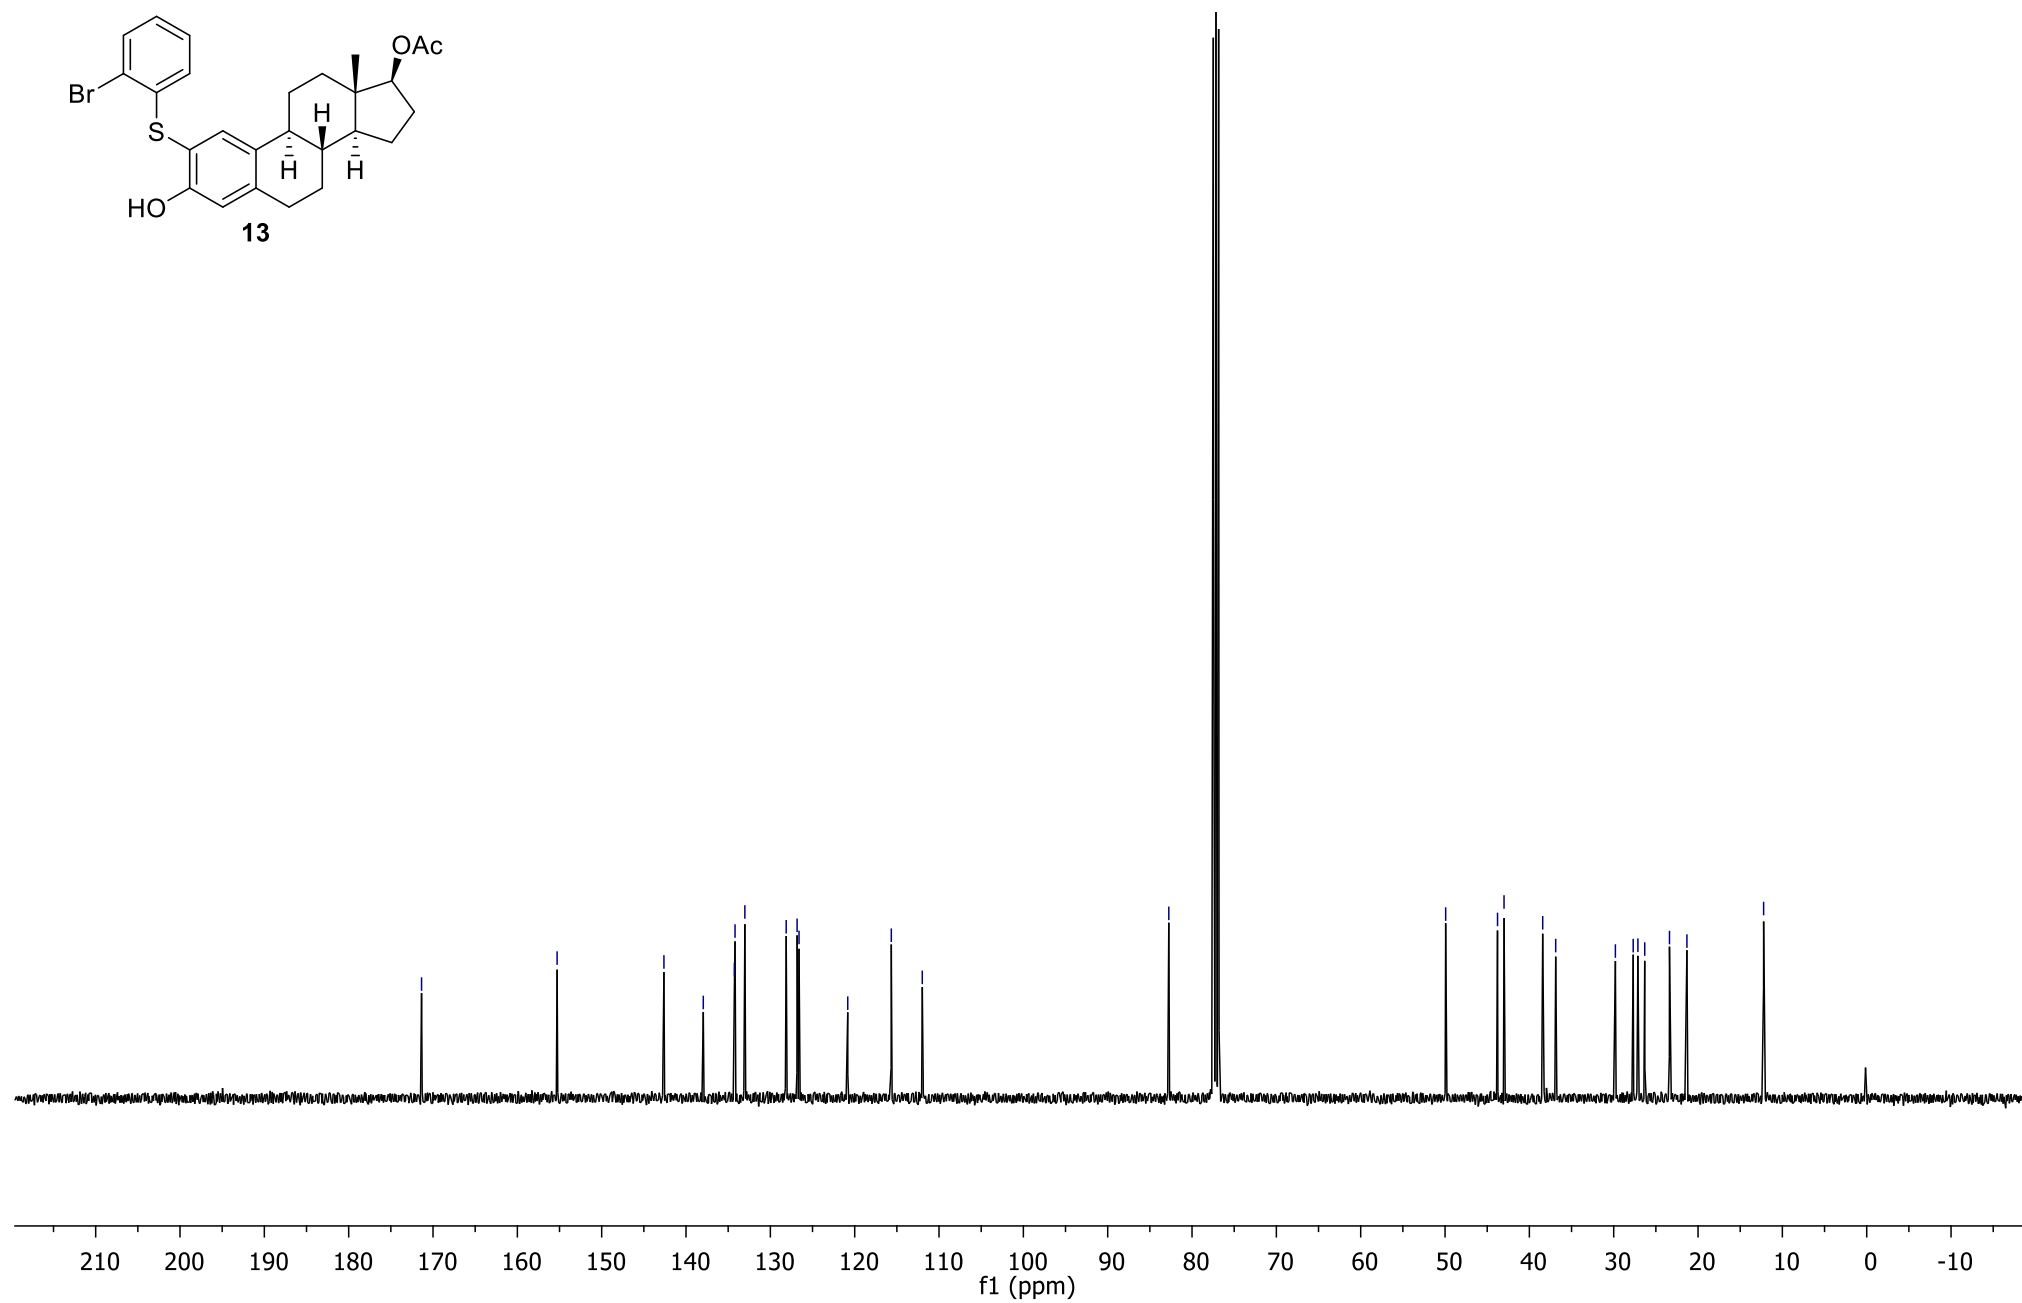

<sup>1</sup>H NMR (400 MHz, CDCl<sub>3</sub>)

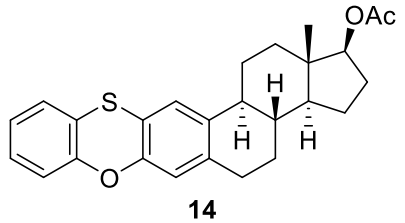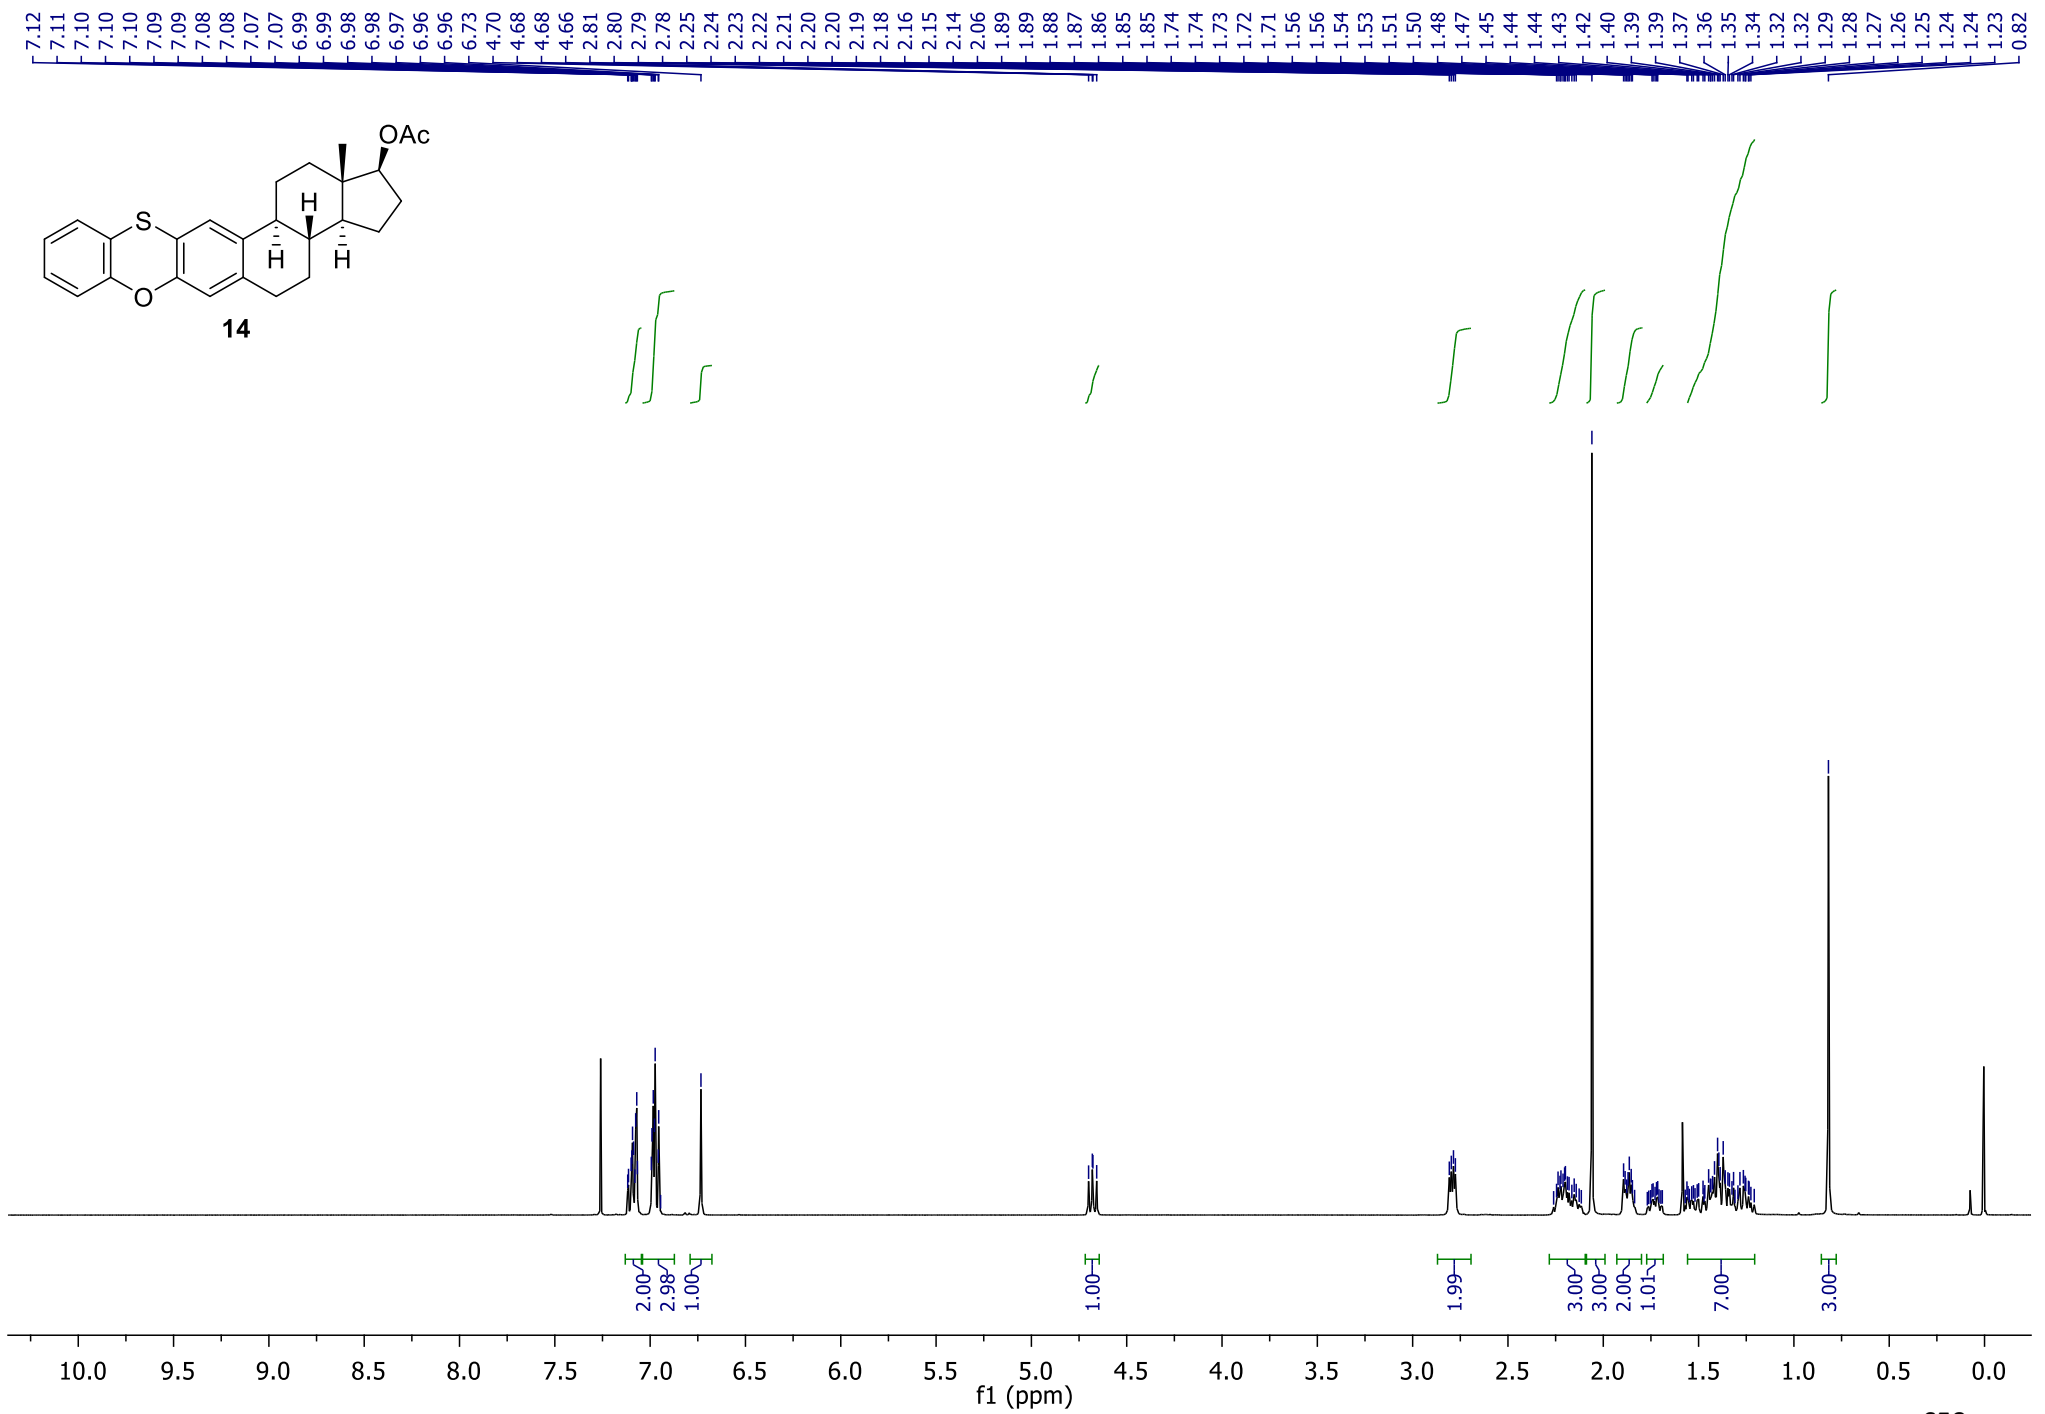

<sup>13</sup>C NMR (101 MHz, CDCl<sub>3</sub>)

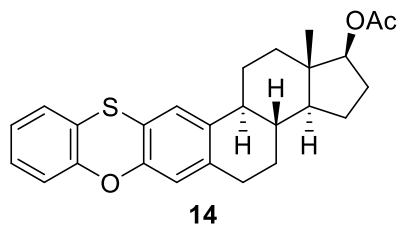

— 171.34

— 152.42  
— 149.96

— 136.92  
— 136.75  
— 127.60  
— 126.91  
— 124.35  
— 123.66  
— 120.58  
— 117.82  
— 117.77  
— 116.58

— 82.75

— 49.88  
— 43.85  
— 42.96  
— 38.37  
— 36.90  
— 29.25  
— 27.68  
— 27.14  
— 26.26  
— 23.37  
— 21.33

— 12.16

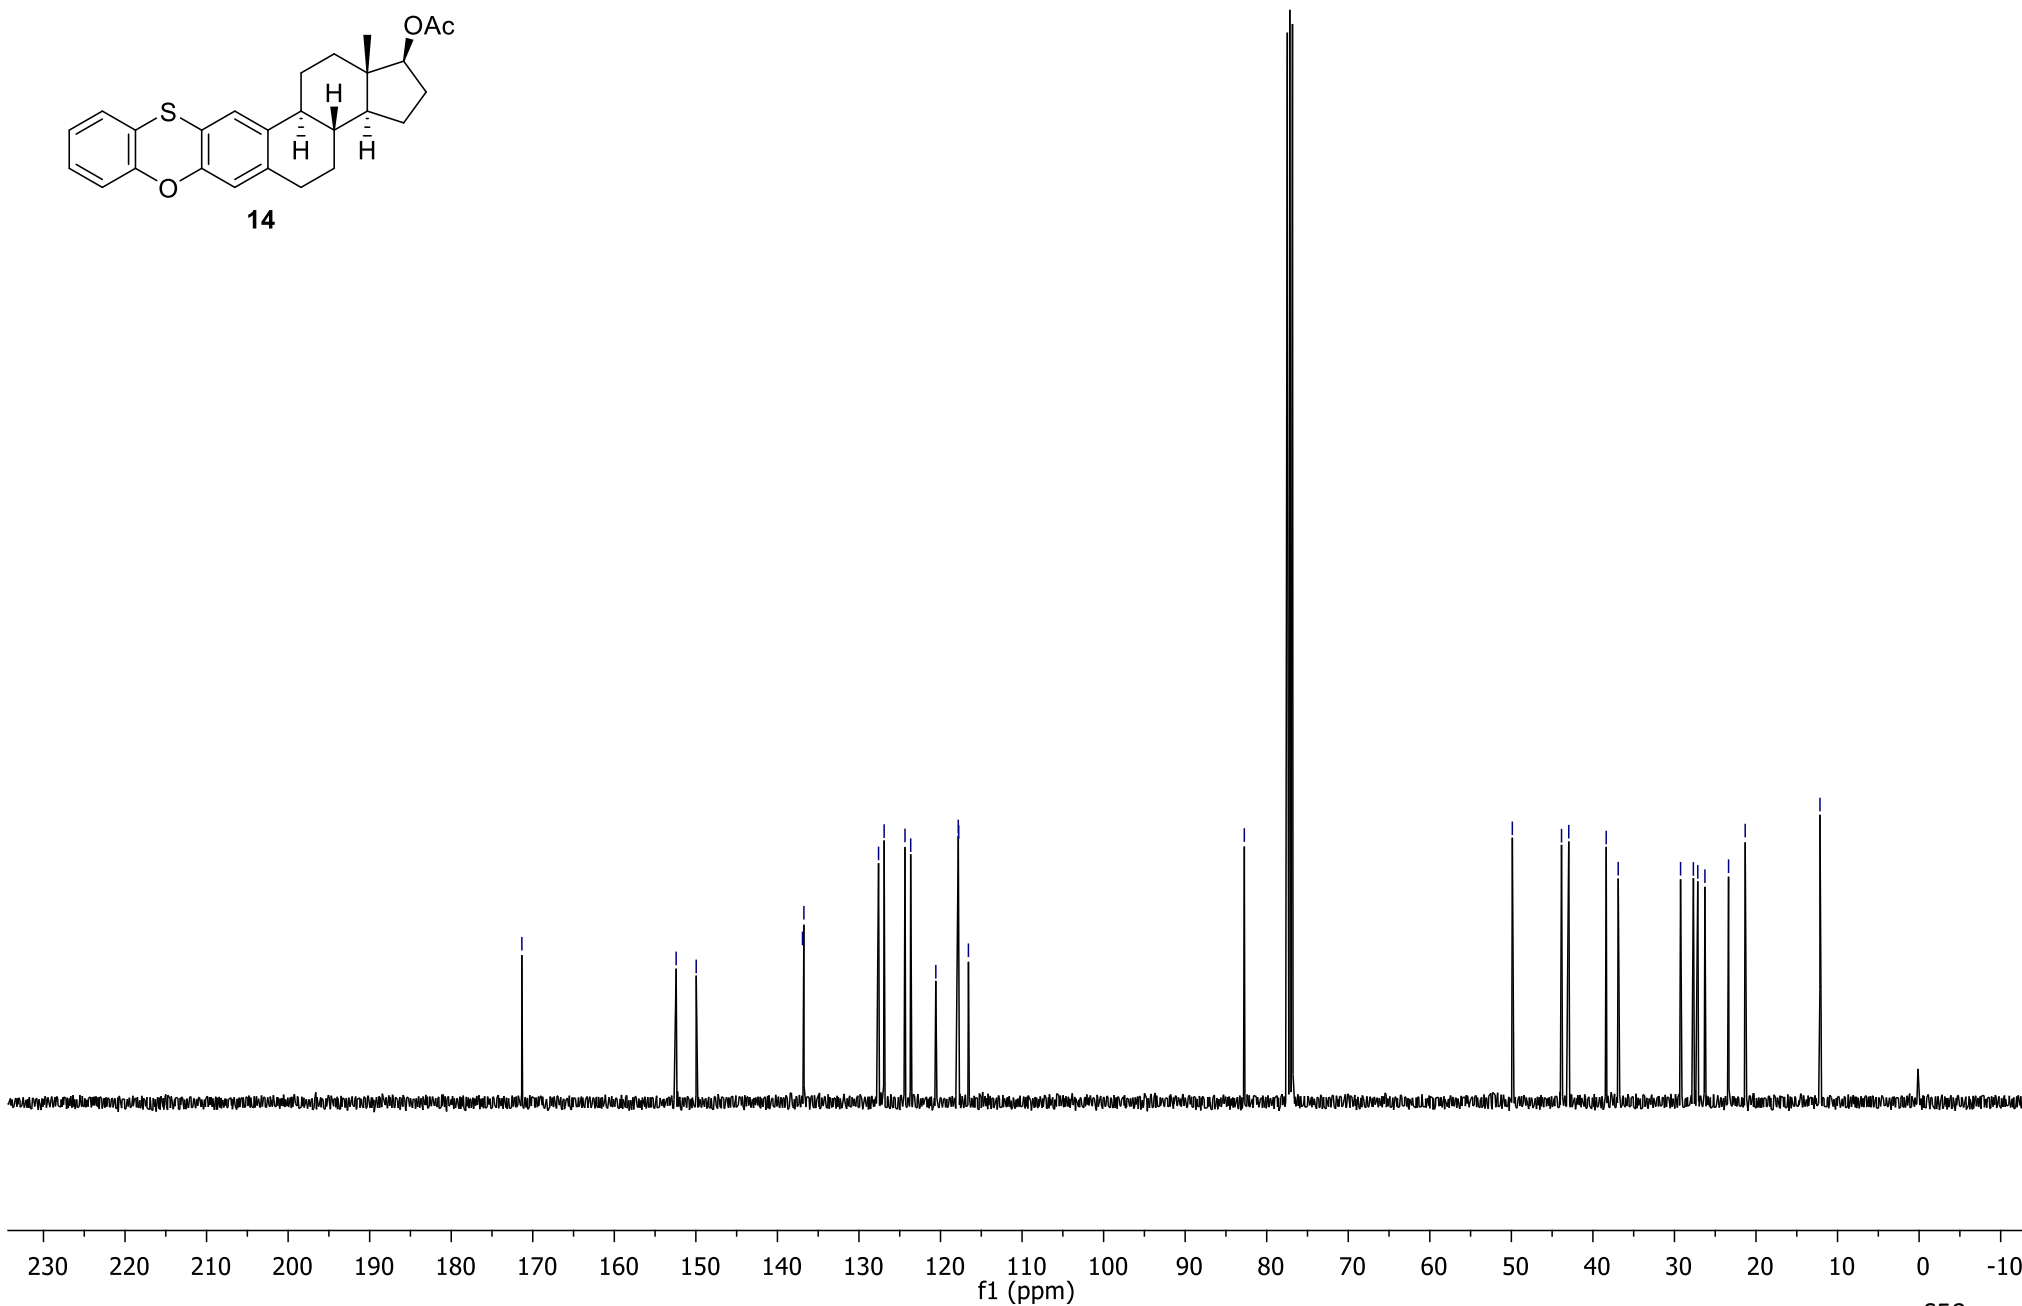

<sup>1</sup>H NMR (400 MHz, CDCl<sub>3</sub>)

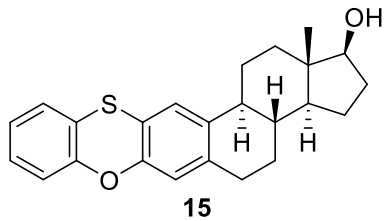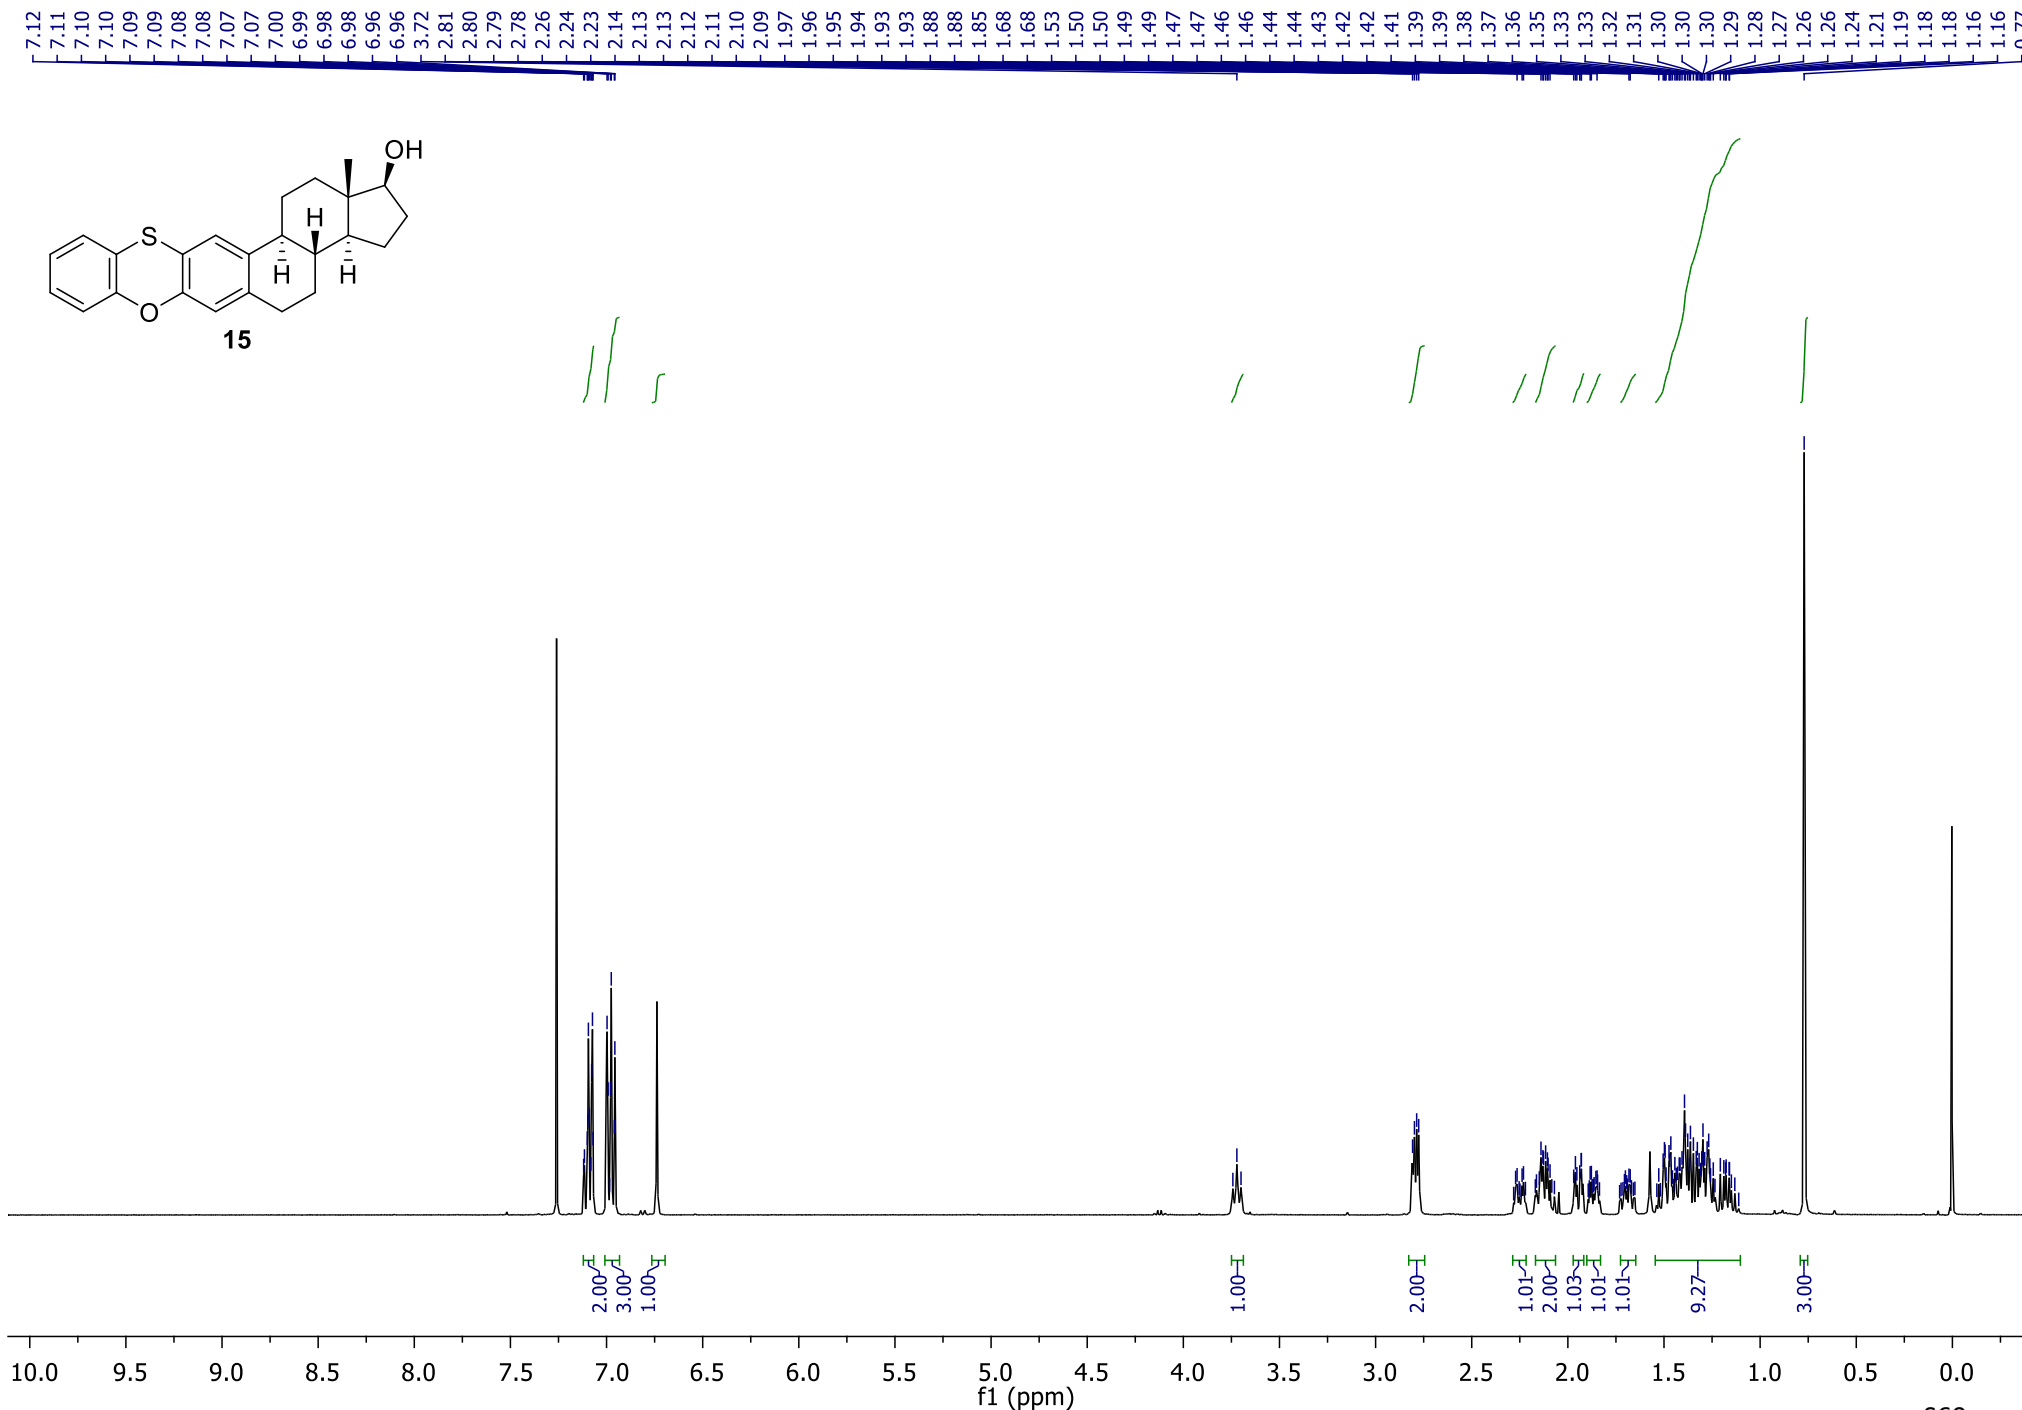

10.0

9.5

9.0

8.5

8.0

7.5

7.0

6.5

6.0

5.5

5.0

4.5

4.0

3.5

3.0

2.5

2.0

1.5

1.0

0.5

0.0

f1 (ppm)

S60

7.12  
7.11  
7.10  
7.09  
7.09  
7.08  
7.07  
7.07  
7.00  
6.99  
6.98  
6.98  
6.96  
6.96  
3.72  
2.81  
2.80  
2.79  
2.78  
2.26  
2.24  
2.23  
2.14  
2.13  
2.13  
2.12  
2.11  
2.10  
2.09  
1.97  
1.96  
1.95  
1.94  
1.93  
1.93  
1.88  
1.88  
1.85  
1.68  
1.68  
1.53  
1.50  
1.50  
1.49  
1.49  
1.47  
1.47  
1.46  
1.46  
1.44  
1.44  
1.43  
1.42  
1.42  
1.41  
1.39  
1.39  
1.38  
1.37  
1.36  
1.35  
1.33  
1.33  
1.32  
1.31  
1.30  
1.30  
1.29  
1.28  
1.27  
1.26  
1.26  
1.24  
1.24  
1.19  
1.18  
1.18  
1.16  
1.16  
0.77

$^{13}\text{C}$  NMR (101 MHz,  $\text{CDCl}_3$ )

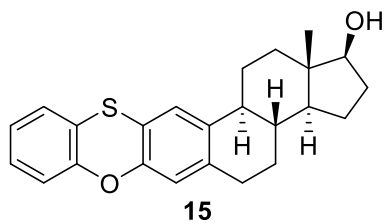

152.44  
149.95  
137.07  
136.85  
127.60  
126.92  
124.35  
123.67  
120.61  
117.83  
117.79  
116.56  
81.97  
50.14  
44.02  
43.32  
38.65  
36.72  
30.72  
29.29  
27.17  
26.39  
23.25  
11.16

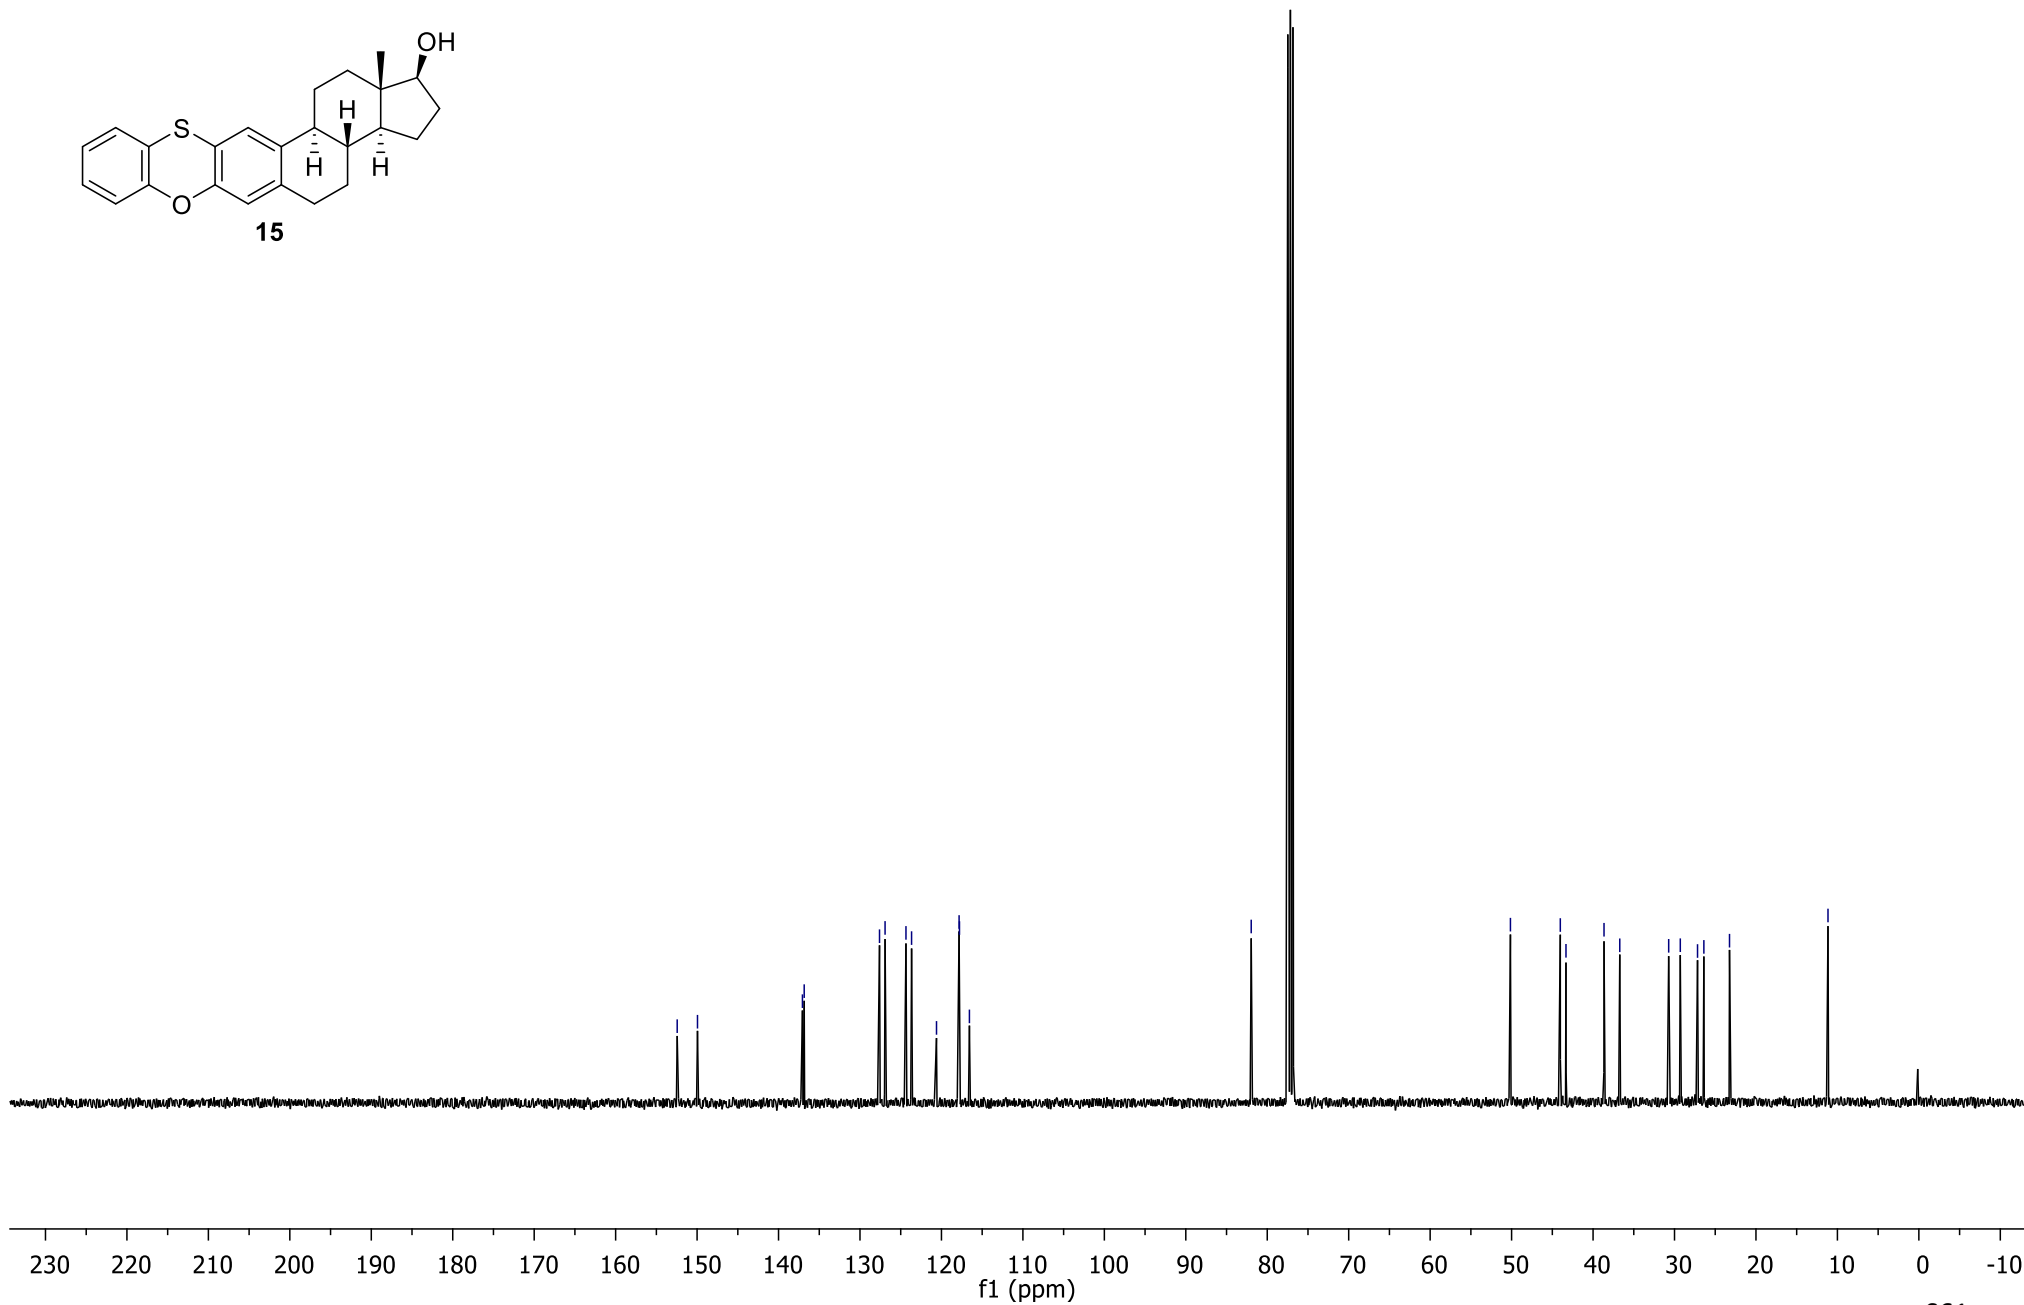

Supplement: d2ob00022a1.pdf [file d2ob00022a1.pdf]
